# Supplementary material for: Assembly of four modules onto a tetraazide platform by consecutive 1,2,3-triazole formations
Source: Royal Society of Chemistry journal article supplement (doi:10.1039/d0cc07789e), 2020-12-14

## Electronic Supplementary Information

### Assembly of four modules onto a tetraazide platform by consecutive 1,2,3-triazole formations

Suguru Yoshida,<sup>\*a</sup> Yuki Sakata,<sup>a</sup> Yoshihiro Misawa,<sup>a</sup> Takamoto Morita,<sup>a</sup>  
Tomoko Kuribara,<sup>a</sup> Harumi Ito,<sup>ab</sup> Yuka Koike,<sup>c</sup> Isao Kii,<sup>bc</sup> and Takamitsu Hosoya<sup>\*a</sup>

<sup>a</sup>Laboratory of Chemical Bioscience, Institute of Biomaterials and Bioengineering, Tokyo Medical and Dental University (TMDU), 2-3-10 Kanda-Surugadai, Chiyoda-ku, Tokyo 101-0062, Japan.

<sup>b</sup>Pathophysiological and Health Science Team, Division of Bio-Function Dynamics Imaging, Imaging Platform and Innovation Group, RIKEN Center for Life Science Technologies (CLST), 6-7-3 Minatojima-minamimachi, Chuo-ku, Kobe 650-0047, Japan.

<sup>c</sup>Common Facilities Unit, Compass to Healthy Life Research Complex Program, RIKEN Cluster for Science and Technology Hub, 6-7-3 Minatojima-minamimachi, Chuo-ku, Kobe 650-0047, Japan.

#### Contents

|                                                                   |            |
|-------------------------------------------------------------------|------------|
| <b>General Remarks</b>                                            | <b>S1</b>  |
| <b>Chemical Experiments</b>                                       | <b>S2</b>  |
| <b>Biological Experiments</b>                                     | <b>S20</b> |
| <b>Chemical modification of the HaloTag protein by 27</b>         | <b>S21</b> |
| <b>Characterization Data of New Compounds</b>                     | <b>S22</b> |
| <b>Absorption and Fluorescent Properties and Spectra of 26–28</b> | <b>S39</b> |
| <b>References for Supporting Information</b>                      | <b>S43</b> |
| <b>NMR Spectra of Compounds</b>                                   | <b>S44</b> |

#### General Remarks

All reactions were performed in dry glassware under atmosphere of argon otherwise noted. Analytical thin-layer chromatography (TLC) was performed on precoated (0.25 mm) silica-gel plates (Merck Chemicals, Silica Gel 60 F<sub>254</sub>, Cat. No. 1.05715). Column chromatography was conducted using silica-gel (Kanto Chemical Co., Inc., Silica Gel 60N, spherical neutral, particle size 40–50 μm, Cat. No. 37563-85 or particle size 63–210 μm, Cat. No. 37565-85). Preparative thin-layer chromatography (PTLC) was performed on silica-gel (Wako Pure Chemical Industries Ltd., Wakogel B5-F, Cat. No. 230-00043). Melting points (Mp) were measured on a YANACO MP-J3 instrument or an OptiMelt MPA100 (Stanford Research Systems), and are uncorrected. <sup>1</sup>H and <sup>13</sup>C NMR spectra were obtained with a Bruker AVANCE 500 spectrometer at 500 or 126 MHz, respectively. <sup>19</sup>F NMR spectra were obtained with a Bruker AVANCE 400 spectrometer at 376 MHz. Chemical shifts (δ) are given in parts per million (ppm) downfield from (CH<sub>3</sub>)<sub>4</sub>Si (δ 0.00 for <sup>1</sup>H NMR in CDCl<sub>3</sub>) or the solvent peak (δ 77.0 for <sup>13</sup>C NMR in CDCl<sub>3</sub>) as an internal reference or α,α,α-trifluorotoluene (δ –63.0 ppm for <sup>19</sup>F NMR in CDCl<sub>3</sub>) as an external standard with coupling constants (*J*) in hertz (Hz). The abbreviations s, d, t, q, sept, m, and br signify singlet, doublet, triplet, quartet, septet, multiplet, and broad, respectively. IR spectra were measured by diffuse reflectance method on a Shimadzu IRPrestige-21 spectrometer attached with DRS-8000A with the absorption band given in cm<sup>-1</sup>. High-resolution mass spectra (HRMS) were measured on a Bruker micrOTOF mass spectrometer under positive electrospray ionization (ESI<sup>+</sup>) conditions. High-performance liquid chromatography (HPLC) was performed on a Shimadzu Prominence HPLC system (CBM-20A lite, LC-20AD × 2, DGU-20A3R, SUS316L, and CTO-20A) equipped with a Shimadzu SPD-20A UV/Vis detector. The absorbance spectra (UV/Vis) and fluorescence spectra (FL) were measured with a JASCO UV-650 spectrophotometer and a JASCO FP-8500 spectrofluorophotometer, respectively, at 25 °C using a quartz cuvette (10 mm light path).

Unless otherwise noted, materials obtained from commercial suppliers were used without further purification. 5,6-Didehydro-11,12-dihydrodibenzo[*a,e*]cyclooctene (**7**),<sup>S1</sup> (1 $\alpha$ ,8 $\alpha$ ,9 $\alpha$ )-bicyclo[6.1.0]non-4-yn-9-ylmethyl *N*-(2-(2-(2-propyn-1-yloxy)ethoxy)ethyl)carbamate (**17**),<sup>S2</sup>  $\beta$ -ketoamide **22**,<sup>S3</sup> alkyne **23**,<sup>S3</sup> cycloalkyne **24**,<sup>S3</sup> 3-azidoadamantane-1-carboxylic acid (**S2**),<sup>S4</sup> 4-(azidomethyl)phenylboronic acid (**S5**),<sup>S5</sup> 1-azido-2,6-diisopropyl-4-(4,4,5,5-tetramethyl-1,3,2-dioxaborolan-2-yl)benzene (**S8**),<sup>S3</sup> 3-azido-5-(azidomethyl)phenylboronic acid (**S14**),<sup>S6</sup> and tris[(1-benzyl-1*H*-1,2,3-triazol-4-yl)methyl]amine (TBTA)<sup>S7</sup> were prepared according to the reported methods.

## Chemical Experiments

### *A typical procedure for the CuAAC reaction*

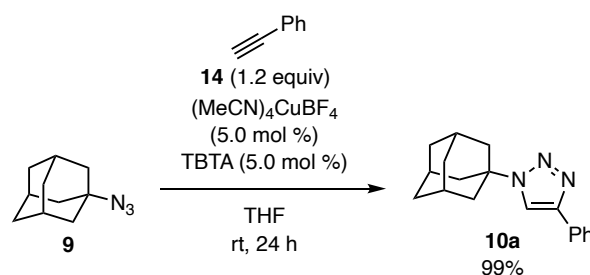

To a mixture of 1-azidoadamantane (**9**) (88.7 mg, 0.500 mmol), (MeCN)<sub>4</sub>CuBF<sub>4</sub> (7.87 mg, 25.0  $\mu$ mol), and TBTA (13.3 mg, 25.1  $\mu$ mol) dissolved in THF (3.0 mL) was added phenylacetylene (**14**) (61.4 mg, 0.601 mmol) at room temperature. After stirring for 24 h at the same temperature, the mixture was concentrated under reduced pressure. The residue was purified by column chromatography (Biotage<sup>®</sup> ZIP sphere cartridge 10 g, *n*-hexane/EtOAc = 89/11 to 68/32) to give 1-(adamantan-1-yl)-4-phenyl-1*H*-1,2,3-triazole (**10a**) (139 mg, 0.498 mmol, 99%) as a colorless solid.

### *Synthesis of 3-azido-*N*-(4-azidobenzyl)-1-adamantanamide (13)*

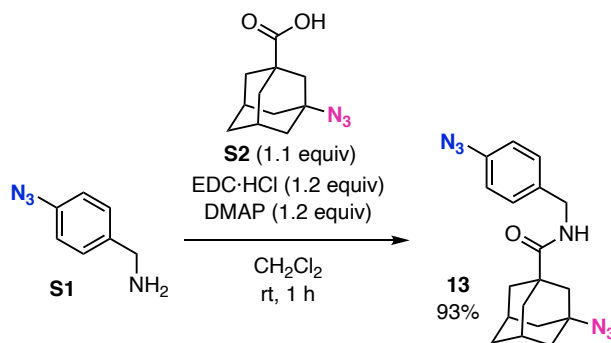

To a mixture of 4-azidobenzylamine (**S1**) (415 mg, 2.80 mmol) and 3-azido-1-adamantanecarboxylic acid (**S2**) (682 mg, 3.08 mmol) dissolved in CH<sub>2</sub>Cl<sub>2</sub> (30 mL) was added 1-ethyl-3-(3-dimethylaminopropyl)carbodiimide hydrochloride (644 mg, 3.36 mmol) and 4-(dimethylamino)pyridine (410 mg, 3.36 mmol) at room temperature. After stirring for 1 h at the same temperature, the mixture was concentrated under reduced pressure. The residue was purified by flash column chromatography (Biotage<sup>®</sup> ZIP-sphere cartridge 45 g, *n*-hexane/EtOAc = 1/1) to give 3-azido-*N*-(4-azidobenzyl)-1-adamantanamide (**13**) (910 mg, 2.59 mmol, 93%) as a colorless solid.

*A procedure for the triazole formation using 1,3-dicarbonyl compounds*

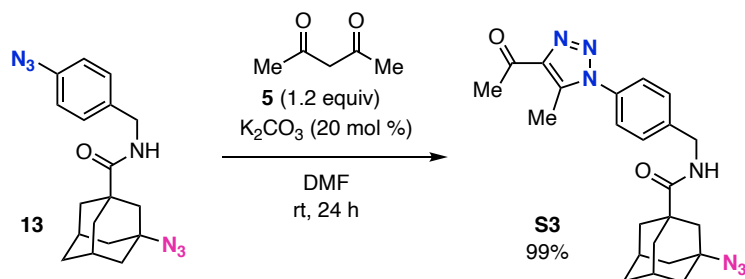

To a mixture of 3-azido-*N*-(4-azidobenzyl)-1-adamantanamide (**13**) (35.2 mg, 0.100 mmol), acetylacetone (**5**) (12.1 mg, 0.121 mmol) dissolved in DMF (2.0 mL) was added  $K_2CO_3$  (2.8 mg, 20  $\mu$ mol) at room temperature. After stirring for 24 h at the same temperature, to the mixture was added water. The mixture was extracted with  $Et_2O$ . The combined organic extract was washed with brine and dried with  $Na_2SO_4$ . After filtration, the filtrate was concentrated under reduced pressure. The residue was purified by preparative TLC (*n*-hexane/ $EtOAc$  = 1/1) to give *N*-(4-(4-acetyl-5-methyl-1,2,3-triazol-1-yl)benzyl)-3-azido-1-adamantanamide (**S3**) (43.0 mg, 99.2  $\mu$ mol, 99%) as a colorless oil.

*Synthesis of N-(4-(4-acetyl-5-methyl-1,2,3-triazol-1-yl)benzyl)-3-(4-phenyl-1,2,3-triazol-1-yl)-1-adamantanamide (15a)*

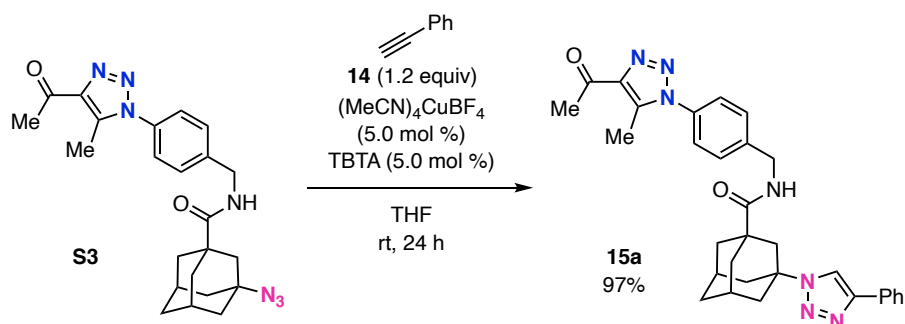

To a mixture of *N*-(4-(4-acetyl-5-methyl-1,2,3-triazol-1-yl)benzyl)-3-azido-1-adamantanamide (**S3**) (21.4 mg, 49.4  $\mu$ mol),  $(MeCN)_4CuBF_4$  (0.78 mg, 2.5  $\mu$ mol), and TBTA (1.30 mg, 2.45  $\mu$ mol) dissolved in THF (1.0 mL) was added phenylacetylene (**14**) (6.05 mg, 59.2  $\mu$ mol) at room temperature. After stirring for 24 h at the same temperature, the mixture was concentrated under reduced pressure. The residue was purified by preparative TLC ( $CH_2Cl_2/MeOH$  = 19/1) to give *N*-(4-(4-acetyl-5-methyl-1,2,3-triazol-1-yl)benzyl)-3-(4-phenyl-1,2,3-triazol-1-yl)-1-adamantanamide (**15a**) (25.7 mg, 48.0  $\mu$ mol, 97%) as a colorless solid.

*Synthesis of 3-azido-N-(4-(4-phenyl-1,2,3-triazol-1-yl)benzyl)-1-adamantanamide (S4)*

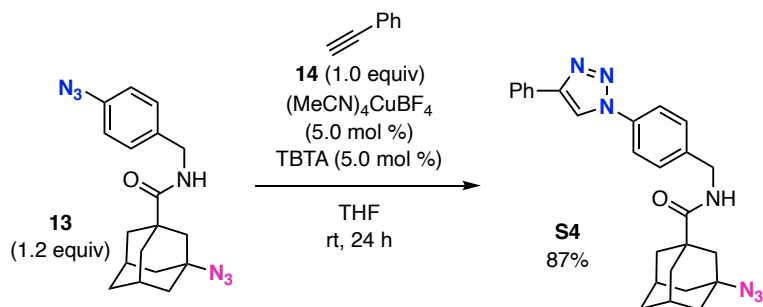

To a mixture of 3-azido-*N*-(4-azidobenzyl)-1-adamantanamide (**13**) (42.2 mg, 0.120 mmol),  $(MeCN)_4CuBF_4$  (1.57 mg, 4.99  $\mu$ mol), and TBTA (2.65 mg, 4.99  $\mu$ mol) dissolved in THF (2.0 mL) was added phenylacetylene (**14**) (10.2 mg, 99.9  $\mu$ mol) at room temperature. After stirring for 24 h at

the same temperature, the mixture was concentrated under reduced pressure. The residue was purified by preparative TLC (*n*-hexane/EtOAc = 1/2) to give 3-azido-*N*-(4-(4-phenyl-1,2,3-triazol-1-yl)benzyl)-1-adamantanamide (**S4**) (39.6 mg, 87.3  $\mu$ mol, 87%) as a colorless solid.

*Synthesis of 3-(4-(2-hydroxyprop-2-yl)-*N*-(4-(4-phenyl-1,2,3-triazol-1-yl)benzyl)-1,2,3-triazol-1-yl)-1-adamantanamide (**15b**)*

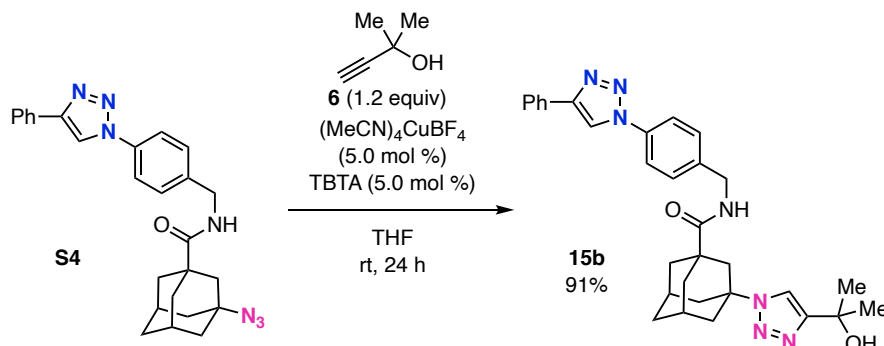

To a mixture of 3-azido-*N*-(4-(4-phenyl-1,2,3-triazol-1-yl)benzyl)-1-adamantanamide (**S4**) (25.9 mg, 57.1  $\mu$ mol),  $(\text{MeCN})_4\text{CuBF}_4$  (0.90 mg, 2.9  $\mu$ mol), and TBTA (1.51 mg, 2.85  $\mu$ mol) dissolved in THF (1.2 mL) was added 2-methyl-3-butyn-2-ol (**6**) (5.76 mg, 68.5  $\mu$ mol) at room temperature. After stirring for 24 h at the same temperature, the mixture was concentrated under reduced pressure. The residue was purified by preparative TLC ( $\text{CH}_2\text{Cl}_2/\text{MeOH} = 10/1$ ) to give *N*-(4-(4-phenyl-1,2,3-triazol-1-yl)benzyl)-3-(4-(2-hydroxyprop-2-yl)-1,2,3-triazol-1-yl)-1-adamantanamide (**15b**) (27.9 mg, 51.9  $\mu$ mol, 91%) as a pale yellow oil.

*One-pot synthesis of 3-(4-(2-hydroxyprop-2-yl)-*N*-(4-(4-phenyl-1,2,3-triazol-1-yl)benzyl)-1,2,3-triazol-1-yl)-1-adamantanamide (**15b**)*

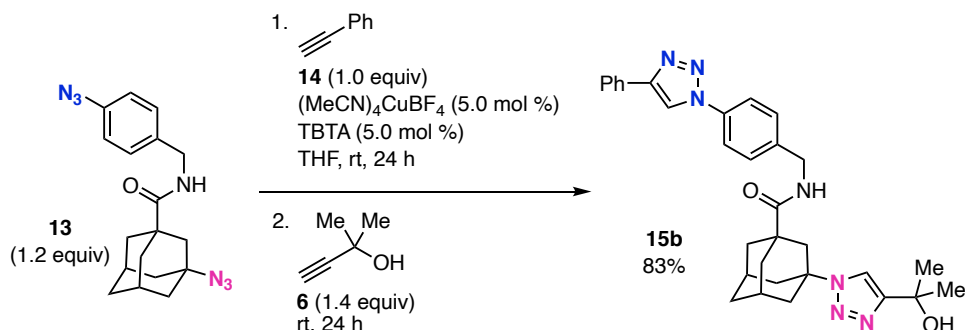

To a mixture of 3-azido-*N*-(4-azidobenzyl)-1-adamantanamide (**13**) (42.2 mg, 0.120 mmol),  $(\text{MeCN})_4\text{CuBF}_4$  (1.57 mg, 4.99  $\mu$ mol), and TBTA (2.65 mg, 4.99  $\mu$ mol) dissolved in THF (2.0 mL) was added phenylacetylene (**14**) (10.2 mg, 9.99  $\mu$ mol) at room temperature. After stirring for 24 h at the same temperature, to the mixture was added 2-methyl-3-butyn-2-ol (**6**) (12.0 mg, 0.143 mmol). After stirring for 24 h, the mixture was concentrated under reduced pressure. The residue was purified by preparative TLC ( $\text{CH}_2\text{Cl}_2/\text{MeOH} = 10/1$ ) to give 3-(4-(2-hydroxyprop-2-yl)-*N*-(4-(4-phenyl-1,2,3-triazol-1-yl)benzyl)-1,2,3-triazol-1-yl)-1-adamantanamide (**15b**) (44.8 mg, 83.3  $\mu$ mol, 83%) as a pale yellow oil.



### Synthesis of methyl 3-(4-(azidomethyl)phenyl)-5-bromobenzoate (**S7**)

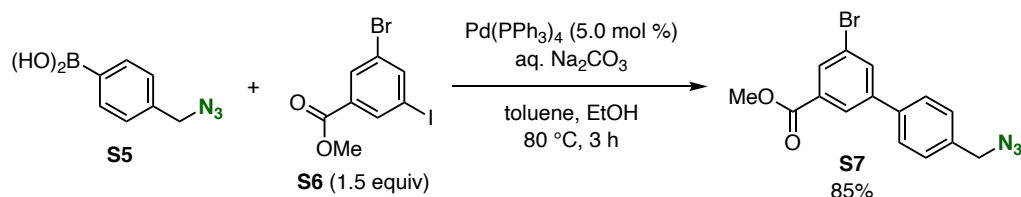

To a solution of 4-(azidomethyl)phenylboronic acid (**S5**) (354 mg, 2.00 mmol), methyl 3-bromo-5-iodobenzoate (**S6**) (1.02 g, 2.99 mmol), and Pd(PPh<sub>3</sub>)<sub>4</sub> (116 mg, 0.100 mmol) dissolved in toluene (8.0 mL) and EtOH (1.3 mL) was added aqueous Na<sub>2</sub>CO<sub>3</sub> (2.0 M, 8.0 mL) at room temperature. After stirring for 3 h at 80 °C, to the mixture was added water. The mixture was extracted with EtOAc. The combined organic extract was washed with brine and dried with Na<sub>2</sub>SO<sub>4</sub>. After filtration, the filtrate was concentrated under reduced pressure. The residue was purified by column chromatography (Biotage<sup>®</sup> ZIP sphere cartridge 45 g, *n*-hexane/EtOAc = 100/0 to 94/6) to give methyl 3-(4-(azidomethyl)phenyl)-5-bromobenzoate (**S7**) (585 mg, 1.69 mmol, 85%) as a colorless solid.

### Synthesis of methyl 3-(4-azido-3,5-diisopropylphenyl)-5-(4-(azidomethyl)phenyl)benzoate (**S9**)

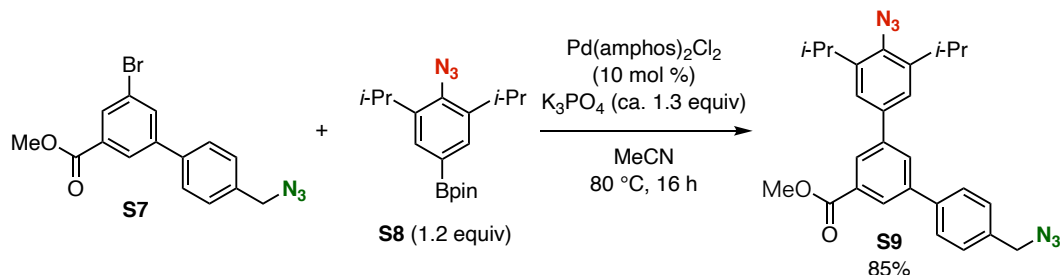

To a mixture of methyl 3-(4-(azidomethyl)phenyl)-5-bromobenzoate (**S7**) (82.6 mg, 0.239 mmol), 1-azido-2,6-diisopropyl-4-(4,4,5,5-tetramethyl-1,3,2-dioxaborolan-2-yl)benzene (**S8**) (94.4 mg, 0.287 mmol), Pd(amphos)<sub>2</sub>Cl<sub>2</sub> (16.9 mg, 0.0239 mmol), and tripotassium phosphate *n* hydrate (56.3 mg, ca. 0.3 mmol) was added MeCN (10 mL) and H<sub>2</sub>O (1.0 mL) at room temperature. After stirring for 1.5 h at 80 °C, to the mixture was added water. The mixture was extracted with EtOAc. The combined organic extract was washed with brine and dried with Na<sub>2</sub>SO<sub>4</sub>. After filtration, the filtrate was concentrated under reduced pressure. The residue was purified by column chromatography (Biotage<sup>®</sup> ZIP sphere cartridge 5 g, *n*-hexane/EtOAc = 100/0 to 95/5) to give methyl 3-(4-azido-3,5-diisopropylphenyl)-5-(4-(azidomethyl)phenyl)benzoate (**S9**) (94.8 mg, 0.202 mmol, 85%) as a pale yellow oil.

### Synthesis of 3-(4-azido-3,5-diisopropylphenyl)-5-(4-(azidomethyl)phenyl)benzyl alcohol (**S10**)

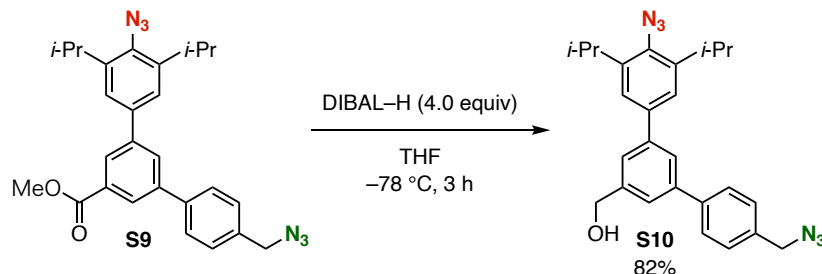

To a solution of methyl 3-(4-azido-3,5-diisopropylphenyl)-5-(4-(azidomethyl)phenyl)benzoate (**S9**) (114 mg, 0.243 mmol) dissolved in THF (1.5 mL) was slowly added diisobutylaluminum hydride (1.02 M in *n*-hexane, 950 μL, 0.972 mmol) at -78 °C. After stirring for 3 h at the same temperature, to the mixture was slowly added water, and then aqueous HCl (2 M). The mixture was extracted with EtOAc, and the combined organic extract was washed with brine, dried with Na<sub>2</sub>SO<sub>4</sub>. After filtration, the filtrate was concentrated under reduced pressure. The residue was purified by

column chromatography (Biotage<sup>®</sup> ZIP sphere cartridge 5 g, *n*-hexane/EtOAc = 100/0 to 75/25) to give 3-(4-azido-3,5-diisopropylphenyl)-5-(4-(azidomethyl)phenyl)benzyl alcohol (**S10**) (88.1 mg, 0.200 mmol, 82%) as a pale orange oil.

*Synthesis of N-(3-(4-azido-3,5-diisopropylphenyl)-5-(4-(azidomethyl)phenyl)benzyl)phthalimide (S11)*

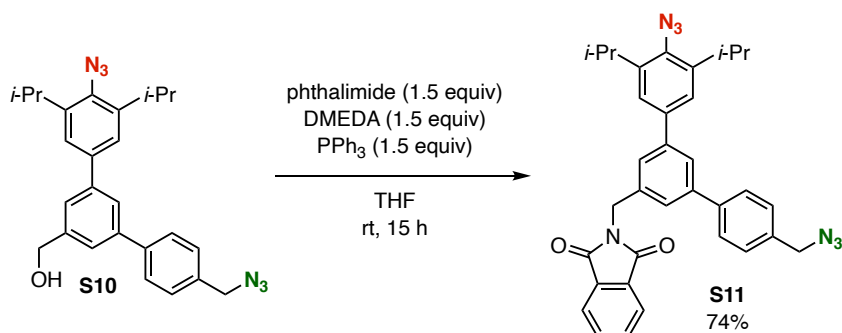

To a solution of 3-(4-azido-3,5-diisopropylphenyl)-5-(4-(azidomethyl)phenyl)benzyl alcohol (**S10**) (86.3 mg, 0.196 mmol), phthalimide (45.0 mg, 0.306 mmol), and bis(2-methoxyethyl) azodicarboxylate (DMEAD) (71.7 mg, 0.306 mmol) dissolved in THF (2.0 mL) was added PPh<sub>3</sub> (80.3 mg, 0.306 mmol) at room temperature. After stirring for 15 h at the same temperature, the mixture was concentrated under reduced pressure. The residue was purified by column chromatography (Biotage<sup>®</sup> ZIP sphere cartridge 5 g, *n*-hexane/EtOAc = 100/0 to 86/14) to give *N*-(3-(4-azido-3,5-diisopropylphenyl)-5-(4-(azidomethyl)phenyl)benzyl)phthalimide (**S11**) (83.3 mg, 0.146 mmol, 74%) as a pale orange oil.

*Synthesis of 3-azido-N-(3-(4-azido-3,5-diisopropylphenyl)-5-(4-(azidomethyl)phenyl)benzyl)-1-adamantanamide (16)*

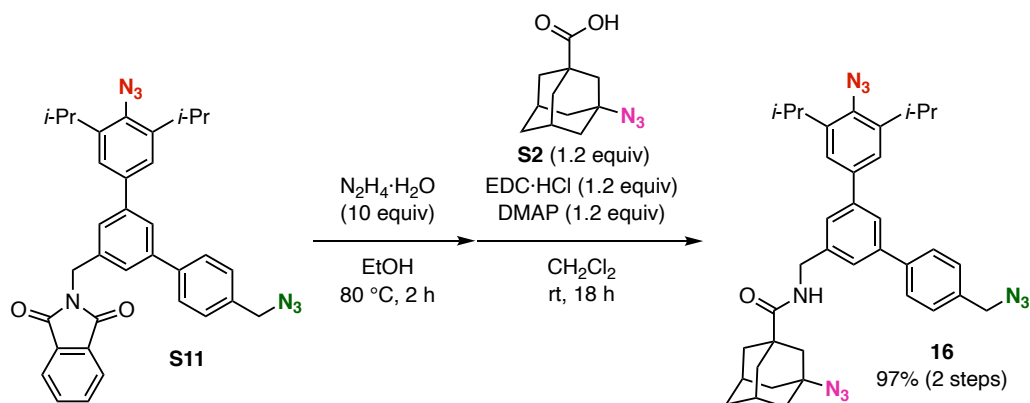

To a solution of *N*-(3-(4-azido-3,5-diisopropylphenyl)-5-(4-(azidomethyl)phenyl)benzyl)phthalimide (**S11**) (45.1 mg, 73.2 μmol) dissolved in EtOH (1.6 mL) was added hydrazine monohydrate (41.2 mg, 0.823 mmol) at room temperature. After stirring for 2 h at 80 °C, the mixture was concentrated under reduced pressure. After water was added to the residue, the mixture was extracted with EtOAc. The combined organic extract was washed with brine and dried with Na<sub>2</sub>SO<sub>4</sub>. After filtration, the filtrate was concentrated under reduced pressure. To the resulting mixture, 3-azido-1-adamantanecarboxylic acid (**S2**) (19.4 mg, 87.8 μmol), 1-ethyl-3-(3-(dimethylamino)propyl)carbodiimide hydrochloride (16.8 mg, 87.8 μmol), and 4-(dimethylamino)pyridine (10.7 mg, 87.8 μmol) was added CH<sub>2</sub>Cl<sub>2</sub> (1.5 mL) at room temperature. After stirring for 18 h at the same temperature, the mixture was concentrated under reduced pressure. The residue was purified by flash column chromatography (Biotage<sup>®</sup> ZIP-sphere cartridge 5 g, *n*-hexane/EtOAc = 100/0 to 75/25) to give 3-azido-*N*-(3-(4-azido-3,5-diisopropylphenyl)-5-(4-(azidomethyl)phenyl)benzyl)-1-adamantanamide (**16**) (45.5 mg, 70.8 μmol, 97%, in 2 steps) as a pale

brown solid.

### Synthesis of mono(triazole) **S12**

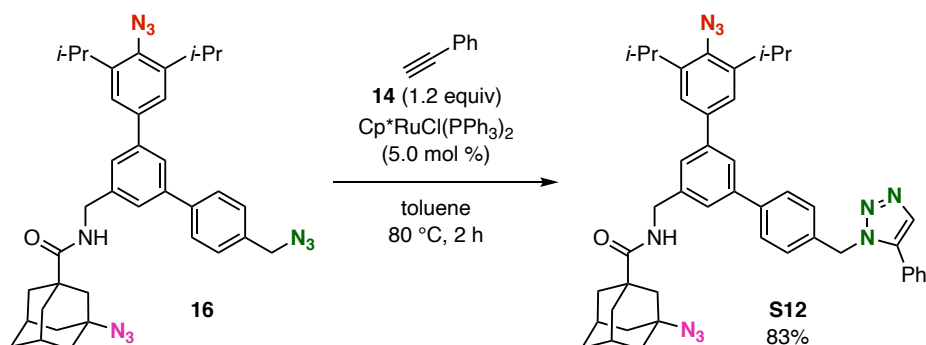

To a solution of platform **16** (32.1 mg, 50.0  $\mu\text{mol}$ ) dissolved in toluene (1.0 mL) was added phenylacetylene (**14**) (7.7 mg, 75  $\mu\text{mol}$ ) and (pentamethylcyclopentadienyl)bis(triphenylphosphine)ruthenium(II) chloride (1.99 mg, 2.50  $\mu\text{mol}$ ) at room temperature. After stirring for 2 h at 80 °C, the mixture was concentrated under reduced pressure. The residue was purified by preparative TLC ( $\text{CH}_2\text{Cl}_2/\text{MeOH} = 30/1$ ) to give mono(triazole) **S12** (30.8 mg, 41.3  $\mu\text{mol}$ , 83%) as a brown solid.

### Synthesis of bis(triazole) **S13**

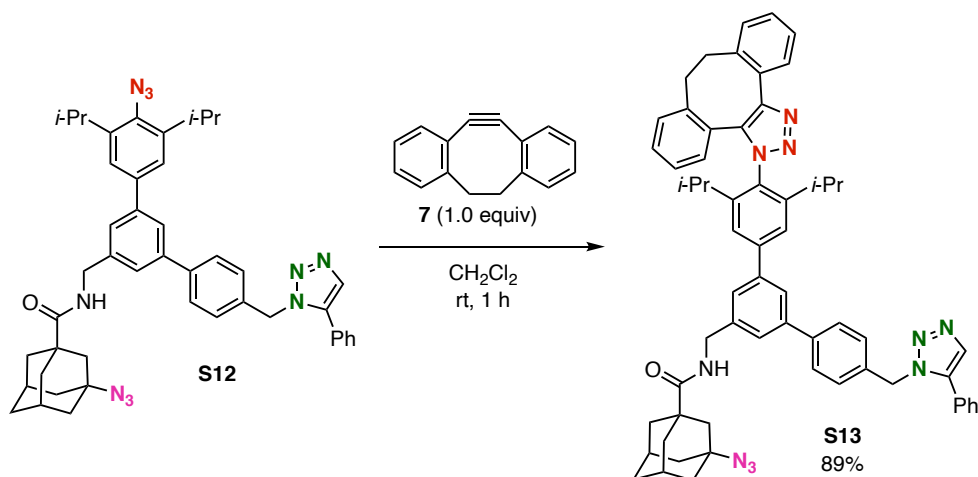

To a solution of mono(triazole) **S12** (20.3 mg, 27.3  $\mu\text{mol}$ ) dissolved in  $\text{CH}_2\text{Cl}_2$  (0.50 mL) was added 5,6-didehydro-11,12-dihydrodibenzo[*a,e*]cyclooctene (**7**) (5.06 mg, 24.8  $\mu\text{mol}$ ) at the room temperature. After stirring for 1 h at the same temperature, the mixture was concentrated under reduced pressure. The residue was purified by preparative TLC ( $n\text{-hexane}/\text{EtOAc} = 1/2$ ) to give bis(triazole) **S13** (20.9 mg, 22.0  $\mu\text{mol}$ , 89%) as a colorless solid.

## Synthesis of tris(triazole) **18**

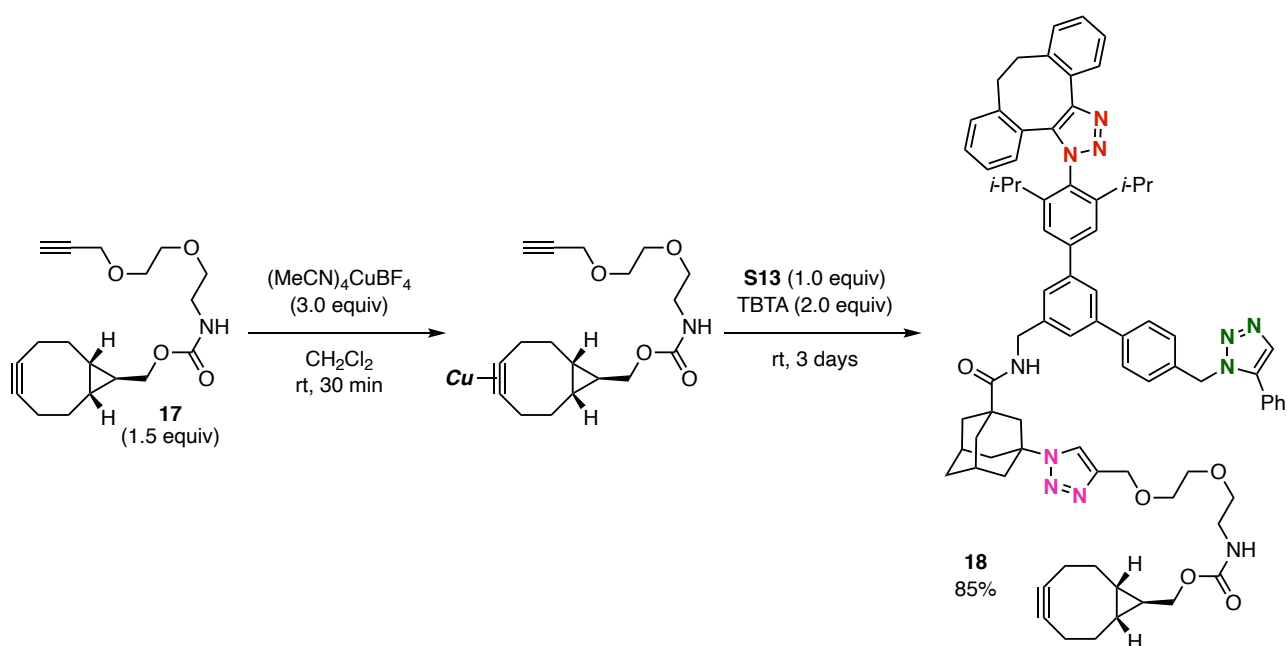

To a solution of (1 $\alpha$ ,8 $\alpha$ ,9 $\alpha$ )-bicyclo[6.1.0]non-4-yn-9-ylmethyl *N*-(2-(2-(propargyloxy)ethoxy)ethyl)carbamate (**17**) (3.38 mg, 10.6  $\mu$ mol) dissolved in CH<sub>2</sub>Cl<sub>2</sub> (0.50 mL) was added tetrakis(acetonitrile)copper(I) tetrafluoroborate (6.61 mg, 21.0  $\mu$ mol) at room temperature. After stirring for 30 min at the same temperature, to the mixture was added bis(triazole) **S13** (6.40 mg, 6.74  $\mu$ mol) dissolved in CH<sub>2</sub>Cl<sub>2</sub> (0.50 mL) and TBTA (7.46 mg, 14.1  $\mu$ mol). After stirring for 3 days, to the mixture was added aqueous EDTA·2Na (0.1 M, 8.4 mL). After stirring for 24 h, the mixture was extracted with CH<sub>2</sub>Cl<sub>2</sub> and dried with Na<sub>2</sub>SO<sub>4</sub>. After filtration, the filtrate was concentrated under reduced pressure. The residue was purified by preparative TLC (CH<sub>2</sub>Cl<sub>2</sub>/MeOH = 20/1) and then preparative TLC (CH<sub>2</sub>Cl<sub>2</sub>/MeOH = 20/1) to give tris(triazole) **18** (7.29 mg, 5.75  $\mu$ mol, 85%) as a colorless solid.

## Synthesis of methyl 3-(3-azido-5-(azidomethyl)phenyl)-5-bromobenzoate (**S15**)

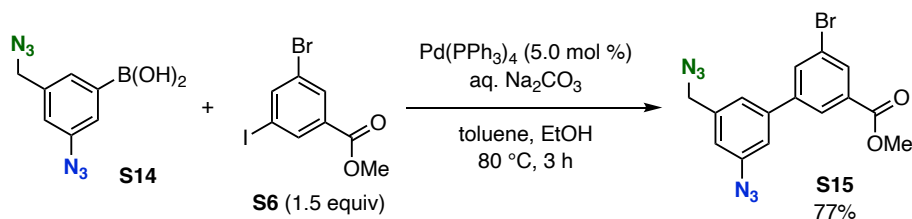

To a solution of methyl 3-bromo-5-iodobenzoate (**S6**) (1.40 g, 4.10 mmol) dissolved in toluene (12 mL) and EtOH (2.0 mL) was added Pd(PPh<sub>3</sub>)<sub>4</sub> (159 mg, 0.138 mmol), aqueous Na<sub>2</sub>CO<sub>3</sub> (1.6 M, 15.0 mL), and 3-azido-5-(azidomethyl)phenylboronic acid (**S14**) (597 mg, 2.74 mmol) at room temperature. After stirring for 3 h at 80 °C, to the mixture was added water. The mixture was extracted with EtOAc. The combined organic extract was washed with brine and dried with Na<sub>2</sub>SO<sub>4</sub>. After filtration, the filtrate was concentrated under reduced pressure. The residue was purified by column chromatography (Biotage<sup>®</sup> ZIP-sphere cartridge 120 g, *n*-hexane/CH<sub>2</sub>Cl<sub>2</sub> = 58/42) to give methyl 3-(3-azido-5-(azidomethyl)phenyl)-5-bromobenzoate (**S15**) (813 mg, 2.10 mmol, 77%) as a brown solid.

*Synthesis of methyl 3-(3-azido-5-(azidomethyl)phenyl)-5-(4-azido-3,5-diisopropylphenyl)benzoate (S16)*

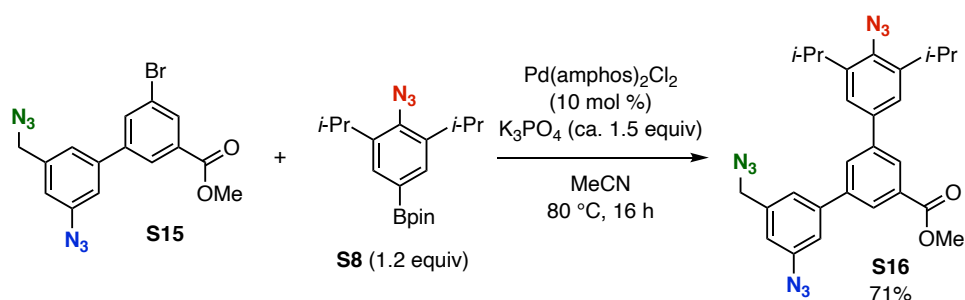

To a mixture of methyl 3-(3-azido-5-(azidomethyl)phenyl)-5-bromobenzoate (**S15**) (1.61 g, 4.16 mmol), 1-azido-2,6-diisopropyl-4-(4,4,5,5-tetramethyl-1,3,2-dioxaborolan-2-yl)benzene (**S8**) (1.65 g, 5.01 mmol),  $\text{Pd}(\text{amphos})_2\text{Cl}_2$  (296 mg, 0.417 mmol), and tripotassium phosphate *n* hydrate (1.23 g, ca. 6 mmol) was added MeCN (16 mL) and  $\text{H}_2\text{O}$  (1.6 mL) at room temperature. After stirring for 16 h at 80 °C, to the mixture was added water. The mixture was extracted with EtOAc. The combined organic extract was washed with brine and dried with  $\text{Na}_2\text{SO}_4$ . After filtration, the filtrate was concentrated under reduced pressure. The residue was purified by column chromatography (Biotage<sup>®</sup> ZIP-sphere cartridge 30 g, *n*-hexane/ $\text{CH}_2\text{Cl}_2$  = 59/41 to 0/100) to give methyl 3-(3-azido-5-(azidomethyl)phenyl)-5-(4-azido-3,5-diisopropylphenyl)benzoate (**S16**) (1.50 g, 2.95 mmol, 71%) as a brown oil.

*Synthesis of 3-(3-azido-5-(azidomethyl)phenyl)-5-(4-azido-3,5-diisopropylphenyl)benzyl alcohol (S17)*

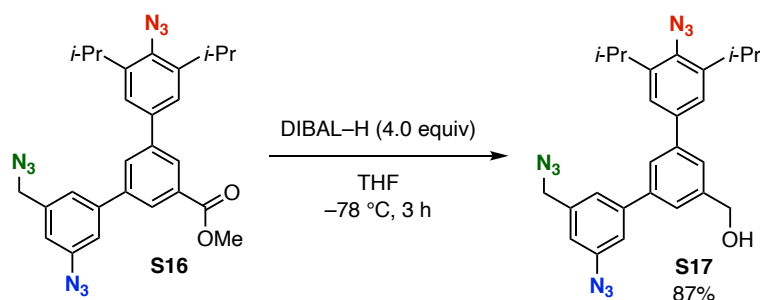

To a solution of methyl 3-(3-azido-5-(azidomethyl)phenyl)-5-(4-azido-3,5-diisopropylphenyl)benzoate (**S16**) (12.7 mg, 24.9  $\mu\text{mol}$ ) dissolved in THF (0.15 mL) was slowly added diisobutylaluminum hydride (1.02 M in *n*-hexane, 100  $\mu\text{L}$ , 102  $\mu\text{mol}$ ) at -78 °C. After stirring for 3 h at the same temperature, to the mixture was slowly added water. The mixture was extracted with EtOAc. The combined organic extract was washed with brine and dried with  $\text{Na}_2\text{SO}_4$ . After filtration, the filtrate was concentrated under reduced pressure. The residue was purified by column chromatography (Biotage<sup>®</sup> ZIP-sphere cartridge 5 g, *n*-hexane/EtOAc = 77/23) to give 3-(3-azido-5-(azidomethyl)phenyl)-5-(4-azido-3,5-diisopropylphenyl)benzyl alcohol (**S17**) (10.4 mg, 21.6  $\mu\text{mol}$ , 87 %) as a brown oil.

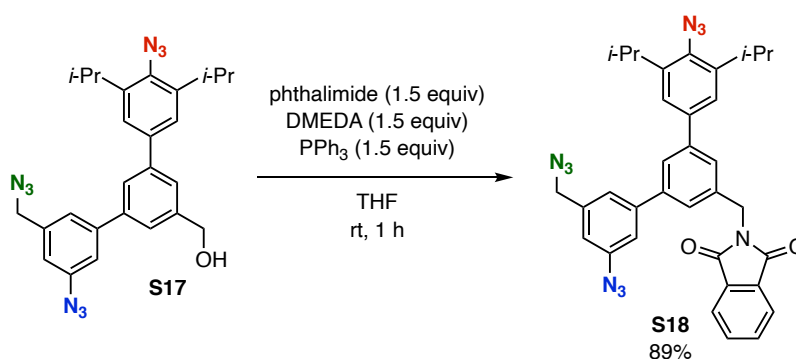

To a solution of 3-(3-azido-5-(azidomethyl)phenyl)-5-(4-azido-3,5-diisopropylphenyl)benzyl alcohol (**S17**) (278 mg, 0.576 mmol), phthalimide (128 mg, 0.867 mmol), and dis(2-methoxyethyl) azodicarboxylate (DMEAD) (206 mg, 0.877 mmol) dissolved in THF (6.0 mL) was added PPh<sub>3</sub> (222 mg, 0.846 mmol) at room temperature. After stirring for 1 h at the same temperature, the mixture was concentrated under reduced pressure. The residue was purified by column chromatography (Biotage<sup>®</sup> ZIP-sphere cartridge 45 g, *n*-hexane/EtOAc = 87/13 to 66/34) to give *N*-(3-(3-azido-5-(azidomethyl)phenyl)-5-(4-azido-3,5-diisopropylphenyl)benzyl)phthalimide (**S18**) (313 mg, 0.513 mmol, 89%) as a pale brown solid.

Synthesis of 3-(3-azido-5-(azidomethyl)phenyl)-5-(4-azido-3,5-diisopropylphenyl)benzylamine (**S19**)

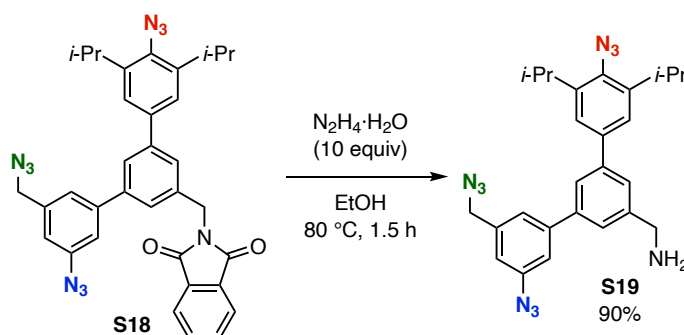

To a solution of *N*-(3-(3-azido-5-(azidomethyl)phenyl)-5-(4-azido-3,5-diisopropylphenyl)benzyl)phthalimide (**S18**) (1.00 g, 1.64 mmol) dissolved in EtOH (38 mL) was added hydrazine monohydrate (821 mg, 821 mmol) at room temperature. After stirring for 1.5 h at 80 °C, the mixture was concentrated under reduced pressure. After water was added to the residue, the mixture was extracted with EtOAc. The combined organic extract was washed with brine and dried with Na<sub>2</sub>SO<sub>4</sub>. After filtration, the filtrate was concentrated under reduced pressure. The residue was purified by flash column chromatography (Biotage<sup>®</sup> ZIP-sphere cartridge 45 g, CH<sub>2</sub>Cl<sub>2</sub>/MeOH = 95/5 to 87/13) to give 3-(3-azido-5-(azidomethyl)phenyl)-5-(4-azido-3,5-diisopropylphenyl)benzylamine (**S19**) (708 mg, 1.47 mmol, 90%) as a brown oil.

Synthesis of 3-azido-*N*-(3-(3-azido-5-(azidomethyl)phenyl)-5-(4-azido-3,5-diisopropylphenyl)benzyl)-1-adamantanamide (**19**)

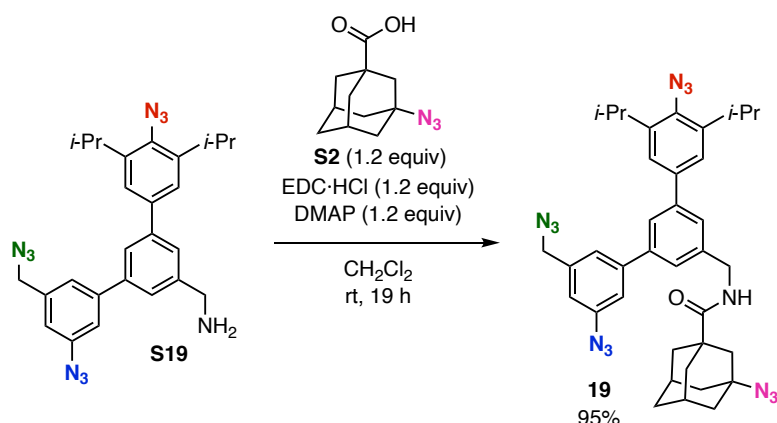

To a mixture of 3-(3-azido-5-(azidomethyl)phenyl)-5-(4-azido-3,5-diisopropylphenyl)benzyl amine (**S19**) (631 mg, 1.31 mmol), 3-azido-1-adamantanecarboxylic acid (**S2**) (350 mg, 1.58 mmol), 1-ethyl-3-(3-(dimethylamino)propyl)carbodiimide hydrochloride (304 mg, 1.58 mmol), and 4-(dimethylamino)pyridine (192 mg, 1.57 mmol) was added CH<sub>2</sub>Cl<sub>2</sub> (13 mL) at room temperature. After stirring for 19 h at the same temperature, the mixture was concentrated under reduced pressure. The residue was purified by flash column chromatography (Biotage<sup>®</sup> ZIP-sphere cartridge 45 g, *n*-hexane/EtOAc = 75/25 to 54/46) to give 3-azido-*N*-(3-(3-azido-5-(azidomethyl)phenyl)-5-(4-azido-3,5-diisopropylphenyl)benzyl)-1-adamantanamide (**19**) (855 mg, 1.25 mmol, 95%) as a pale yellow solid.

Synthesis of mono(triazole) **S20**

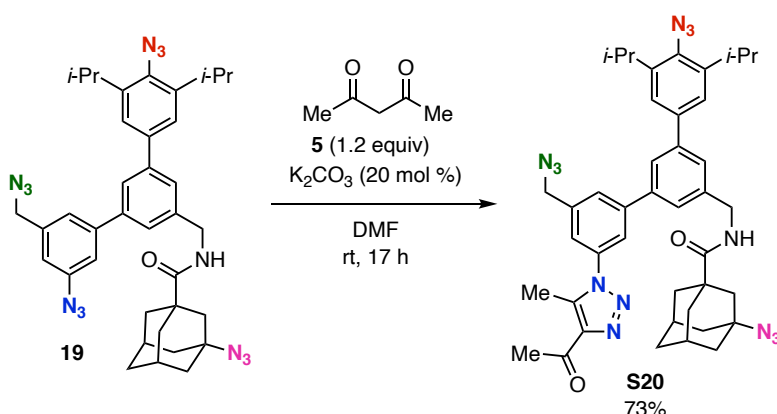

To a mixture of platform **19** (68.4 mg, 0.100 mmol), and acetylacetone (**5**) (11.9 mg, 0.119 mmol) dissolved in DMF (1.0 mL) was added K<sub>2</sub>CO<sub>3</sub> (2.8 mg, 20 μmol) at room temperature. After stirring for 17 h at the same temperature, to the mixture was added water. The mixture was extracted with EtOAc. The combined organic extract was washed with brine and dried with Na<sub>2</sub>SO<sub>4</sub>. After filtration, the filtrate was concentrated under reduced pressure. The residue was purified by column chromatography (Biotage<sup>®</sup> ZIP-sphere cartridge 10 g, *n*-hexane/EtOAc = 67/33 to 46/54) to give mono(triazole) **S20** (56.2 mg, 73.4 μmol, 73%) as an orange solid.



### Synthesis of bis(triazole) **S21**

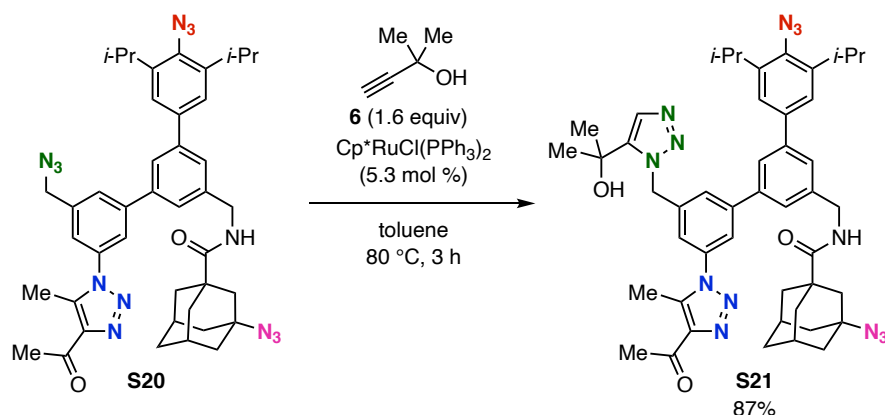

To a solution of mono(triazole) **S20** (51.2 mg, 66.8  $\mu\text{mol}$ ) dissolved in toluene (1.0 mL) was added 2-methyl-3-butyn-2-ol (**6**) (9.1 mg, 0.11 mmol) and (pentamethylcyclopentadienyl)bis(triphenylphosphine)ruthenium(II) chloride (2.8 mg, 3.5  $\mu\text{mol}$ ) at room temperature. After stirring for 3 h at 80 °C, the mixture was concentrated under reduced pressure. The residue was purified by column chromatography (Biotage<sup>®</sup> ZIP-sphere cartridge 10 g, CH<sub>2</sub>Cl<sub>2</sub>/EtOAc = 55/45 to 0/100) to give bis(triazole) **S21** (49.3 mg, 58.0  $\mu\text{mol}$ , 87%) as a brown solid.

### Synthesis of tris(triazole) **S22**

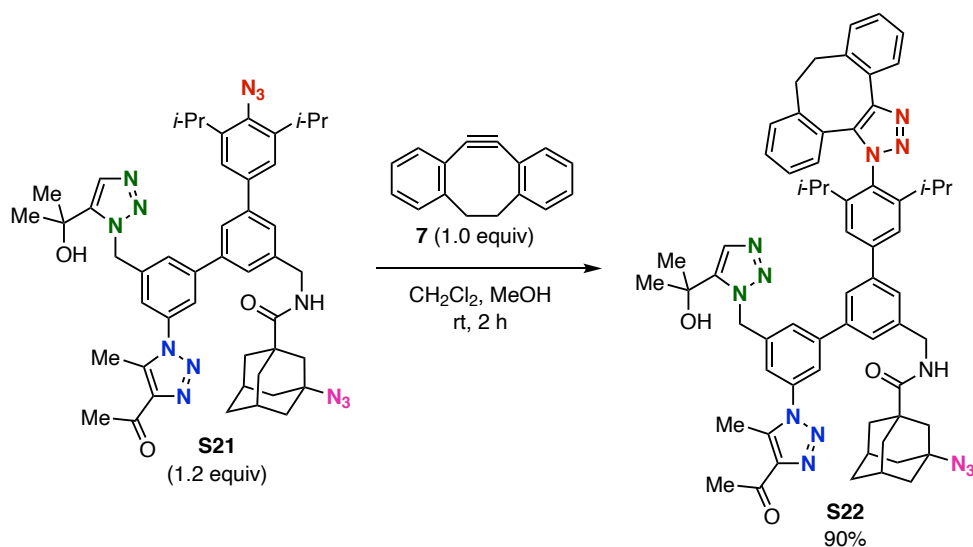

To a mixture of bis(triazole) **S21** (41.7 mg, 49.1  $\mu\text{mol}$ , 1.19 equiv), and 5,6-didehydro-11,12-dihydrodibenzo[*a,e*]cyclooctene (**7**) (8.4 mg, 41  $\mu\text{mol}$ ) was added CH<sub>2</sub>Cl<sub>2</sub> (0.50 mL), and MeOH (0.50 mL) at room temperature. After stirring for 2 h at the same temperature, the mixture was concentrated under reduced pressure. The residue was purified by preparative TLC (CH<sub>2</sub>Cl<sub>2</sub>/MeOH = 29/1), preparative TLC (CH<sub>2</sub>Cl<sub>2</sub>/MeOH = 19/1), and then preparative TLC (CH<sub>2</sub>Cl<sub>2</sub>/acetone = 6/4) to give tris(triazole) **S22** (39.2 mg, 37.2  $\mu\text{mol}$ , 90%) as a colorless solid.



## Synthesis of tetrakis(triazole) **21**

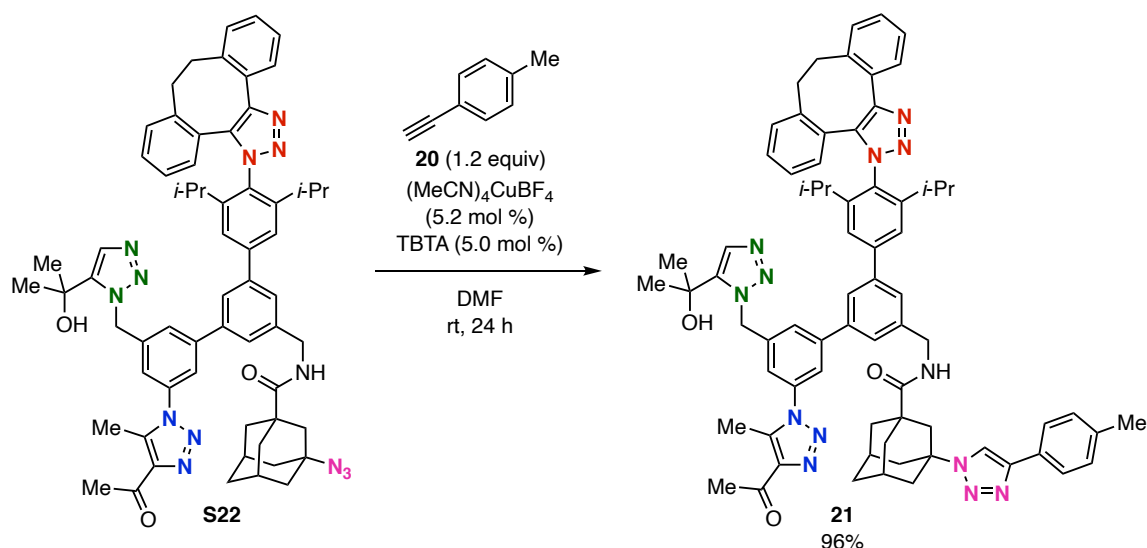

To a mixture of tris(triazole) **S22** (14.7 mg, 13.9  $\mu\text{mol}$ ) and 4-ethynyltoluene (**20**) (2.0 mg, 17  $\mu\text{mol}$ ) dissolved in DMF (60  $\mu\text{L}$ ) was added tetrakis(acetonitrile)copper(I) tetrafluoroborate (0.23 mg, 0.73  $\mu\text{mol}$ ) and TBTA (0.37 mg, 0.70  $\mu\text{mol}$ ) dissolved in DMF (140  $\mu\text{L}$ ) at the room temperature. After stirring for 24 h at the same temperature, to the mixture was added water. The mixture was extracted with EtOAc. The combined organic extract was washed with brine and dried with  $\text{Na}_2\text{SO}_4$ . After filtration, the filtrate was concentrated under reduced pressure. The residue was purified by column chromatography (Biotage<sup>®</sup> ZIP-sphere cartridge 10 g, *n*-hexane/EtOAc = 8/92 to 0/100) to give tetrakis(triazole) **21** (15.7 mg, 13.4  $\mu\text{mol}$ , 96%) as a colorless solid.

## Synthesis of *N*-(5,11-bis(((1,3-dihydroxypropan-2-yl)oxy)methyl)-1,15-dihydroxy-2,14-bis(hydroxymethyl)-3,6,10,13-tetraoxapentadecan-8-yl)-4-ethynylbenzamide (**25**)

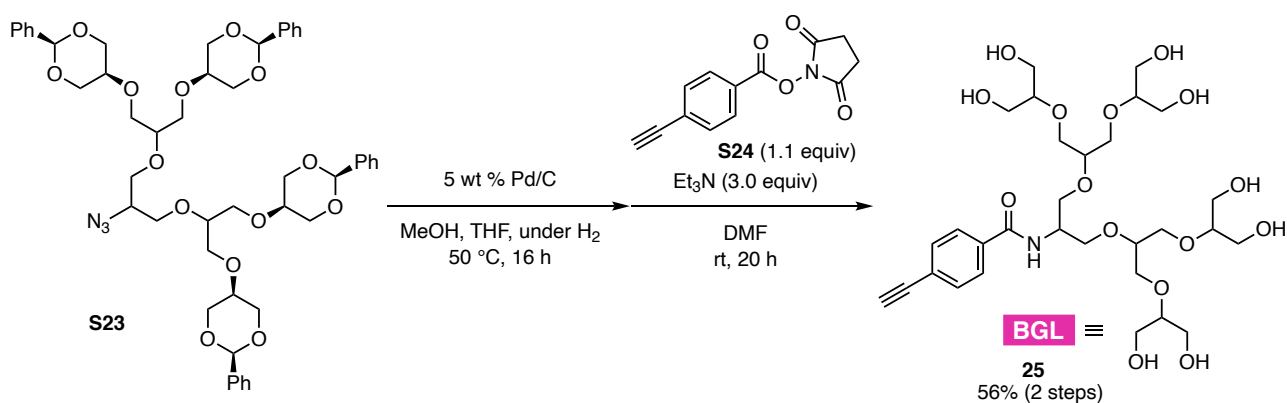

To a mixture of azide **S23** (67.0 mg, 73.3  $\mu\text{mol}$ ) and 5 wt % Pd/C (wetted with ca. 50 % water) (239 mg) was added methanol (6.0 mL) and THF (3.0 mL) at room temperature. After stirring for 16 h at 50  $^\circ\text{C}$  under a hydrogen atmosphere, the mixture was filtered with celite, and the filtrate was concentrated under reduced pressure. To the residue was added *N*-succinimidyl 4-ethynylbenzoate (**S24**) (20.0 mg, 82.2  $\mu\text{mol}$ ), triethylamine (22.3 mg, 220  $\mu\text{mol}$ ), and DMF (3.0 mL) at room temperature. After stirring for 20 h at the same temperature, the mixture was concentrated under reduced pressure. The residue was purified by column chromatography (CHROMATOREX Q-PACK ODS30 SIZE10, water/MeCN = 9/1) to give *N*-(5,11-bis(((1,3-dihydroxypropan-2-yl)oxy)methyl)-1,15-dihydroxy-2,14-bis(hydroxymethyl)-3,6,10,13-tetraoxapentadecan-8-yl)-4-ethynylbenzamide (**25**) (27.1 mg, 40.8  $\mu\text{mol}$ , 56% in 2 steps) as colorless oil.

## Synthesis of platform-HTL conjugate **S25**

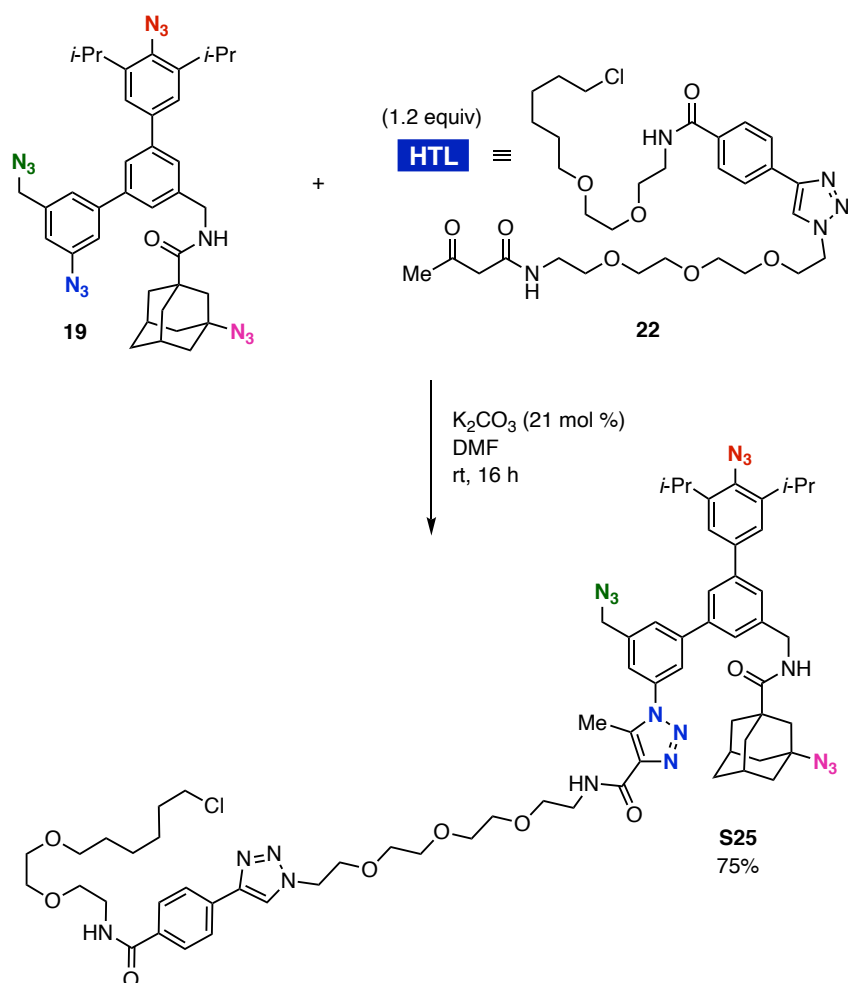

To a mixture of platform **19** (103 mg, 0.150 mmol) and  $\beta$ -ketoamide **22** (118 mg, 0.181 mmol) dissolved in DMF (1.0 mL) was added  $K_2CO_3$  (4.3 mg, 31  $\mu$ mol) at room temperature. After stirring for 16 h at the same temperature, to the mixture was added water. The mixture was extracted with EtOAc. The combined organic extract was washed with brine and dried with  $Na_2SO_4$ . After filtration, the filtrate was concentrated under reduced pressure. The residue was purified by column chromatography (Biotage<sup>®</sup> ZIP-sphere cartridge 10 g, EtOAc/MeOH = 100/0 to 94/6) to give platform-HTL conjugate **S25** (148 mg, 0.112 mmol, 75%) as a pale brown solid.

Synthesis of platform-HTL-BODIPY conjugate **S26**

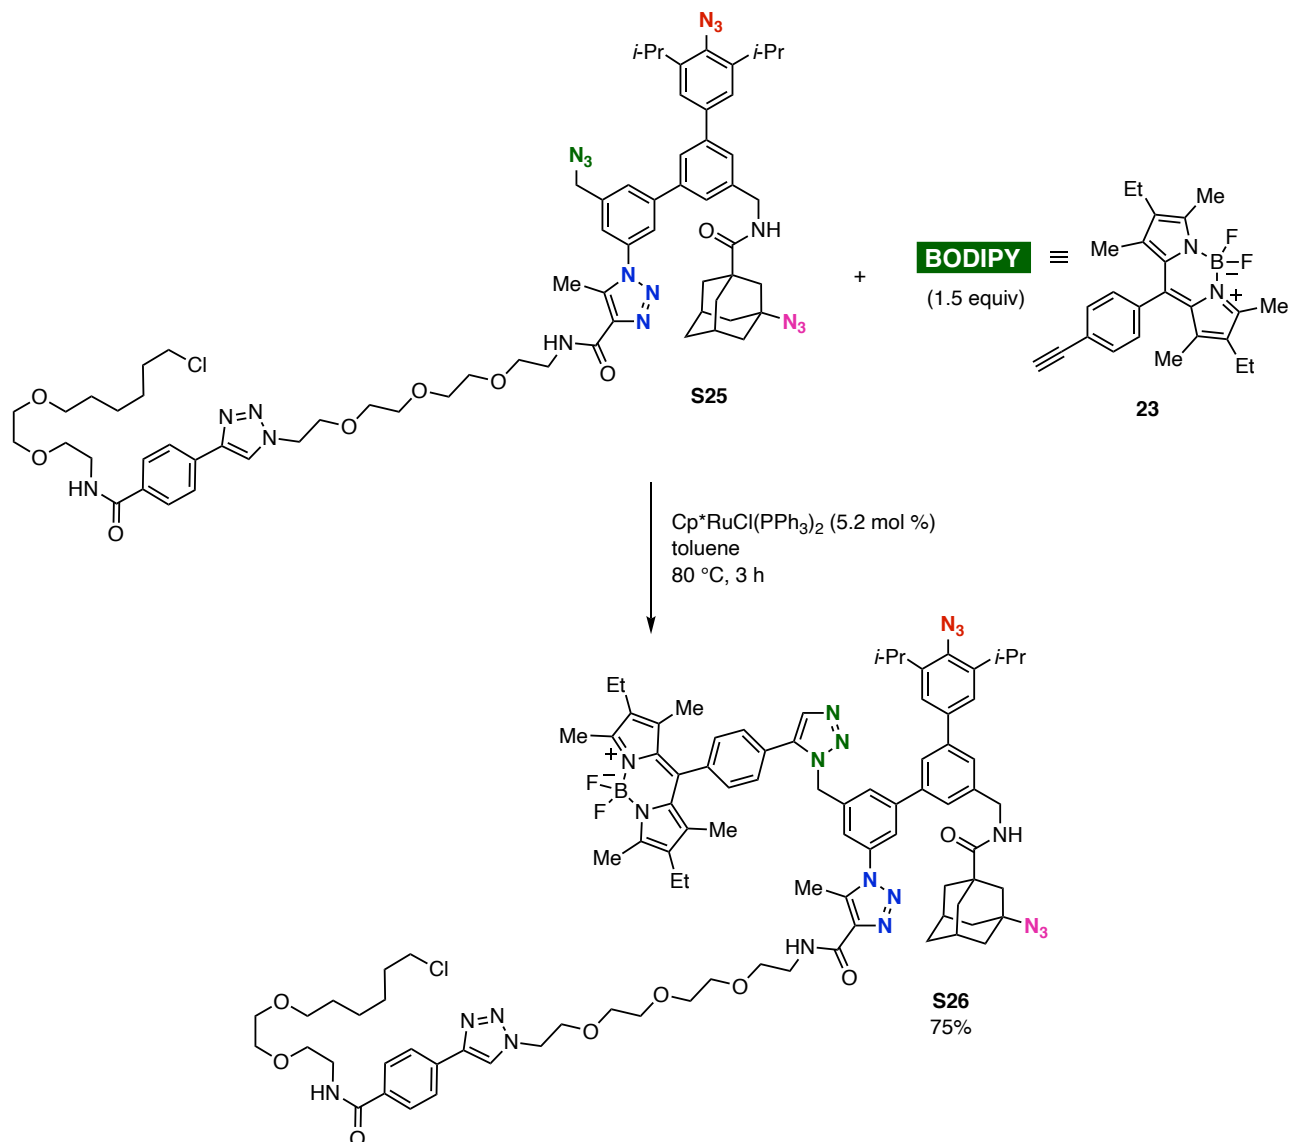

To a mixture of platform-HTL conjugate **S25** (51.1 mg, 38.7  $\mu\text{mol}$ ), alkyne **23** (23.5 mg, 58.1  $\mu\text{mol}$ ), and (pentamethylcyclopentadienyl)bis(triphenylphosphine)ruthenium(II) chloride (1.6 mg, 2.0  $\mu\text{mol}$ ) was added toluene (0.50 mL) at room temperature. After stirring for 1.5 h at 80 °C, the mixture was concentrated under reduced pressure. The residue was purified by column chromatography (Biotage<sup>®</sup> ZIP-sphere cartridge 10 g, EtOAc/MeOH = 100/0 to 90/10) to give platform-HTL-BODIPY conjugate **S26** (49.8 mg, 28.9  $\mu\text{mol}$ , 75%) as a red solid.

## Synthesis of platform-HTL-BODIPY-biotin conjugate **26**

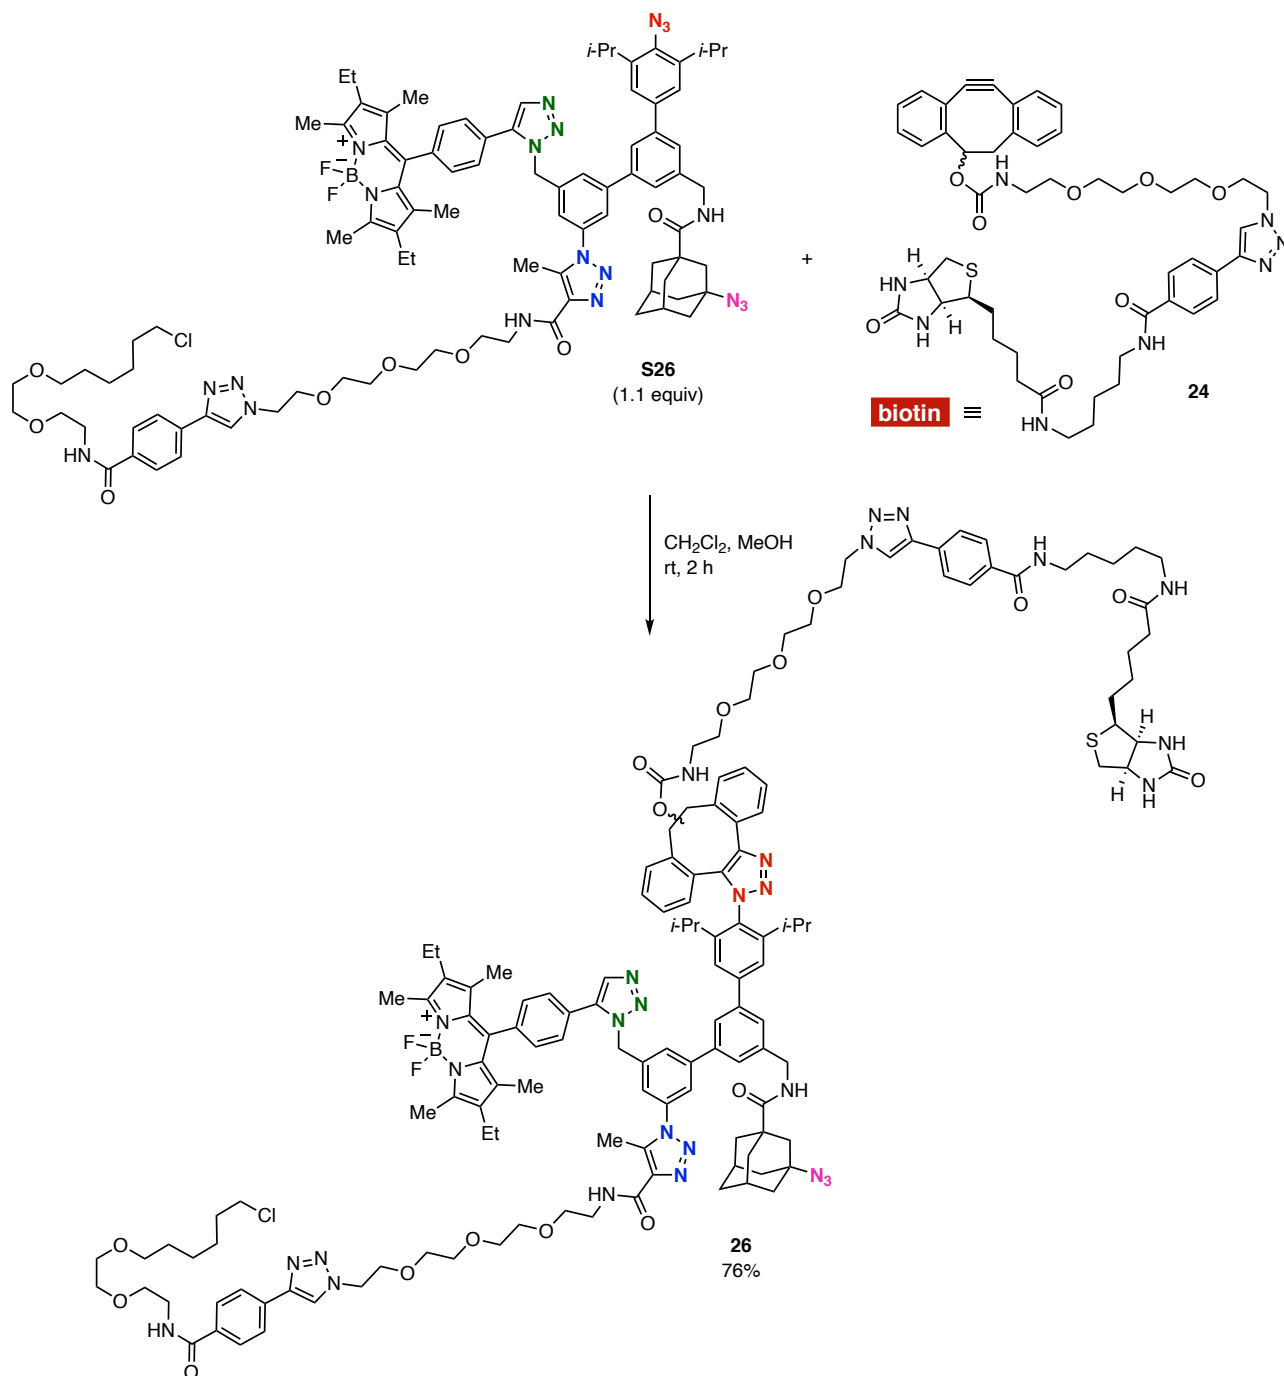

To a solution of platform-HTL-BODIPY conjugate **S26** (10.9 mg, 6.32  $\mu$ mol) dissolved in  $CH_2Cl_2$  (0.15 mL) and MeOH (0.15 mL) was added cycloalkyne **24** (5.16 mg, 5.60  $\mu$ mol) dissolved in  $CH_2Cl_2$  (0.10 mL) and MeOH (0.10 mL) at room temperature. After stirring for 2 h at the same temperature, the mixture was concentrated under reduced pressure. The residue was purified by column chromatography (silica-gel 700 mg,  $CH_2Cl_2$ /acetone = 50/50, then  $CH_2Cl_2$ /MeOH = 90/10) to give platform-HTL-BODIPY-biotin conjugate **26** (11.3 mg, 4.27  $\mu$ mol, 76%) as a red solid.

Synthesis of platform-HTL-BODIPY-biotin-BGL conjugate **27**

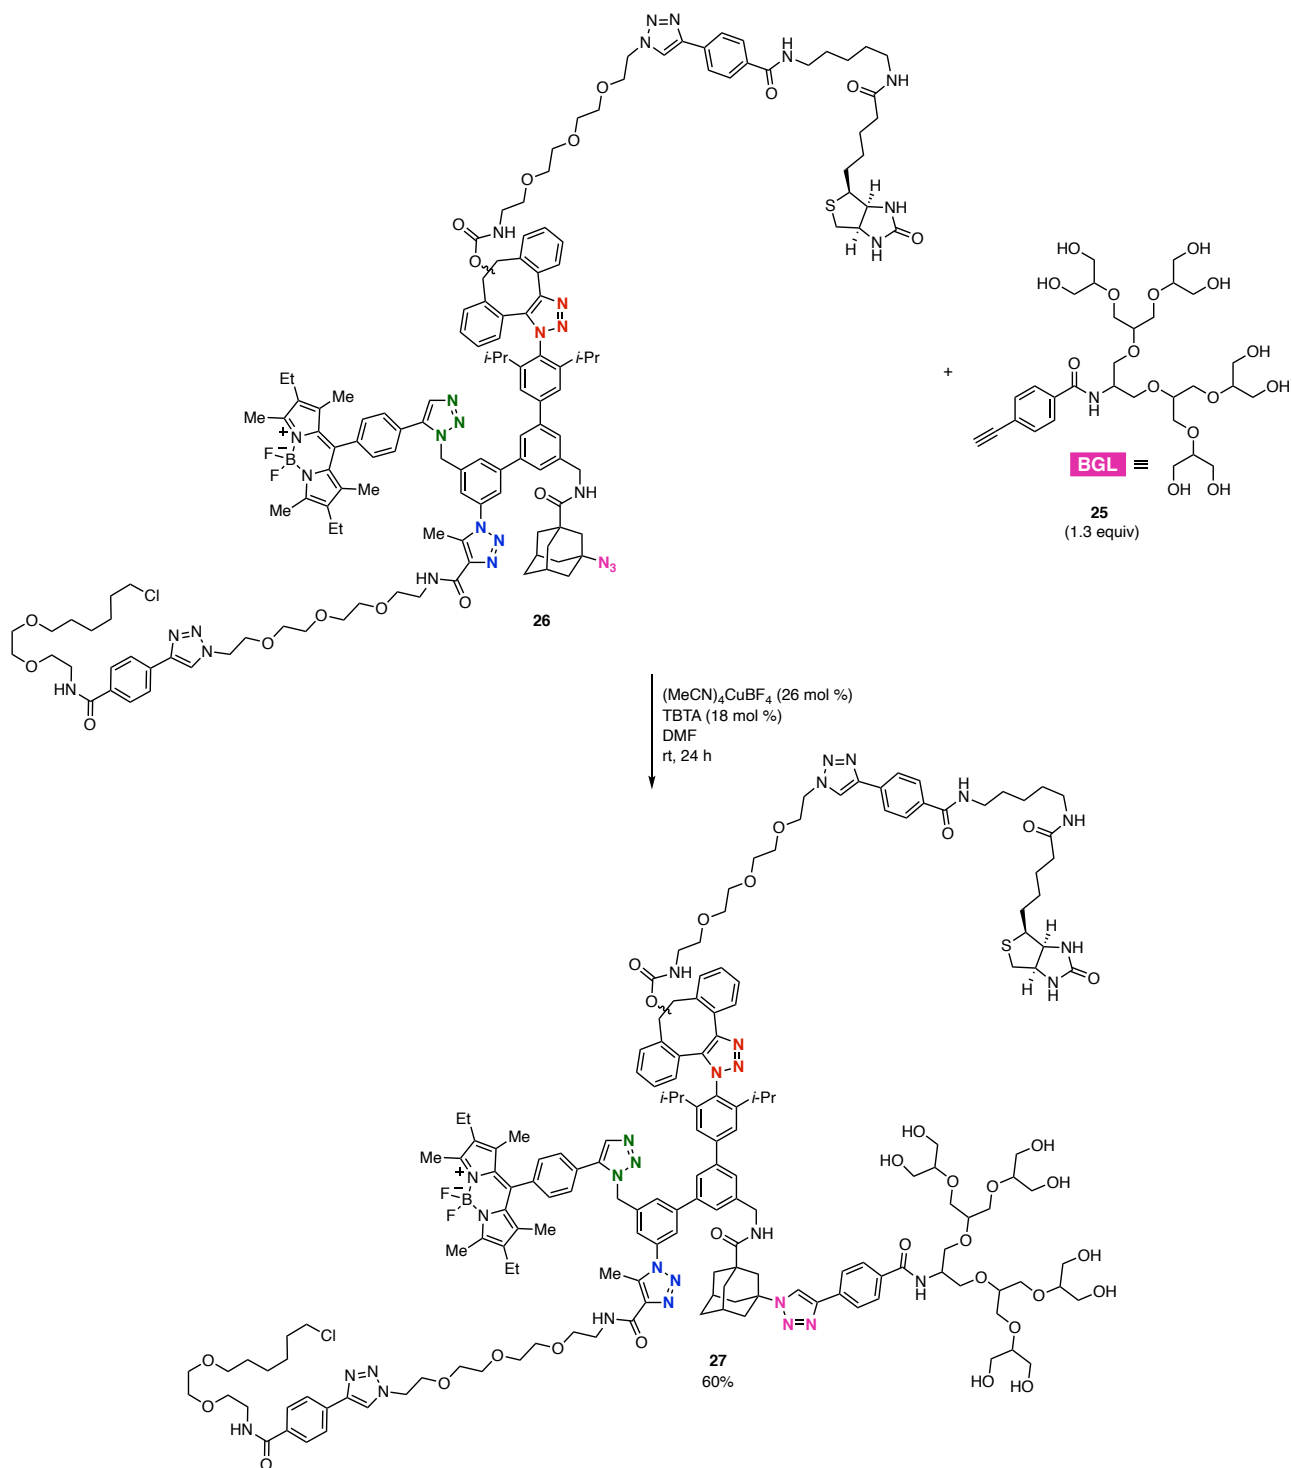

To a mixture of platform-HTL-BODIPY-biotin conjugate **26** (6.80 mg, 2.57  $\mu\text{mol}$ ), tetrakis(acetonitrile)copper(I) tetrafluoroborate (0.21 mg, 0.67  $\mu\text{mol}$ ), and TBTA (0.24 mg, 0.45  $\mu\text{mol}$ ) was added alkyne **25** (2.17 mg, 3.27  $\mu\text{mol}$ ) and DMF (0.10 mL) at room temperature. After stirring for 18 h at the same temperature, the mixture was concentrated under reduced pressure. The residue was purified by column chromatography (silica-gel 700 mg,  $\text{CH}_2\text{Cl}_2/\text{MeOH} = 100/0$  to  $0/100$ ) to give platform-HTL-BODIPY-biotin-BGL conjugate **27** (5.1 mg, 1.5  $\mu\text{mol}$ , 60%) as a red solid.

Synthesis of platform-HTL-BODIPY-biotin-Alexa Fluor 555 conjugate **28**

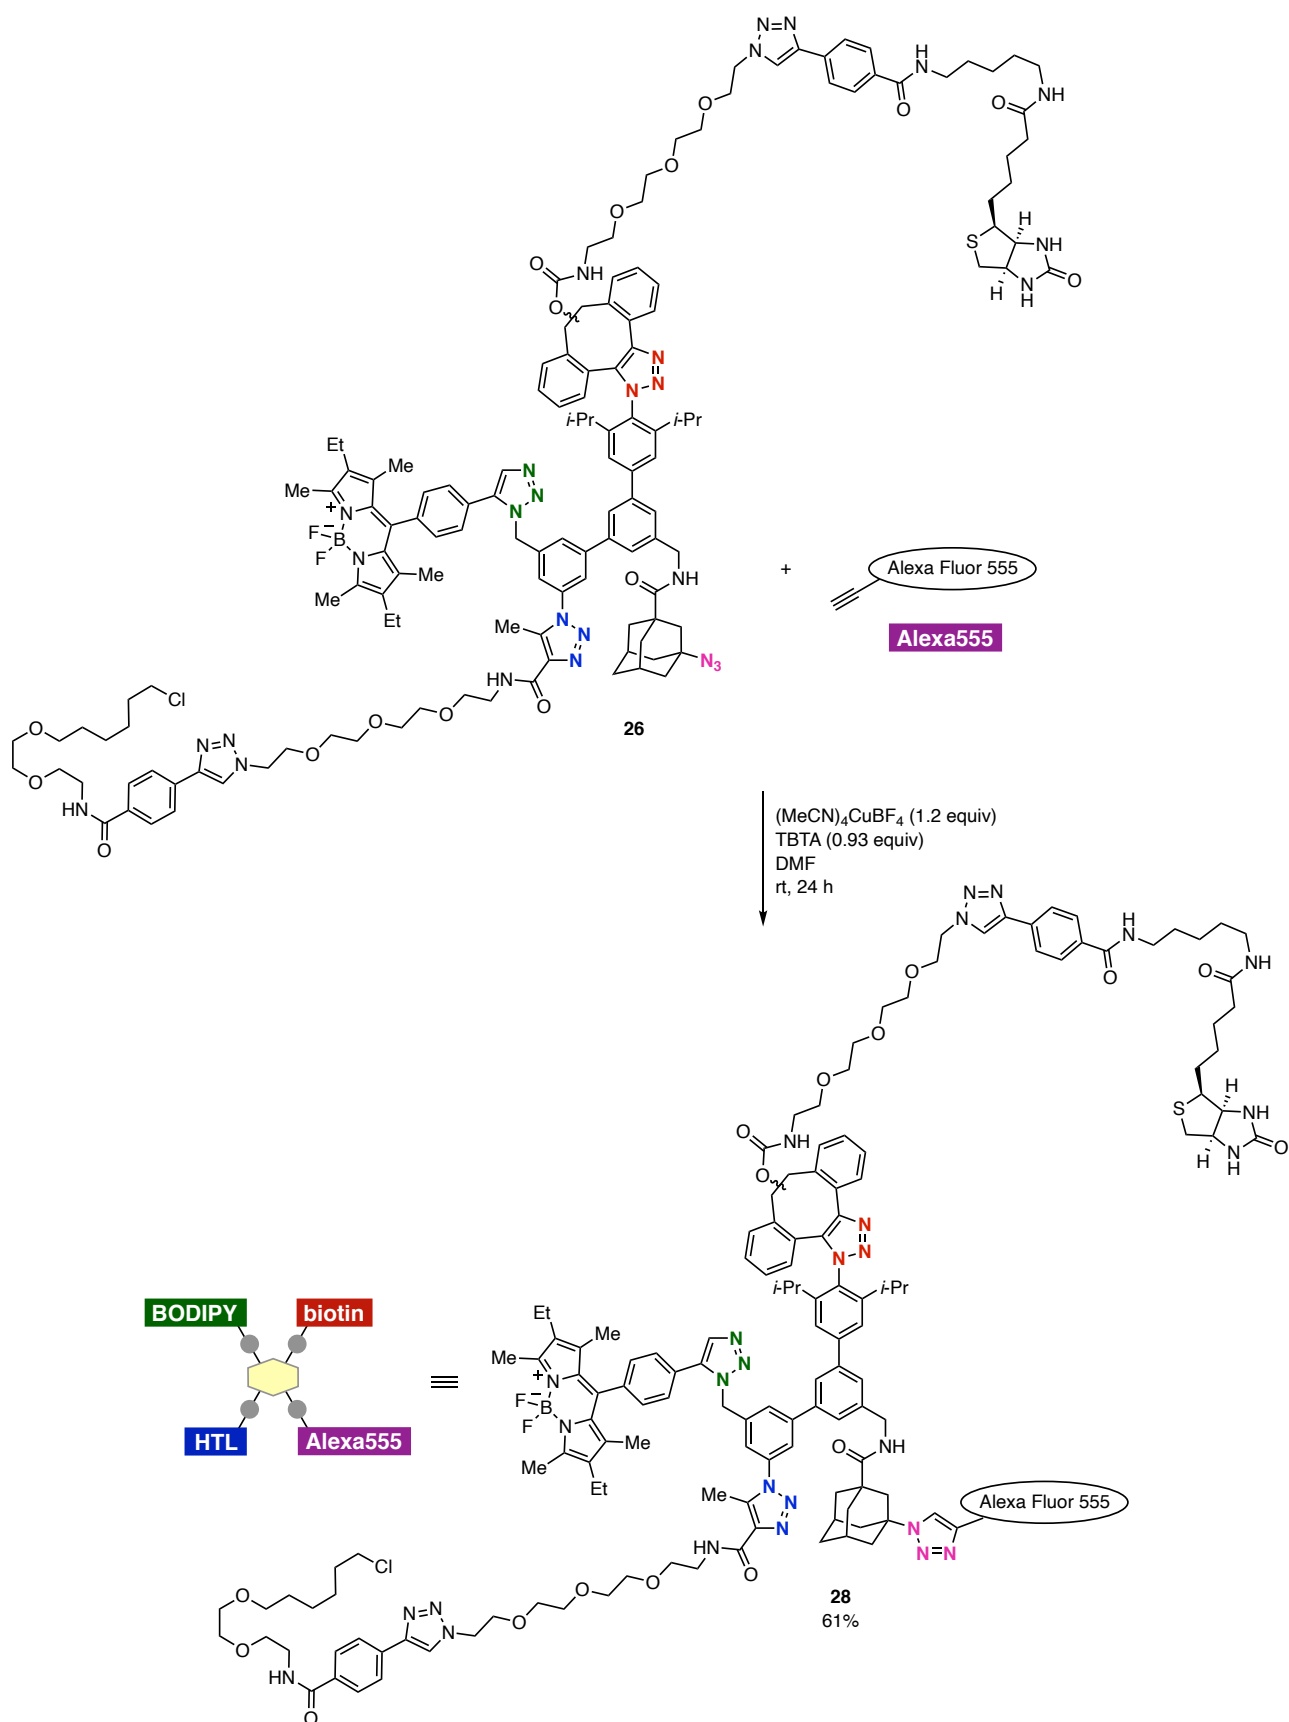

To a mixture of platform-HTL-BODIPY-biotin conjugate **26** (1.65 mg, 0.624  $\mu\text{mol}$ ), tetrakis(acetonitrile)copper(I) tetrafluoroborate (0.23 mg, 0.73  $\mu\text{mol}$ ), and TBTA (0.31 mg, 0.58

$\mu\text{mol}$ ) was added Alexa Fluor™ 555 alkyne triethylammonium salt (MW =  $\sim 750$ , 0.5 mg, ca. 0.7  $\mu\text{mol}$ ) dissolved in DMF (0.10 mL) at room temperature. After stirring for 18 h at the same temperature, the mixture was concentrated under reduced pressure. The residue was purified by column chromatography (silica-gel 500 mg,  $\text{CH}_2\text{Cl}_2$  to  $\text{CH}_2\text{Cl}_2/\text{MeOH} = 4/1$ ) and then column chromatography (CHROMATOREX ODS-DM1020T 100-200 mesh 500 mg,  $\text{H}_2\text{O}/\text{MeOH} = 1/2$  to MeOH) to give platform-HTL-BODIPY-biotin-Alexa555 conjugate **28** (MW =  $\sim 3400$ , 1.3 mg, 0.38  $\mu\text{mol}$ , 61%) as a red solid.

## Biological Experiments

### *Production of recombinant GST-HaloTag protein in E. coli*

*Escherichia coli* strain Rosetta (DE3) pLysS cells (Merck Chemicals Ltd., Nottingham, England) were transformed with pGEX6P-1-HaloTag vector,<sup>S8</sup> and cultured in LB media containing 50 mg L<sup>-1</sup> Carbenicillin (Nacalai Tesque, Kyoto, Japan) and 34 mg L<sup>-1</sup> chloramphenicol (Nacalai Tesque). After induction for 16 h at 30 °C, the cells were collected by centrifugation at 4,500 g for 20 min, and frozen in liquid N<sub>2</sub>. After thawing, the cells were suspended in cell lysis buffer containing 20 mM HEPES-KOH (pH 8.0), 200 mM NaCl, 2 mM tris(2-carboxyethyl)phosphine hydrochloride (Nacalai Tesque), 10% glycerol (Nacalai Tesque), and 1% Triton X-100, and then lysozyme (TCEP; Nacalai Tesque) was added to the cell lysate, which were incubated on ice for 30 min. MgCl<sub>2</sub> (final concentration at 10 mM) and DNase I (final concentration of approximately 20 µg mL<sup>-1</sup>) were added into the cell lysate, and incubation was continued for 1 h at 4 °C. Cell debris and larger particles were removed by centrifugation at 8,000 g for 20 min at 4 °C, and the supernatant was then filtered through a 0.45-µm filter. The filtrated supernatants were frozen in liquid N<sub>2</sub>, and stored at -80 °C until use for the following labeling experiments.

### *Chemical modification of GST-HaloTag*

Into five hundred microlitter of the filtrated supernatants in a 1.5 mL-tube, five microlitter of the indicated compounds (10 mM stock in DMSO) were added, and immediately mix by vortex for 10 sec to be the final concentration of 100 µM. The solvent DMSO was used as a negative control. The mixtures were rotated gently in a dark room at room temperature for 16 h. Twenty-five microlitter of this reacted mixtures was diluted with equal volume of 2× SDS sample loading buffer (0.12 M Tris-HCl, pH 6.8, containing 3.4% SDS, 10% glycerol, and 20 mM DTT; Nacalai Tesque), heated at 98 °C for 10 min.

### *SDS-polyacrylamide gel electrophoresis (SDS-PAGE)*

SDS-PAGE analysis was carried out under reducing conditions using a 5–20% polyacrylamide gel (ATTO, Tokyo, Japan). The gels were directly visualized by laser-scanning in a fluorescence imaging analyzer Typhoon 9410 (GE Healthcare). The gels were also stained with Coomassie brilliant blue (CBB) rapid stain kit (Nacalai Tesque).

The separated proteins in the gels were electrically transferred onto PVDF membranes in Mini Trans-Blot Cell (Bio-Rad Laboratories, Inc.). The membranes were immersed in Blocking One solution (Nacalai Tesque), and then incubated with horseradish peroxidase-conjugated streptavidin (HRP-streptavidin) (Kirkegaard & Perry Laboratories, Inc., Meryland, USA) diluted in 1% Blocking One /Tris-based saline containing 0.1% Tween 20 (TBST) at 4 °C for 16 h. The membranes were extensively washed with TBST, and then reacted with ImmunoStar Zeta (FUJIFILM Wako Pure Chemical Corporation, Osaka, Japan). Luminescence signals were imaged on Amersham Imager 600 (GE Healthcare).



### Chemical modification of the HaloTag protein by 27

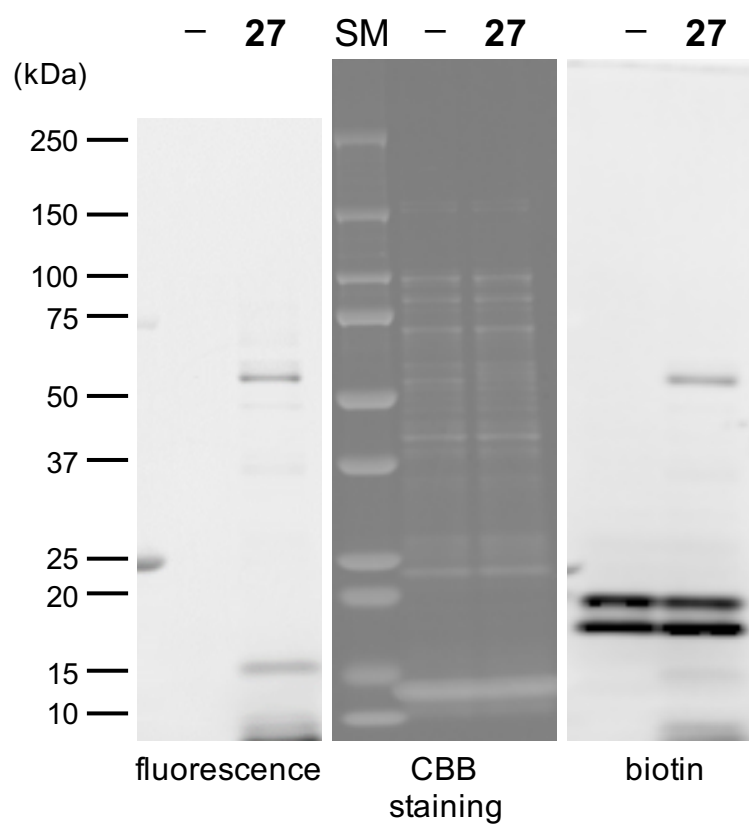

## Characterization Data of New Compounds

1-(1-Adamantyl)-4-phenyl-1*H*-1,2,3-triazole (**10a**),<sup>S9</sup> 1-(1-adamantyl)-4-(1-hydroxy-1-methylethyl)-1*H*-1,2,3-triazole (**10b**),<sup>S10</sup> and 1-(1-adamantyl)-4-(ethoxycarbonyl)-1*H*-1,2,3-triazole (**10c**)<sup>S11</sup> were identical in spectra data with those reported in the literature.

1-(1-Adamantyl)-4-ethoxy-1*H*-1,2,3-triazole (**10d**)

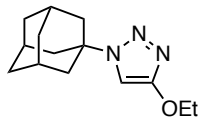

Colorless solid; Mp 136–138 °C; TLC  $R_f$  0.37 (*n*-hexane/EtOAc = 4/1); <sup>1</sup>H NMR (CDCl<sub>3</sub>, 500 MHz) δ 1.40 (t, 3H, *J* = 7.0 Hz), 1.75–1.81 (m, 6H), 2.20–2.25 (m, 9H), 4.27 (q, 2H, *J* = 7.0 Hz), 7.04 (s, 1H); <sup>13</sup>C NMR (CDCl<sub>3</sub>, 126 MHz) δ 14.9 (1C), 29.4 (3C), 35.9 (3C), 42.7 (3C), 59.6 (1C), 66.0 (1C), 102.5 (1C), 160.3 (1C); IR (KBr, cm<sup>-1</sup>) 1182, 1215, 1369, 1452, 1560, 2914, 3127; HRMS (ESI<sup>+</sup>) *m/z* 270.1576 ([M+Na]<sup>+</sup>, C<sub>14</sub>H<sub>21</sub>N<sub>3</sub>NaO<sup>+</sup> requires 270.1577).

3-Azido-*N*-(4-azidobenzyl)-1-adamantanamide (**13**)

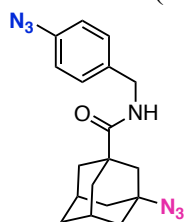

Colorless solid; Mp 83–85 °C; TLC  $R_f$  0.51 (*n*-hexane/EtOAc = 1/1); <sup>1</sup>H NMR (CDCl<sub>3</sub>, 500 MHz) δ 1.63–1.67 (m, 2H), 1.76–1.82 (m, 8H), 1.88–1.92 (m, 2H), 2.29–2.33 (m, 2H), 4.40 (d, 2H, *J* = 6.0 Hz), 5.88 (br, 1H), 6.98–7.01 (m, 2H), 7.23–7.27 (m, 2H); <sup>13</sup>C NMR (CDCl<sub>3</sub>, 126 MHz) δ 29.5 (2C), 34.8 (1C), 38.0 (2C), 40.5 (2C), 42.9 (1C), 43.1 (1C+1C, two signals overlapped), 58.9 (1C), 119.3 (2C), 129.1 (2C), 135.1 (1C), 139.3 (1C), 175.8 (1C); IR (KBr, cm<sup>-1</sup>) 1287, 1506, 1638, 2089, 2922, 3333; HRMS (ESI<sup>+</sup>) *m/z* 374.1700 ([M+Na]<sup>+</sup>, C<sub>18</sub>H<sub>21</sub>N<sub>7</sub>NaO<sup>+</sup> requires 374.1700).

*N*-(4-(4-Acetyl-5-methyl-1*H*-1,2,3-triazole-1-yl)benzyl)-3-azido-1-adamantanamide (**S3**)

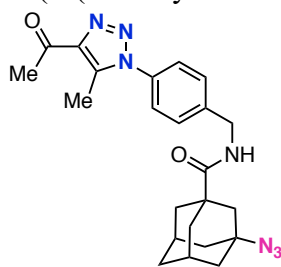

Colorless oil; TLC  $R_f$  0.23 (*n*-hexane/EtOAc = 1/1); <sup>1</sup>H NMR (CDCl<sub>3</sub>, 500 MHz) δ 1.65–1.69 (m, 2H), 1.78–1.86 (m, 8H), 1.92–1.96 (m, 2H), 2.32–2.36 (m, 2H), 2.59 (s, 3H), 2.76 (s, 3H), 4.55 (d, 2H, *J* = 5.5 Hz), 6.03 (br, 1H), 7.41–7.44 (m, 2H), 7.45–7.48 (m, 2H); <sup>13</sup>C NMR (CDCl<sub>3</sub>, 126 MHz) δ 10.2 (1C), 27.9 (1C), 29.5 (2C), 34.8 (1C), 38.0 (2C), 40.5 (2C), 42.8 (1C), 43.2 (1C+1C, two signals overlapped), 58.9 (1C), 125.5 (2C), 128.7 (2C), 134.5 (1C), 137.4 (1C), 140.8 (1C), 143.7 (1C), 176.1 (1C), 194.4 (1C); IR (KBr, cm<sup>-1</sup>) 1244, 1517, 1643, 1681, 2089, 2920, 3342; HRMS (ESI<sup>+</sup>) *m/z* 434.2284 ([M+H]<sup>+</sup>, C<sub>23</sub>H<sub>28</sub>N<sub>7</sub>O<sub>2</sub><sup>+</sup> requires 434.2299).

*N*-(4-(4-Acetyl-5-methyl-1*H*-1,2,3-triazole-1-yl)benzyl)-3-(4-phenyl-1*H*-1,2,3-triazol-1-yl)-1-adamantanamide (**15a**)

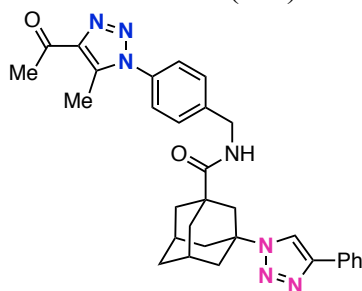

Colorless solid; Mp 179–181 °C; TLC  $R_f$  0.66 (CH<sub>2</sub>Cl<sub>2</sub>/MeOH = 10/1); <sup>1</sup>H NMR (CDCl<sub>3</sub>, 500 MHz) δ 1.77–1.84 (m, 2H), 1.98–2.02 (m, 4H), 2.27–2.31 (m, 4H), 2.43–2.47 (m, 4H), 2.58 (s, 3H), 2.75 (s, 3H), 4.55 (d, 2H,  $J$  = 6.0 Hz), 6.36 (t, 1H,  $J$  = 6.0 Hz), 7.31–7.34 (m, 1H), 7.38–7.46 (m, 6H), 7.78–7.81 (m, 2H), 7.84 (s, 1H); <sup>13</sup>C NMR (CDCl<sub>3</sub>, 126 MHz) δ 10.1 (1C), 27.9 (1C), 29.3 (2C), 34.9 (1C), 38.0 (2C), 42.0 (2C), 42.8 (1C), 42.9 (1C), 44.3 (1C), 59.8 (1C), 116.2 (1C), 125.5 (2C), 125.6 (2C), 128.1 (1C), 128.7 (2C), 128.8 (2C), 130.7 (1C), 134.4 (1C), 137.4 (1C), 140.8 (1C), 143.7 (1C), 147.0 (1C), 175.9 (1C), 194.4 (1C); IR (KBr, cm<sup>-1</sup>) 1287, 1422, 1548, 1651, 1674, 2933, 3116, 3252; HRMS (ESI<sup>+</sup>)  $m/z$  558.2590 ([M+Na]<sup>+</sup>, C<sub>31</sub>H<sub>33</sub>N<sub>7</sub>NaO<sub>2</sub><sup>+</sup> requires 558.2588).

3-Azido-*N*-(4-(4-phenyl-1*H*-1,2,3-triazole-1-yl)benzyl)-1-adamantanamide (**S4**)

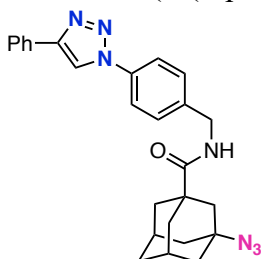

Colorless solid; Mp 211–214 °C; TLC  $R_f$  0.51 (*n*-hexane/EtOAc = 1/1); <sup>1</sup>H NMR (CDCl<sub>3</sub>, 500 MHz) δ 1.64–1.68 (m, 2H), 1.77–1.86 (m, 8H), 1.92–1.96 (m, 2H), 2.30–2.34 (m, 2H), 4.52 (d, 2H,  $J$  = 5.5 Hz), 5.99 (br s, 1H), 7.36–7.40 (m, 1H), 7.41–7.49 (m, 4H), 7.72–7.73 (m, 2H), 7.88–7.91 (m, 2H), 8.18 (s, 1H); <sup>13</sup>C NMR (CDCl<sub>3</sub>, 126 MHz) δ 29.5 (2C), 34.8 (1C), 38.0 (2C), 40.5 (2C), 42.8 (1C), 43.2 (1C+1C, two signals overlapped), 58.9 (1C), 117.6 (1C), 120.7 (2C), 125.8 (2C), 128.5 (1C), 128.8 (2C), 128.9 (2C), 130.1 (1C), 136.2 (1C), 139.4 (1C), 148.3 (1C), 176.1 (1C); IR (KBr, cm<sup>-1</sup>) 1240, 1450, 1523, 1626, 2085, 2916, 3306; HRMS (ESI<sup>+</sup>)  $m/z$  476.2165 ([M+Na]<sup>+</sup>, C<sub>26</sub>H<sub>27</sub>N<sub>7</sub>NaO<sup>+</sup> requires 476.2169).

3-(4-(1-Hydroxy-1-methylethyl)-1*H*-1,2,3-triazol-1-yl)-*N*-(4-(4-phenyl-1*H*-1,2,3-triazole-1-yl)benzyl)-1-adamantanamide (**15b**)

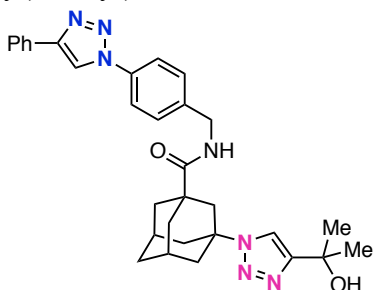

Colorless solid; Mp 133–136 °C; TLC  $R_f$  0.51 (CH<sub>2</sub>Cl<sub>2</sub>/MeOH = 10/1); <sup>1</sup>H NMR (CDCl<sub>3</sub>, 500 MHz) δ 1.62 (s, 6H), 1.76–1.80 (m, 2H), 1.96–2.00 (m, 4H), 2.20–2.24 (m, 4H), 2.35–2.39 (m, 2H), 2.40–2.44 (m, 2H), 4.50 (d, 2H,  $J$  = 5.0 Hz), 6.36 (br, 1H), 7.36–7.40 (m, 3H), 7.44–7.47 (m, 2H), 7.54 (s, 1H), 7.69–7.73 (m, 2H), 7.88–7.91 (m, 2H), 8.19 (s, 1H); <sup>13</sup>C NMR (CDCl<sub>3</sub>, 126 MHz) δ 29.2 (2C), 30.4 (2C), 34.8 (1C), 37.9 (2C), 41.9 (2C), 42.8 (1C), 42.9 (1C), 44.3 (1C), 60.0 (1C), 68.5 (1C),

115.7 (1C), 117.7 (1C), 120.7 (2C), 125.8 (2C), 128.5 (1C), 128.8 (2C), 128.9 (2C), 130.1 (1C), 136.1 (1C), 139.5 (1C), 148.4 (1C), 154.8 (1C), 176.0 (1C); IR (KBr,  $\text{cm}^{-1}$ ) 1228, 1521, 1628, 2922, 3142, 3335; HRMS (ESI<sup>+</sup>)  $m/z$  560.2729 ([M+Na]<sup>+</sup>, C<sub>31</sub>H<sub>35</sub>N<sub>7</sub>NaO<sub>2</sub><sup>+</sup> requires 560.2744).

#### Methyl 3-(4-(azidomethyl)phenyl)-5-bromobenzoate (S7)

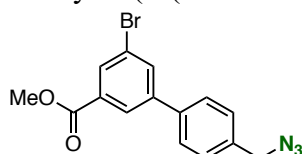

Colorless solid; Mp 71–72 °C; TLC R<sub>f</sub> 0.37 (*n*-hexane/EtOAc = 9/1); <sup>1</sup>H NMR (CDCl<sub>3</sub>, 500 MHz)  $\delta$  3.96 (s, 3H), 4.41 (s, 2H), 7.41–7.44 (m, 2H), 7.60–7.63 (m, 2H), 7.91 (dd, 1H,  $J$  = 1.8, 1.8 Hz), 8.16 (dd, 1H,  $J$  = 1.8, 1.8 Hz), 8.19 (dd, 1H,  $J$  = 1.8, 1.8 Hz); <sup>13</sup>C NMR (CDCl<sub>3</sub>, 126 MHz)  $\delta$  52.5 (1C), 54.4 (1C), 122.9 (1C), 126.7 (1C), 127.6 (2C), 128.9 (2C), 131.3 (1C), 132.4 (1C), 134.2 (1C), 135.6 (1C), 138.7 (1C), 142.7 (1C), 165.7 (1C); IR (KBr,  $\text{cm}^{-1}$ ) 1250, 1305, 1443, 1560, 1720, 2102, 2951; HRMS (ESI<sup>+</sup>)  $m/z$  368.0007 ([M+Na]<sup>+</sup>, C<sub>15</sub>H<sub>12</sub><sup>79</sup>BrN<sub>3</sub>NaO<sub>2</sub><sup>+</sup> requires 368.0005).

#### Methyl 3-(4-azido-3,5-diisopropylphenyl)-5-(4-(azidomethyl)phenyl)benzoate (S9)

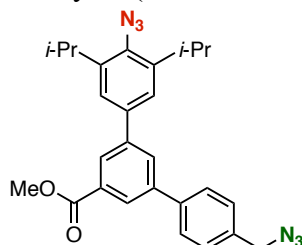

Pale yellow oil; TLC R<sub>f</sub> 0.33 (*n*-hexane/EtOAc = 9/1); <sup>1</sup>H NMR (CDCl<sub>3</sub>, 500 MHz)  $\delta$  1.34 (d, 12H,  $J$  = 6.9 Hz), 3.41–3.47 (m, 2H), 3.99 (s, 3H), 4.42 (s, 2H), 7.37 (s, 2H), 7.43–7.47 (m, 2H), 7.68–7.71 (m, 2H), 7.91 (dd, 1H,  $J$  = 1.5, 1.5 Hz), 8.20 (dd, 1H,  $J$  = 1.5, 1.5 Hz), 8.24 (dd, 1H,  $J$  = 1.5, 1.5 Hz); <sup>13</sup>C NMR (CDCl<sub>3</sub>, 126 MHz)  $\delta$  23.6 (4C), 29.0 (2C), 52.4 (1C), 54.5 (1C), 123.0 (2C), 127.1 (1C), 127.3 (1C), 127.8 (2C), 128.8 (2C), 130.3 (1C), 131.3 (1C), 135.1 (1C), 135.2 (1C), 138.7 (1C), 140.2 (1C), 141.5 (1C), 142.3 (1C), 143.8 (2C), 166.9 (1C); IR (KBr,  $\text{cm}^{-1}$ ) 1242, 1328, 1436, 1597, 1724, 2100, 2962; HRMS (ESI<sup>+</sup>)  $m/z$  491.2161 ([M+Na]<sup>+</sup>, C<sub>27</sub>H<sub>28</sub>N<sub>6</sub>NaO<sub>2</sub><sup>+</sup> requires 491.2166).

#### 3-(4-Azido-3,5-diisopropylphenyl)-5-(4-(azidomethyl)phenyl)benzyl alcohol (S10)

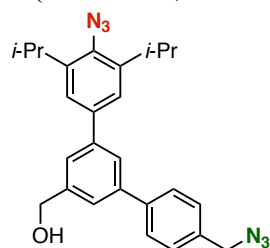

Pale orange oil; TLC R<sub>f</sub> 0.19 (*n*-hexane/EtOAc = 4/1); <sup>1</sup>H NMR (CDCl<sub>3</sub>, 500 MHz)  $\delta$  1.33 (d, 12H,  $J$  = 6.9 Hz), 1.80 (t, 1H,  $J$  = 5.7 Hz), 3.39–3.46 (m, 2H), 4.41 (s, 2H), 4.85 (d, 2H,  $J$  = 5.7 Hz), 7.37 (s, 2H), 7.41–7.45 (m, 2H), 7.54 (s, 1H), 7.58 (s, 1H), 7.64–7.68 (m, 3H); <sup>13</sup>C NMR (CDCl<sub>3</sub>, 126 MHz)  $\delta$  23.6 (4C), 29.0 (2C), 54.5 (1C), 65.3 (1C), 123.0 (2C), 124.8 (1C), 125.0 (1C), 125.4 (1C), 127.8 (2C), 128.8 (2C), 134.7 (1C), 134.9 (1C), 139.4 (1C), 141.0 (1C), 141.5 (1C), 142.0 (1C), 142.3 (1C), 143.6 (2C); IR (KBr,  $\text{cm}^{-1}$ ) 1259, 1327, 1438, 1597, 2100, 2962, 3327; HRMS (ESI<sup>+</sup>)  $m/z$  463.2211 ([M+Na]<sup>+</sup>, C<sub>26</sub>H<sub>28</sub>N<sub>6</sub>NaO<sup>+</sup> requires 463.2217).

*N*-(3-(4-Azido-3,5-diisopropylphenyl)-5-(4-(azidomethyl)phenyl)benzyl)phthalimide (**S11**)

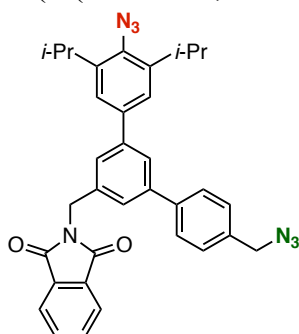

Pale orange oil; TLC  $R_f$  0.40 (*n*-hexane/EtOAc = 4/1);  $^1\text{H}$  NMR ( $\text{CDCl}_3$ , 500 MHz)  $\delta$  1.32 (d, 12H,  $J = 6.8$  Hz), 3.37–3.44 (m, 2H), 4.39 (s, 2H), 4.98 (s, 2H), 7.32 (s, 2H), 7.39–7.42 (m, 2H), 7.59–7.65 (m, 5H), 7.69–7.73 (m, 2H), 7.84–7.88 (m, 2H);  $^{13}\text{C}$  NMR ( $\text{CDCl}_3$ , 126 MHz)  $\delta$  23.5 (4C), 29.0 (2C), 41.6 (1C), 54.5 (1C), 123.1 (2C), 123.4 (2C), 125.7 (1C), 126.4 (1C), 126.8 (1C), 127.8 (2C), 128.7 (2C), 132.1 (2C), 134.1 (2C), 134.7 (1C), 134.9 (1C), 137.5 (1C), 139.3 (1C), 140.8 (1C), 141.7 (1C), 142.5 (1C), 143.5 (2C), 168.1 (2C); IR (KBr,  $\text{cm}^{-1}$ ) 1260, 1340, 1597, 1716, 1770, 2102, 2965; HRMS ( $\text{ESI}^+$ )  $m/z$  592.2425 ( $[\text{M}+\text{Na}]^+$ ,  $\text{C}_{34}\text{H}_{31}\text{N}_7\text{NaO}_2^+$  requires 592.2431).

3-Azido-*N*-(3-(4-azido-3,5-diisopropylphenyl)-5-(4-(azidomethyl)phenyl)benzyl)-1-adamantanamide (**16**)

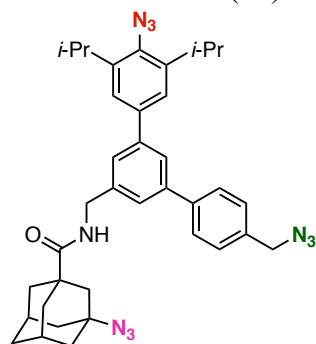

Pale brown solid; Mp 150 °C (decomp.); TLC  $R_f$  0.37 (*n*-hexane/EtOAc = 7/3);  $^1\text{H}$  NMR ( $\text{CDCl}_3$ , 500 MHz)  $\delta$  1.33 (d, 12H,  $J = 6.9$  Hz), 1.64–1.68 (m, 2H), 1.77–1.83 (m, 4H), 1.84–1.88 (m, 4H), 1.93–1.97 (m, 2H), 2.30–2.34 (m, 2H), 3.39–3.47 (m, 2H), 4.41 (s, 2H), 4.59 (d, 2H,  $J = 5.6$  Hz), 5.97 (t, 1H,  $J = 5.6$  Hz), 7.34 (s, 2H), 7.37–7.41 (m, 1H), 7.42–7.46 (m, 3H), 7.62–7.66 (m, 3H);  $^{13}\text{C}$  NMR ( $\text{CDCl}_3$ , 126 MHz)  $\delta$  23.6 (4C), 28.9 (2C), 29.5 (2C), 34.8 (1C), 38.1 (2C), 40.5 (2C), 43.15 (1C), 43.19 (1C), 43.4 (1C), 54.5 (1C), 58.9 (1C), 123.0 (2C), 125.3 (1C), 125.4 (1C), 125.5 (1C), 127.7 (2C), 128.9 (2C), 134.8 (1C), 135.0 (1C), 139.2 (1C), 139.5 (1C), 140.8 (1C), 141.8 (1C), 142.5 (1C), 143.6 (2C), 175.9 (1C); IR (KBr,  $\text{cm}^{-1}$ ) 1257, 1327, 1438, 1535, 1637, 2090, 2926, 3327; HRMS ( $\text{ESI}^+$ )  $m/z$  665.3446 ( $[\text{M}+\text{Na}]^+$ ,  $\text{C}_{37}\text{H}_{42}\text{N}_{10}\text{NaO}^+$  requires 665.3435).

3-Azido-*N*-(3-(4-azido-3,5-diisopropylphenyl)-5-(4-((5-phenyl-1*H*-1,2,3-triazol-1-yl)methyl)phenyl)benzyl)-1-adamantanamide (**S12**)

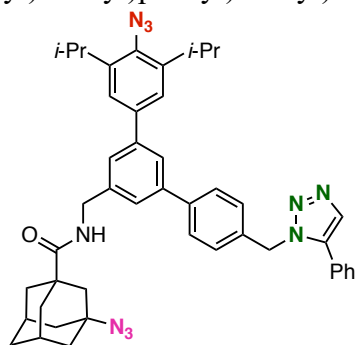

Brown solid; Mp 96 °C (decomp.); TLC  $R_f$  0.47 ( $\text{CH}_2\text{Cl}_2/\text{MeOH} = 30/1$ );  $^1\text{H}$  NMR ( $\text{CDCl}_3$ , 500 MHz)  $\delta$  1.32 (d, 12H,  $J = 6.5$  Hz), 1.62–1.67 (m, 2H), 1.75–1.84 (m, 4H), 1.84–1.89 (m, 4H), 1.92–1.97 (m, 2H), 2.29–2.34 (m, 2H), 3.38–3.45 (m, 2H), 4.57 (d, 2H,  $J = 5.6$  Hz), 5.60 (s, 2H), 5.98–6.02 (br, 1H), 7.18–7.22 (m, 2H), 7.29–7.33 (m, 4H), 7.38 (s, 1H), 7.40 (s, 1H), 7.43–7.47 (m, 3H), 7.52–7.56 (m, 2H), 7.59 (s, 1H), 7.77 (s, 1H);  $^{13}\text{C}$  NMR ( $\text{CDCl}_3$ , 126 MHz)  $\delta$  23.6 (4C), 28.9 (2C), 29.5 (2C), 34.8 (1C), 38.1 (2C), 40.5 (2C), 43.1 (1C), 43.2 (1C), 43.4 (1C), 51.5 (1C), 58.9 (1C), 122.9 (2C), 125.2 (1C), 125.4 (1C), 125.5 (1C), 126.9 (1C), 127.7 (2C), 127.8 (2C), 128.9 (2C), 129.0 (2C), 129.6 (1C), 133.3 (1C), 134.9 (1C), 135.0 (1C), 138.2 (1C), 139.2 (1C), 139.5 (1C), 140.7 (1C), 141.6 (1C), 142.5 (1C), 143.6 (2C), 175.9 (1C); IR (KBr,  $\text{cm}^{-1}$ ) 1246, 1439, 1517, 1643, 2089, 2926, 3323; HRMS (ESI $^+$ )  $m/z$  767.3903 ( $[\text{M}+\text{Na}]^+$ ,  $\text{C}_{45}\text{H}_{48}\text{N}_{10}\text{NaO}^+$  requires 767.3905).

3-Azido-*N*-(3-(4-(8,9-dihydro-1*H*-dibenzo[3,4:7,8]cycloocta[1,2-*d*][1,2,3]triazol-1-yl)-3,5-diisopropylphenyl)-5-(4-((5-phenyl-1*H*-1,2,3-triazol-1-yl)methyl)phenyl)benzyl)-1-adamantanamide (**S13**)

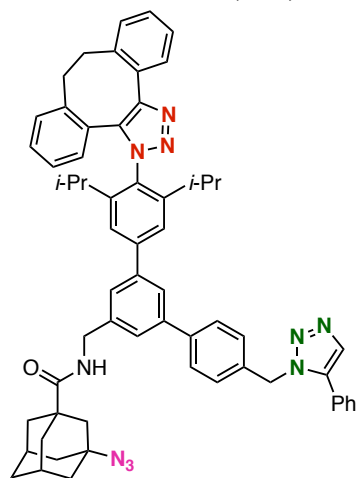

Colorless solid; Mp 132–134 °C; TLC  $R_f$  0.27 ( $\text{CH}_2\text{Cl}_2/\text{MeOH} = 30/1$ );  $^1\text{H}$  NMR ( $\text{CDCl}_3$ , 500 MHz)  $\delta$  1.08–1.42 (br, 12H), 1.62–1.67 (m, 2H), 1.75–1.89 (m, 8H), 1.92–1.97 (m, 2H), 2.28–2.34 (m, 2H), 2.40–2.52 (br, 2H), 3.08–3.28 (br, 2H), 3.32–3.48 (br, 2H), 4.58 (d, 2H,  $J = 5.7$  Hz), 5.60 (s, 2H), 6.08 (br t, 1H,  $J = 5.7$  Hz), 6.75 (d, 1H,  $J = 7.6$  Hz), 6.96 (dd, 1H,  $J = 7.6$  Hz), 7.15–7.29 (m, 7H), 7.29–7.35 (m, 2H), 7.35–7.50 (m, 7H), 7.52–7.59 (m, 2H), 7.62 (s, 1H), 7.66–7.72 (m, 1H), 7.77 (s, 1H);  $^{13}\text{C}$  NMR ( $\text{CDCl}_3$ , 126 MHz)  $\delta$  22.6 (2C), 25.4 (2C), 28.9 (2C), 29.5 (2C), 32.7 (1C), 34.8 (1C), 36.8 (1C), 38.1 (2C), 40.5 (2C), 43.1 (1C), 43.2 (1C), 43.3 (1C), 51.5 (1C), 58.9 (1C), 122.9 (2C), 125.3 (1C), 125.7 (1C), 125.8 (1C), 125.9 (1C), 126.0 (1C), 126.1 (1C), 126.9 (1C), 127.7 (2C), 127.8 (2C), 128.1 (2C), 128.8 (1C), 128.9 (2C), 129.1 (2C), 129.55 (1C), 129.58 (1C), 129.6 (2C), 129.9 (1C), 130.9 (1C), 131.6 (1C), 132.6 (1C), 135.0 (1C), 135.1 (1C), 137.5 (2C), 139.7 (1C), 140.6 (1C), 141.5 (1C), 141.7 (1C), 142.0 (1C), 142.9 (2C), 146.2 (1C), 176.0 (1C); IR (KBr,  $\text{cm}^{-1}$ ) 1244, 1454, 1504, 1643, 2087, 2926, 3335; HRMS (ESI $^+$ )  $m/z$  971.4868 ( $[\text{M}+\text{Na}]^+$ ,  $\text{C}_{61}\text{H}_{60}\text{N}_{10}\text{NaO}^+$  requires 971.4844).

3-(4-((((((1*R*\*,8*S*\*,9*R*\*)-Bicyclo[6.1.0]non-4-yn-9-yl)methyl)oxycarbonylamino)ethoxy)ethoxy)methyl)-1*H*-1,2,3-triazol-1-yl)-*N*-(3-(4-(8,9-dihydro-1*H*-dibenzo[3,4:7,8]cycloocta[1,2-*d*][1,2,3]triazol-1-yl)-3,5-diisopropylphenyl)-5-(4-((5-phenyl-1*H*-1,2,3-triazol-1-yl)methyl)phenyl)benzyl)-1-adamantanamide (**18**)

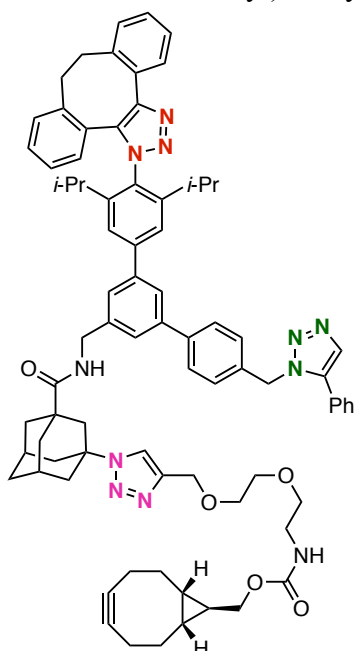

Colorless solid; Mp 105–106 °C; TLC  $R_f$  0.67 ( $\text{CH}_2\text{Cl}_2/\text{MeOH} = 10/1$ ); HPLC analysis:  $R_t = 28.4$  min [column: Shiseido CAPCELL PAK MG II (4.6 mm i.d.  $\times$  250 mm); mobile phase:  $\text{CH}_3\text{CN}:\text{H}_2\text{O} = 40:60$  (0–5 min), linear gradient from 40:60 to 99:1 (5–25 min), 99:1 (25–35 min); flow rate: 1.00 mL/min; detection: UV at 254 nm]; IR (KBr,  $\text{cm}^{-1}$ ) 1278, 1452, 1517, 1720, 2922, 3340; HRMS ( $\text{ESI}^+$ )  $m/z$  1290.6617 ( $[\text{M}+\text{Na}]^+$ ,  $\text{C}_{79}\text{H}_{85}\text{N}_{11}\text{NaO}_5^+$  requires 1266.6627).

HPLC chart:

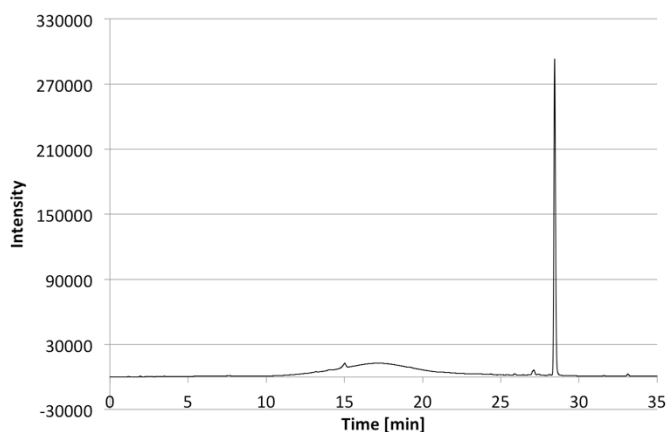

(3-Azido-5-(azidomethyl)phenyl)boronic acid (**S8**)

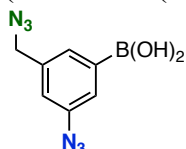

Pale yellow solid; Mp 114–116 °C; TLC  $R_f$  0.45 (*n*-hexane/EtOAc = 1/1);  $^1\text{H}$  NMR ( $\text{CDCl}_3$ , 500 MHz, observed as a mixture of the titled compound and its boroxine)  $\delta$  4.37 (s, 2H for boroxine), 4.48 (s, 2H), 7.07 (s, 1H for boroxine), 7.23 (dd, 1H,  $J = 2.0, 2.0$  Hz), 7.37 (s, 1H for boroxine), 7.43 (s, 1H for boroxine), 7.77 (d, 1H,  $J = 2.0$  Hz), 7.87 (br s, 1H);  $^{13}\text{C}$  NMR ( $\text{CDCl}_3$ , 126 MHz, observed as a mixture of the titled compound and its boroxine)  $\delta$  54.2, 121.2, 122.9, 123.7, 125.6, 129.5, 131.4, 132.0, 137.5, 140.6, 140.8; IR (KBr,  $\text{cm}^{-1}$ ) 1293, 1355, 1428, 2105, 3287; HRMS (ESI $^+$ )  $m/z$  241.0616 ( $[\text{M}+\text{Na}]^+$ ,  $\text{C}_7\text{H}_7\text{BN}_6\text{NaO}_2^+$  requires 241.0616).

Methyl 3-(3-azido-5-(azidomethyl)phenyl)-5-bromobenzoate (**S15**)

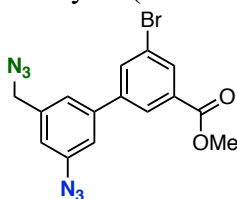

Brown solid; Mp 93–94 °C (decomp.); TLC  $R_f$  0.35 (*n*-hexane/ $\text{CH}_2\text{Cl}_2$  = 2/3);  $^1\text{H}$  NMR ( $\text{CDCl}_3$ , 500 MHz)  $\delta$  3.97 (s, 3H), 4.44 (s, 2H), 7.03 (dd, 1H,  $J = 1.8, 1.8$  Hz), 7.17 (dd, 1H,  $J = 1.8, 1.8$  Hz), 7.28 (dd, 1H,  $J = 1.6, 1.6$  Hz), 7.88 (dd, 1H,  $J = 1.8, 1.8$  Hz), 8.15 (dd, 1H,  $J = 1.6, 1.6$  Hz), 8.19 (dd, 1H,  $J = 1.6, 1.6$  Hz);  $^{13}\text{C}$  NMR ( $\text{CDCl}_3$ , 126 MHz)  $\delta$  52.6 (1C), 54.2 (1C), 117.5 (1C), 118.1 (1C), 123.0 (1C), 123.3 (1C), 126.9 (1C), 131.9 (1C), 132.5 (1C), 134.3 (1C), 138.3 (1C), 141.1 (1C), 141.6 (1C), 141.8 (1C), 165.5 (1C); IR (KBr,  $\text{cm}^{-1}$ ) 768, 855, 1245, 1284, 1327, 1345, 1431, 1569, 1595, 1726, 2110; HRMS (ESI $^+$ )  $m/z$  409.0017 ( $[\text{M}+\text{Na}]^+$ ,  $\text{C}_{15}\text{H}_{11}^{79}\text{BrN}_6\text{NaO}_2^+$  requires 409.0019).

Methyl 3-(3-azido-5-(azidomethyl)phenyl)-5-(4-azido-3,5-diisopropylphenyl)benzoate (**S16**)

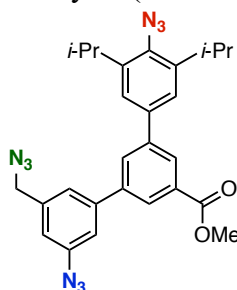

Pale brown solid; Mp 100–102 °C (decomp.); TLC  $R_f$  0.49 (*n*-hexane/ $\text{CH}_2\text{Cl}_2$  = 3/7);  $^1\text{H}$  NMR ( $\text{CDCl}_3$ , 500 MHz)  $\delta$  1.34 (d, 12H,  $J = 6.8$  Hz), 3.43 (sept, 2H,  $J = 6.8$  Hz), 4.00 (s, 3H), 4.45 (s, 2H), 7.04 (dd, 1H,  $J = 1.6, 1.6$  Hz), 7.25 (dd, 1H,  $J = 1.8, 1.8$  Hz), 7.36 (s, 3H), 7.86 (dd, 1H,  $J = 1.8, 1.8$  Hz), 8.20 (dd, 1H,  $J = 1.6, 1.6$  Hz), 8.22 (dd, 1H,  $J = 1.6, 1.6$  Hz);  $^{13}\text{C}$  NMR ( $\text{CDCl}_3$ , 126 MHz)  $\delta$  23.5 (4C), 29.0 (2C), 52.4 (1C), 54.3 (1C), 117.8 (2C), 123.1 (2C), 123.5 (1C), 127.1 (1C), 127.9 (1C), 130.3 (1C), 131.4 (1C), 135.3 (1C), 138.2 (1C), 138.5 (1C), 140.7 (1C), 141.4 (1C), 142.5 (1C), 142.7 (1C), 143.8 (2C), 166.7 (1C); IR (KBr,  $\text{cm}^{-1}$ ) 1243, 1261, 1288, 1308, 1332, 1438, 2110, 2966; HRMS (ESI $^+$ )  $m/z$  532.2180 ( $[\text{M}+\text{Na}]^+$ ,  $\text{C}_{27}\text{H}_{27}\text{N}_9\text{NaO}_2^+$  requires 532.2180).



3-(3-Azido-5-(azidomethyl)phenyl)-5-(4-azido-3,5-diisopropylphenyl)benzyl alcohol (S17)

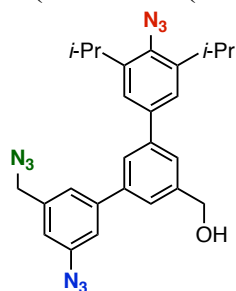

Brown oil; TLC  $R_f$  0.36 (*n*-hexane/EtOAc = 7/3);  $^1\text{H}$  NMR ( $\text{CDCl}_3$ , 500 MHz)  $\delta$  1.34 (d, 12H,  $J = 6.8$  Hz), 1.84 (t, 1H,  $J = 5.6$  Hz), 3.43 (sept, 2H,  $J = 6.8$  Hz), 4.43 (s, 2H), 4.86 (d, 2H,  $J = 4.9$  Hz), 7.00 (dd, 1H,  $J = 1.6, 1.6$  Hz), 7.24 (dd, 1H,  $J = 1.8, 1.8$  Hz), 7.34–7.35 (m, 3H), 7.55–7.56 (m, 2H), 7.61 (dd, 1H,  $J = 1.6, 1.6$  Hz);  $^{13}\text{C}$  NMR ( $\text{CDCl}_3$ , 126 MHz)  $\delta$  23.6 (4C), 29.0 (2C), 54.3 (1C), 65.2 (1C), 117.5 (1C), 117.7 (1C), 123.0 (2C), 123.6 (1C), 124.7 (1C), 125.4 (1C), 125.5 (1C), 135.0 (1C), 138.0 (1C), 139.2 (1C), 140.7 (1C), 141.3 (1C), 142.1 (1C), 142.5 (1C), 143.5 (1C), 143.7 (2C); IR (KBr,  $\text{cm}^{-1}$ ) 853, 1254, 1285, 1309, 1337, 1364, 1392, 1422, 1440, 1462, 1592, 2108, 2872, 2932, 2966, 3319; HRMS (ESI $^+$ )  $m/z$  504.2221 ( $[\text{M}+\text{Na}]^+$ ,  $\text{C}_{26}\text{H}_{27}\text{N}_9\text{NaO}^+$  requires 504.2231).

*N*-(3-(3-Azido-5-(azidomethyl)phenyl)-5-(4-azido-3,5-diisopropylphenyl)benzyl)phthalimide (S18)

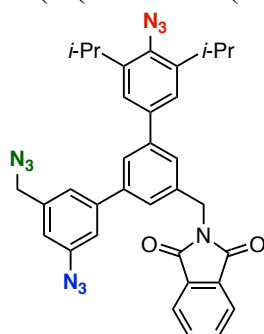

Pale brown solid; Mp 56–58 °C (decomp.); TLC  $R_f$  0.33 (*n*-hexane/EtOAc = 4/1);  $^1\text{H}$  NMR ( $\text{CDCl}_3$ , 500 MHz)  $\delta$  1.32 (d, 12H,  $J = 6.8$  Hz), 3.41 (sept, 2H,  $J = 6.8$  Hz), 4.42 (s, 2H), 4.98 (s, 2H), 7.00 (dd, 1H,  $J = 1.8, 1.8$  Hz), 7.19 (dd, 1H,  $J = 1.8, 1.8$  Hz), 7.29 (br s, 1H), 7.30 (s, 2H), 7.57 (dd, 1H,  $J = 1.6, 1.6$  Hz), 7.59 (dd, 1H,  $J = 1.6, 1.6$  Hz), 7.62 (dd, 1H,  $J = 1.6, 1.6$  Hz), 7.70–7.73 (m, 2H), 7.84–7.88 (m, 2H);  $^{13}\text{C}$  NMR ( $\text{CDCl}_3$ , 126 MHz)  $\delta$  23.5 (4C), 29.0 (2C), 41.6 (1C), 54.3 (1C), 117.4 (1C), 117.9 (1C), 123.1 (2C), 123.4 (2C), 123.6 (1C), 125.7 (1C), 126.5 (1C), 127.4 (1C), 132.1 (2C), 134.1 (2C), 135.0 (1C), 137.6 (1C), 138.0 (1C), 139.1 (1C), 140.9 (1C), 141.2 (1C), 142.7 (1C), 143.3 (1C), 143.6 (2C), 168.0 (2C); IR (KBr,  $\text{cm}^{-1}$ ) 713, 733, 1255, 1285, 1311, 1323, 1342, 1364, 1393, 1428, 1440, 1467, 1592, 1716, 1770, 2109, 2966; HRMS (ESI $^+$ )  $m/z$  633.2447 ( $[\text{M}+\text{Na}]^+$ ,  $\text{C}_{34}\text{H}_{30}\text{N}_{10}\text{NaO}_2^+$  requires 633.2445).

3-(3-Azido-5-(azidomethyl)phenyl)-5-(4-azido-3,5-diisopropylphenyl)benzylamine (S19)

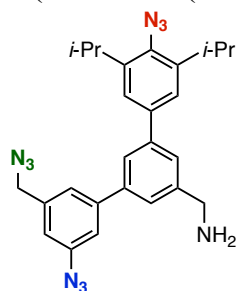

Brown oil; TLC  $R_f$  0.39 ( $\text{CH}_2\text{Cl}_2/\text{MeOH} = 9/1$ );  $^1\text{H}$  NMR ( $\text{CDCl}_3$ , 500 MHz)  $\delta$  1.34 (d, 12H,  $J = 6.8$  Hz), 1.66–1.81 (br, 2H), 3.43 (sept, 2H,  $J = 6.8$  Hz), 4.04 (s, 2H), 4.43 (s, 2H), 7.00 (dd, 1H,  $J = 1.6, 1.6$  Hz), 7.24 (dd, 1H,  $J = 1.8, 1.8$  Hz), 7.34–7.36 (m, 3H), 7.50–7.51 (m, 2H), 7.56 (dd, 1H,  $J = 1.6,$

1.6 Hz);  $^{13}\text{C}$  NMR ( $\text{CDCl}_3$ , 126 MHz)  $\delta$  23.6 (4C), 29.0 (2C), 46.5 (1C), 54.3 (1C), 117.4 (1C), 117.8 (1C), 123.1 (2C), 123.6 (1C), 124.7 (1C), 125.1 (1C), 125.9 (1C), 135.0 (1C), 137.9 (1C), 139.4 (1C), 140.7 (1C), 141.2 (1C), 142.5 (1C), 143.6 (2C), 143.7 (1C), 144.4 (1C); IR (KBr,  $\text{cm}^{-1}$ ) 851, 1254, 1284, 1309, 1333, 1364, 1387, 1421, 1440, 1462, 1591, 2109, 2872, 2929, 2965; HRMS ( $\text{ESI}^+$ )  $m/z$  481.2571 ( $[\text{M}+\text{H}]^+$ ,  $\text{C}_{26}\text{H}_{29}\text{N}_{10}^+$  requires 481.2571).

3-Azido-*N*-(3-(3-azido-5-(azidomethyl)phenyl)-5-(4-azido-3,5-diisopropylphenyl)benzyl)adamantane-1-carboxamide (**19**)

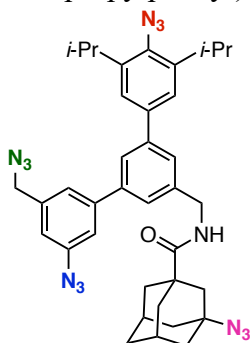

Pale yellow solid; Mp 113–115 °C (decomp.); TLC  $R_f$  0.32 ( $n$ -hexane/EtOAc = 7/3); HPLC analysis:  $R_t$  = 32.4 min [column: Shiseido CAPCELL PAK MG II (4.6 mm i.d.  $\times$  250 mm); mobile phase:  $\text{CH}_3\text{CN}:\text{H}_2\text{O}$  = 40:60 (0–5 min), linear gradient from 40:60 to 99:1 (5–25 min), 99:1 (25–35 min); flow rate: 1.00 mL/min; detection: UV at 254 nm];  $^1\text{H}$  NMR ( $\text{CDCl}_3$ , 500 MHz)  $\delta$  1.33 (d, 12H,  $J$  = 6.8 Hz), 1.63–1.68 (m, 2H), 1.77–1.89 (m, 8H), 1.93–1.97 (m, 2H), 2.31–2.32 (m, 2H) 3.43 (sept, 2H,  $J$  = 6.8 Hz), 4.43 (s, 2H), 4.59 (d, 2H,  $J$  = 5.5 Hz), 6.00 (t, 1H,  $J$  = 5.5 Hz), 7.00 (dd, 1H,  $J$  = 1.6, 1.6 Hz), 7.20 (dd, 1H,  $J$  = 1.8, 1.8 Hz), 7.31–7.32 (m, 3H), 7.40–7.41 (m, 2H), 7.59 (dd, 1H,  $J$  = 1.6, 1.6 Hz);  $^{13}\text{C}$  NMR ( $\text{CDCl}_3$ , 126 MHz)  $\delta$  23.5 (4C), 28.9 (2C), 29.5 (2C), 34.8 (1C), 38.1 (2C), 40.5 (2C), 43.1 (1C), 43.2 (1C), 43.3 (1C), 54.3 (1C), 58.9 (1C), 117.6 (1C), 117.7 (1C), 123.0 (2C), 123.5 (1C), 125.3 (1C), 125.4 (1C), 126.1 (1C), 135.1 (1C), 138.1 (1C), 139.1 (1C), 139.7 (1C), 140.9 (1C), 141.3 (1C), 142.7 (2C), 143.3 (1C), 143.7 (1C), 175.9 (1C); IR (KBr,  $\text{cm}^{-1}$ ) 850, 1252, 1284, 1306, 1338, 1364, 1422, 1441, 1462, 1527, 1593, 1639, 2091, 2109, 2857, 2911, 2928, 2965, 3331; HRMS ( $\text{ESI}^+$ )  $m/z$  706.3450 ( $[\text{M}+\text{Na}]^+$ ,  $\text{C}_{37}\text{H}_{41}\text{N}_{13}\text{NaO}^+$  requires 706.3449).

HPLC chart:

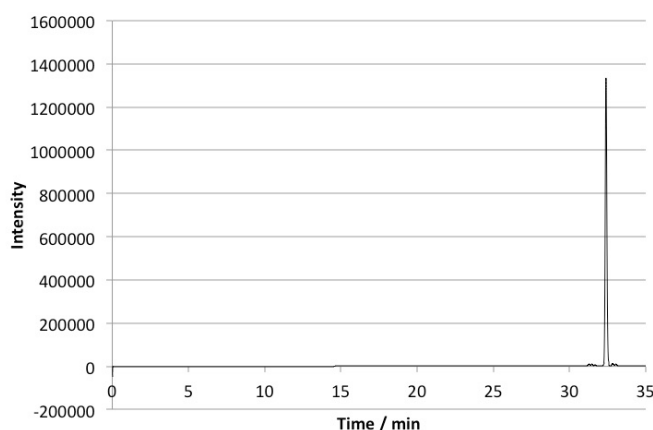

*N*-(3-(3-(4-Acetyl-5-methyl-1*H*-1,2,3-triazol-1-yl)-3-azido-5-(azidomethyl)phenyl)-5-(4-azido-3,5-diisopropylphenyl)benzyl)adamantane-1-carboxamide (**S20**)

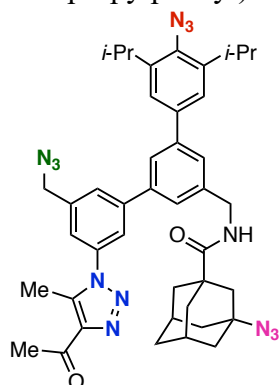

Orange solid; Mp 74–76 °C (decomp.); TLC  $R_f$  0.39 (*n*-hexane/EtOAc = 1/1);  $^1\text{H}$  NMR ( $\text{CDCl}_3$ , 500 MHz)  $\delta$  1.33 (d, 12H,  $J$  = 6.8 Hz), 1.63–1.69 (m, 2H), 1.77–1.90 (m, 8H), 1.91–1.97 (br, 2H), 2.29–2.35 (m, 2H), 2.66 (s, 3H), 2.77 (s, 3H), 3.37–3.47 (m, 2H), 4.57 (s, 2H), 4.60 (d, 2H,  $J$  = 5.8 Hz), 6.03 (t, 1H,  $J$  = 5.8 Hz), 7.31 (s, 2H), 7.43 (br s, 1H), 7.44–7.48 (m, 2H), 7.62 (dd, 1H,  $J$  = 1.5, 1.5 Hz), 7.65 (dd, 1H,  $J$  = 1.5, 1.5 Hz), 7.73 (br s, 1H);  $^{13}\text{C}$  NMR ( $\text{CDCl}_3$ , 126 MHz)  $\delta$  10.3 (1C), 23.6 (4C), 27.9 (1C), 28.9 (2C), 29.5 (2C), 34.8 (1C), 38.1 (2C), 40.5 (2C), 43.17 (1C), 43.21 (1C), 43.24 (1C), 54.0 (1C), 58.9 (1C), 123.0 (2C), 123.5 (1C), 123.9 (1C), 125.3 (1C), 125.5 (1C), 126.5 (1C), 128.2 (1C), 135.2 (1C), 136.3 (1C), 137.5 (1C), 138.3 (1C), 138.9 (1C), 140.0 (2C), 142.9 (1C), 143.5 (1C), 143.7 (2C), 143.8 (1C), 176.0 (1C), 194.3 (1C); IR (KBr,  $\text{cm}^{-1}$ ) 706, 737, 853, 870, 953, 976, 1016, 1074, 1246, 1265, 1281, 1337, 1362, 1385, 1429, 1445, 1483, 1524, 1555, 1595, 1647, 1684, 2091, 2857, 2911, 2928, 2963; HRMS (ESI $^+$ )  $m/z$  788.3870 ( $[\text{M}+\text{Na}]^+$ ,  $\text{C}_{42}\text{H}_{47}\text{N}_{13}\text{NaO}_2^+$  requires 788.3868).

3-Azido-*N*-(3-(3-(4-acetyl-5-methyl-1*H*-1,2,3-triazol-1-yl)-5-((5-(2-hydroxypropan-2-yl)-1*H*-1,2,3-triazol-1-yl)methyl)phenyl)-5-(4-azido-3,5-diisopropylphenyl)benzyl)adamantane-1-carboxamide (**S21**)

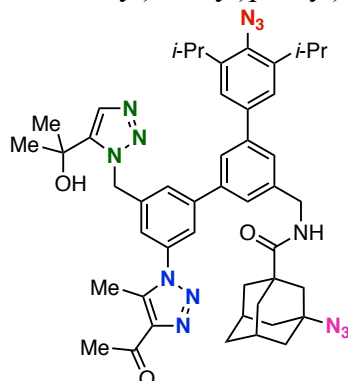

Brown solid; Mp 84–86 °C (decomp.); TLC  $R_f$  0.35 (*n*-hexane/EtOAc = 1/4);  $^1\text{H}$  NMR ( $\text{CDCl}_3$ , 500 MHz)  $\delta$  1.32 (d, 12H,  $J$  = 6.9 Hz), 1.61–1.67 (m, 8H), 1.75–1.85 (m, 8H), 1.91–1.95 (m, 2H), 2.28–2.34 (m, 2H), 2.56 (s, 3H), 2.71 (s, 3H), 3.21 (br s, 1H), 3.37–3.47 (m, 2H), 4.53 (d, 2H,  $J$  = 5.8 Hz), 5.96 (s, 2H), 6.21 (t, 1H,  $J$  = 5.8 Hz), 7.30 (s, 2H), 7.31 (br s, 1H), 7.41 (br s, 2H), 7.43 (s, 1H), 7.57 (br s, 1H), 7.59 (dd, 1H,  $J$  = 1.6, 1.6 Hz), 7.76 (br s, 1H);  $^{13}\text{C}$  NMR ( $\text{CDCl}_3$ , 126 MHz)  $\delta$  10.2 (1C), 23.5 (4C), 27.9 (1C), 28.9 (2C), 29.5 (2C), 30.9 (2C), 34.8 (1C), 38.0 (2C), 40.5 (2C), 43.1 (1C), 43.19 (1C), 43.23 (1C), 52.1 (1C), 58.9 (1C), 67.9 (1C), 122.9 (2C), 123.4 (1C), 123.5 (1C), 125.1 (1C), 125.7 (1C), 126.4 (1C), 128.4 (1C), 130.8 (1C), 135.2 (1C), 136.0 (1C), 137.5 (1C), 138.9 (1C), 139.0 (1C), 139.9 (1C), 140.0 (1C), 142.8 (1C), 143.1 (1C), 143.2 (1C), 143.6 (1C), 143.7 (2C), 176.2 (1C), 194.2 (1C); IR (KBr,  $\text{cm}^{-1}$ ) 696, 706, 741, 854, 872, 955, 984, 1125, 1175, 1244, 1265, 1285, 1364, 1429, 1445, 1483, 1528, 1555, 1595, 1639, 1684, 2089, 2116, 2859, 2911, 2932, 2965, 3354; HRMS (ESI $^+$ )  $m/z$  872.4415 ( $[\text{M}+\text{Na}]^+$ ,  $\text{C}_{47}\text{H}_{55}\text{N}_{13}\text{NaO}_3^+$  requires 872.4443).

3-Azido-*N*-(3-(3-(4-acetyl-5-methyl-1*H*-1,2,3-triazol-1-yl)-5-((5-(2-hydroxypropan-2-yl)-1*H*-1,2,3-triazol-1-yl)methyl)phenyl)-5-(4-(8,9-dihydro-1-*H*-dibenzo[3,4:7,8]cycloocta[1,2-*d*][1,2,3]triazol-1-yl)-3,5-diisopropylphenyl)benzyl)adamantane-1-carboxamide (**S22**)

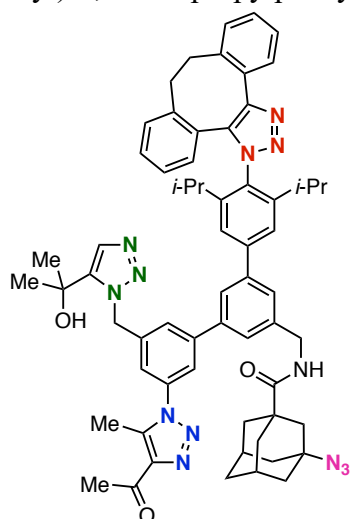

Colorless solid; Mp 151 °C (decomp.); TLC  $R_f$  0.32 (*n*-hexane/EtOAc = 1/4);  $^1\text{H}$  NMR ( $\text{CDCl}_3$ , 500 MHz)  $\delta$  1.10–1.40 (br, 12H), 1.61–1.67 (m, 8H), 1.76–1.86 (m, 8H), 1.92–1.96 (m, 2H), 2.28–2.34 (m, 2H), 2.41–2.49 (br, 2H), 2.57 (s, 3H), 2.72 (s, 3H), 3.09–3.24 (br, 2H), 3.25 (br s, 1H), 3.31–3.46 (br, 2H), 4.55 (d, 2H,  $J = 5.5$  Hz), 5.96 (s, 2H), 6.31 (t, 1H,  $J = 5.5$  Hz), 6.76 (d, 1H,  $J = 7.5$  Hz), 6.98 (dd, 1H,  $J = 7.5, 7.5$  Hz), 7.20–7.28 (m, 4H), 7.30–7.34 (m, 2H), 7.35–7.40 (br, 2H), 7.44 (s, 1H), 7.46 (br s, 2H), 7.59–7.62 (m, 2H), 7.66–7.70 (m, 1H), 7.77 (br s, 1H);  $^{13}\text{C}$  NMR ( $\text{CDCl}_3$ , 126 MHz)  $\delta$  10.2 (1C), 22.6 (2C), 25.4 (2C), 27.9 (1C), 28.9 (1C), 29.2 (1C), 29.5 (2C), 30.9 (2C), 32.7 (1C), 34.8 (1C), 36.8 (1C), 38.0 (2C), 40.5 (2C), 43.0 (1C), 43.1 (1C), 43.2 (1C), 52.1 (1C), 58.9 (1C), 67.9 (1C), 122.9 (2C), 123.5 (2C), 125.2 (1C), 125.8 (1C), 126.0 (1C), 126.1 (2C), 126.5 (1C), 128.1 (1C), 128.5 (1C), 128.8 (2C), 129.5 (1C), 129.6 (1C), 129.9 (1C), 130.8 (1C), 130.9 (1C), 131.7 (1C), 132.5 (1C), 135.1 (1C), 136.0 (1C), 137.4 (1C), 137.5 (1C), 139.0 (1C), 140.0 (1C), 140.2 (1C), 141.4 (1C), 142.2 (1C), 142.6 (1C), 143.0 (1C), 143.2 (1C), 143.7 (2C), 146.2 (1C), 176.3 (1C), 194.2 (1C); IR (KBr,  $\text{cm}^{-1}$ ) 1240, 1365, 1450, 1595, 1681, 2089, 2928, 3347; HRMS (ESI $^+$ )  $m/z$  1076.5381 ( $[\text{M}+\text{Na}]^+$ ,  $\text{C}_{63}\text{H}_{67}\text{N}_{13}\text{NaO}_3^+$  requires 1076.5382).

3-(4-(4-Methylphenyl)-1*H*-1,2,3-triazol-1-yl)-*N*-(3-(3-(4-acetyl-5-methyl-1*H*-1,2,3-triazol-1-yl)-5-((5-(2-hydroxypropan-2-yl)-1*H*-1,2,3-triazol-1-yl)methyl)phenyl)-5-(4-(8,9-dihydro-1-*H*-dibenzo[3,4:7,8]cycloocta[1,2-*d*][1,2,3]triazol-1-yl)-3,5-diisopropylphenyl)benzyl)adamantane-1-carboxamide (**21**)

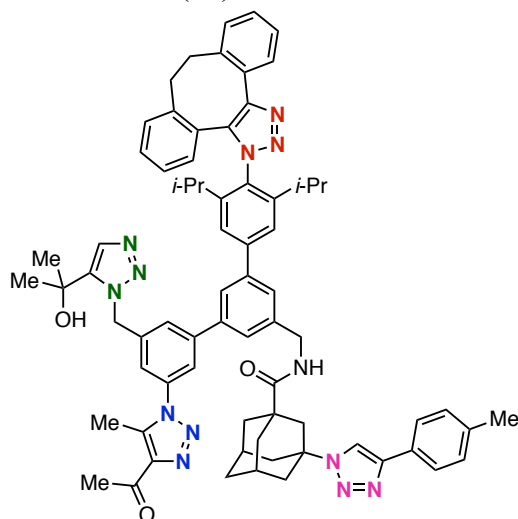

Colorless solid; Mp 173 °C (decomp.); TLC  $R_f$  0.17 (*n*-hexane/EtOAc = 1/9);  $^1\text{H}$  NMR ( $\text{CDCl}_3$ , 500 MHz)  $\delta$  1.10–1.40 (br, 12H), 1.62 (s, 6H), 1.72–1.78 (m, 2H), 1.90–2.00 (m, 4H), 2.12–2.24 (m, 4H), 2.27–2.33 (m, 2H), 2.34 (s, 3H), 2.35–2.40 (br, 2H), 2.41–2.49 (br, 2H), 2.50 (s, 3H), 2.72 (s, 3H), 3.09–3.23 (br, 2H), 3.32–3.46 (br, 2H), 4.10–4.30 (br, 1H), 4.51 (d, 2H,  $J = 5.3$  Hz), 5.94 (s, 2H), 6.74 (d, 1H,  $J = 7.6$  Hz), 6.77–6.87 (br, 1H), 6.96 (dd, 1H,  $J = 7.6, 7.6$  Hz), 7.15–7.33 (m, 8H), 7.34–7.41 (br, 2H), 7.44 (s, 2H), 7.52–7.62 (m, 5H), 7.66–7.71 (m, 1H), 7.74 (s, 1H), 7.75 (br s, 1H);  $^{13}\text{C}$  NMR ( $\text{CDCl}_3$ , 126 MHz)  $\delta$  10.2 (1C), 21.2 (1C), 22.6 (2C), 25.4 (2C), 27.8 (1C), 28.9 (2C), 29.2 (2C), 30.8 (2C), 32.7 (1C), 34.8 (1C), 36.8 (1C), 37.9 (2C), 41.9 (2C), 42.9 (1C), 43.1 (1C), 44.0 (1C), 52.1 (1C), 59.8 (1C), 67.7 (1C), 115.9 (1C), 122.9 (2C), 123.4 (2C), 125.1 (1C), 125.4 (2C), 125.8 (1C), 126.0 (1C), 126.10 (1C), 126.14 (1C), 126.8 (1C), 127.5 (1C), 128.1 (1C), 128.5 (1C), 128.8 (2C), 129.5 (2C), 129.6 (2C), 129.9 (1C), 130.9 (2C), 131.7 (1C), 132.5 (1C), 135.1 (1C), 135.9 (1C), 137.5 (2C), 138.0 (1C), 138.9 (1C), 140.0 (1C), 140.4 (1C), 141.4 (1C), 142.2 (1C), 142.7 (1C), 142.9 (1C), 143.6 (2C), 143.7 (1C), 146.2 (1C), 146.7 (1C), 176.2 (1C), 194.1 (1C); IR (KBr,  $\text{cm}^{-1}$ ) 1278, 1365, 1454, 1595, 1681, 2926, 3341; HRMS (ESI $^+$ )  $m/z$  1192.6005 ( $[\text{M}+\text{Na}]^+$ ,  $\text{C}_{72}\text{H}_{75}\text{N}_{13}\text{NaO}_3^+$  requires 1192.6008).

*N*-(5,11-Bis(((1,3-dihydroxypropan-2-yl)oxy)methyl)-1,15-dihydroxy-2,14-bis(hydroxymethyl)-3,6,10,13-tetraoxapentadecan-8-yl)-4-ethynylbenzamide (**25**)

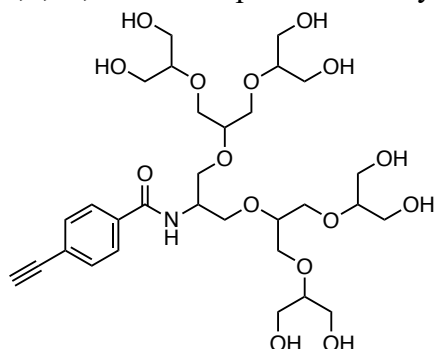

Colorless oil; TLC (reverse phase)  $R_f$  0.29 ( $\text{H}_2\text{O}/\text{MeCN} = 4/1$ );  $^1\text{H}$  NMR ( $\text{CD}_3\text{OD}$ , 500 MHz)  $\delta$  3.40–3.45 (m, 4H), 3.54–3.59 (m, 8H), 3.61–3.66 (m, 8H), 3.67 (s, 1H), 3.70–3.77 (m, 10H), 3.82–3.88 (m, 4H), 4.36–4.41 (m, 1H), 7.55–7.56 (m, 2H), 7.84–7.85 (m, 2H);  $^{13}\text{C}$  NMR ( $\text{CD}_3\text{OD}$ , 126 MHz)  $\delta$  51.9 (1C), 62.45–62.50 (m, 8C), 70.0 (2C), 70.8–70.9 (m, 4C), 80.4 (2C), 81.1 (1C), 83.1–83.2 (m, 4C), 83.6 (1C), 127.0 (1C), 128.7 (2C), 133.0 (2C), 135.8 (1C), 169.5 (1C); IR (KBr,  $\text{cm}^{-1}$ ) 1033, 1053, 1109, 1318, 1347, 1402, 1465, 1549, 1646, 2844, 2883, 2940, 3357; HRMS (ESI $^+$ )

$m/z$  686.2990 ( $[M+Na]^+$ ,  $C_{30}H_{49}NNaO_{15}^+$  requires 686.2994).

### Platform-HTL conjugate **S25**

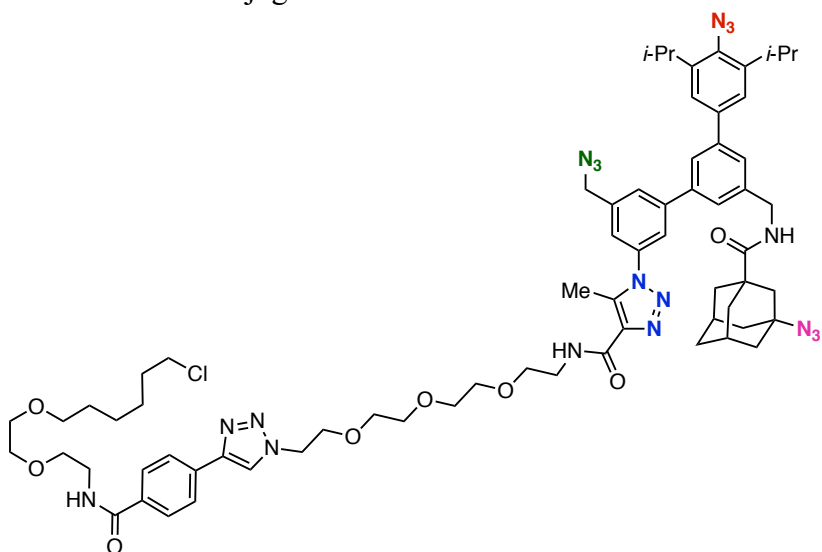

Pale brown solid; Mp 60–62 °C (decomp.); TLC  $R_f$  0.45 (EtOAc/MeOH = 9/1); HPLC analysis:  $R_t$  = 30.4 min [column: Shiseido CAPCELL PAK MG II (4.6 mm i.d. × 250 mm); mobile phase:  $CH_3CN:H_2O$  = 40:60 (0–5 min), linear gradient from 40:60 to 99:1 (5–25 min), 99:1 (25–35 min); flow rate: 1.00 mL/min; detection: UV at 254 nm];  $^1H$  NMR ( $CDCl_3$ , 500 MHz)  $\delta$  1.30–1.43 (m, 16H), 1.54–1.43 (m, 2H), 1.69 (br s, 2H), 1.69–1.89 (m, 10H), 1.94 (s, 2H), 2.29 (m, 2H), 2.64 (s, 3H), 3.38–3.49 (m, 6H), 3.58–3.60 (m, 2H), 3.65–3.71 (m, 18H), 3.95 (t, 2H,  $J$  = 5.0 Hz), 4.56 (s, 2H), 4.59–4.62 (m, 4H), 6.39 (t, 1H,  $J$  = 5.6 Hz), 6.85–6.86 (m, 1H), 7.32 (s, 2H), 7.39 (m, 1H), 7.46 (s, 2H), 7.62–7.64 (m, 3H), 7.71 (s, 1H), 7.78–7.80 (m, 2H), 7.83–7.85 (m, 2H), 8.11 (s, 1H);  $^{13}C$  NMR ( $CDCl_3$ , 126 MHz)  $\delta$  9.7, 23.5, 25.3, 26.6, 28.9, 29.4, 29.5, 32.4, 34.8, 38.0, 38.7, 39.7, 40.5, 43.1, 43.2, 45.0, 50.3, 53.9, 58.9, 69.4, 69.6, 69.7, 70.0, 70.2, 70.4, 70.49, 70.50, 70.6, 71.2, 121.7, 122.9, 123.3, 123.7, 125.1, 125.4, 126.5, 127.5, 128.1, 133.70, 133.71, 135.1, 136.4, 136.7, 138.2, 138.6, 138.9, 139.9, 140.2, 142.7, 143.4, 143.7, 146.5; IR (KBr,  $cm^{-1}$ ) 860, 1109, 1255, 1284, 1325, 1339, 1348, 1447, 1456, 1490, 1522, 1586, 1652, 2862, 2912, 2933, 3341; HRMS (ESI $^+$ )  $m/z$  1341.6499 ( $[M+Na]^+$ ,  $C_{68}H_{87}^{35}ClN_{18}NaO_8^+$  requires 1341.6535).

HPLC chart:

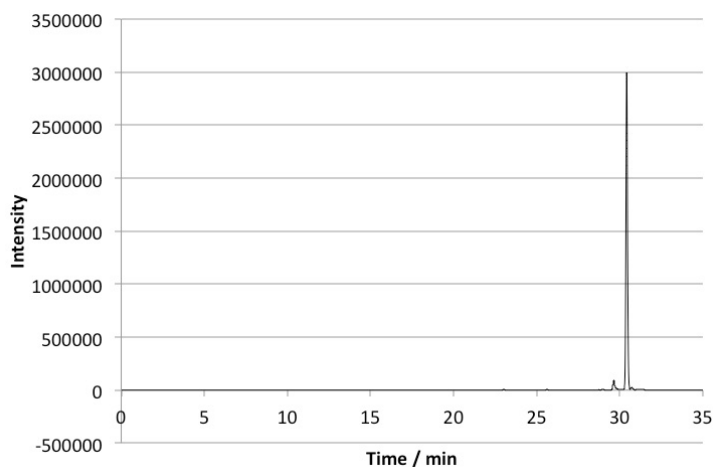

Platform-HTL-BODIPY conjugate **S26**

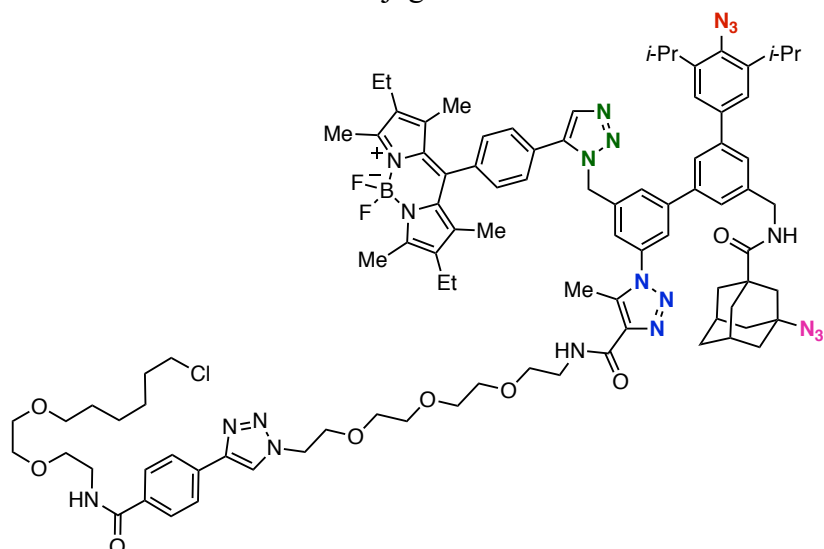

Red solid; Mp 95–97 °C (decomp.); TLC  $R_f$  0.51 (EtOAc/MeOH = 9/1); HPLC analysis:  $R_t$  = 33.3 min [column: Shiseido CAPCELL PAK MG II (4.6 mm i.d. × 250 mm); mobile phase: CH<sub>3</sub>CN:H<sub>2</sub>O = 40:60 (0–5 min), linear gradient from 40:60 to 99:1 (5–25 min), 99:1 (25–35 min); flow rate: 1.00 mL/min; detection: UV at 254 nm]; <sup>1</sup>H NMR (CDCl<sub>3</sub>, 500 MHz)  $\delta$  0.91 (t, 6H,  $J$  = 7.6 Hz), 1.16 (s, 6H), 1.28–1.43 (m, 16H), 1.53–1.61 (m, 2H), 1.63 (br s, 2H), 1.69–1.88 (m, 10H), 1.92 (br s, 2H), 2.19–2.25 (m, 4H), 2.27–2.31 (m, 2H), 2.51 (s, 6H), 2.56 (s, 3H), 3.38–3.49 (m, 6H), 3.58–3.60 (m, 2H), 3.61–3.71 (m, 18H), 3.92 (t, 2H,  $J$  = 5.0 Hz), 4.56–4.60 (m, 4H), 5.81 (s, 2H), 6.33 (t, 1H,  $J$  = 5.8 Hz), 6.85 (t, 1H,  $J$  = 5.0 Hz), 7.12 (br s, 1H), 7.28 (s, 2H), 7.38–7.42 (m, 3H), 7.45 (br s, 1H), 7.48–7.52 (m, 2H), 7.53–7.56 (m, 2H), 7.58–7.62 (m, 2H), 7.76–7.80 (m, 2H), 7.81–7.85 (m, 2H), 7.89 (s, 1H), 8.09 (s, 1H); <sup>13</sup>C NMR (CDCl<sub>3</sub>, 126 MHz)  $\delta$  9.7, 11.8, 12.5, 14.6, 17.0, 23.5, 25.4, 26.6, 28.9, 29.4, 29.5, 32.5, 34.8, 38.0, 38.7, 39.7, 40.5, 43.1, 43.2, 45.0, 50.4, 51.3, 58.9, 69.4, 69.7, 69.8, 70.0, 70.2, 70.43, 70.49, 70.5, 70.6, 71.3, 121.8, 122.3, 122.9, 123.9, 125.1, 125.4, 125.5, 126.7, 127.01, 127.04, 127.5, 129.2, 129.6, 130.4, 133.1, 133.70, 133.71, 133.8, 135.2, 136.6, 136.7, 137.5, 137.6, 137.7, 137.9, 138.1, 138.7, 138.8, 139.6, 140.3, 142.8, 143.6, 143.7, 146.5, 154.4, 161.0, 167.0, 176.1; IR (KBr, cm<sup>-1</sup>) 1192, 1321, 1539, 1651, 2089, 2116, 2928; HRMS (ESI<sup>+</sup>)  $m/z$  1745.8769 ([M+Na]<sup>+</sup>, C<sub>93</sub>H<sub>114</sub><sup>11</sup>B<sup>35</sup>ClF<sub>2</sub>N<sub>20</sub>NaO<sub>8</sub><sup>+</sup> requires 1745.8770).

HPLC chart:

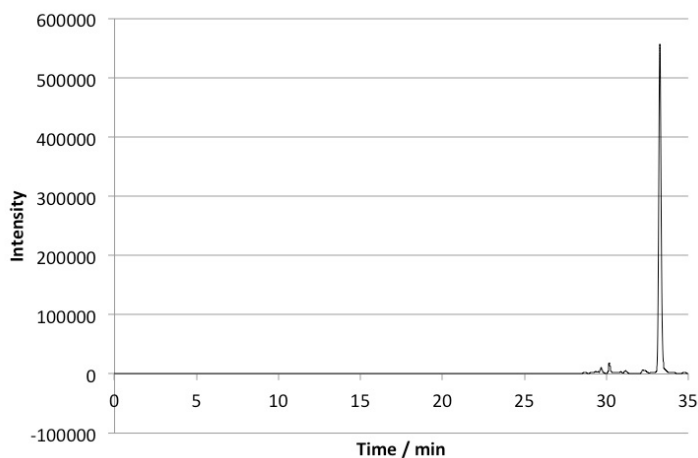

Platform-HTL-BODIPY-biotin conjugate **26**

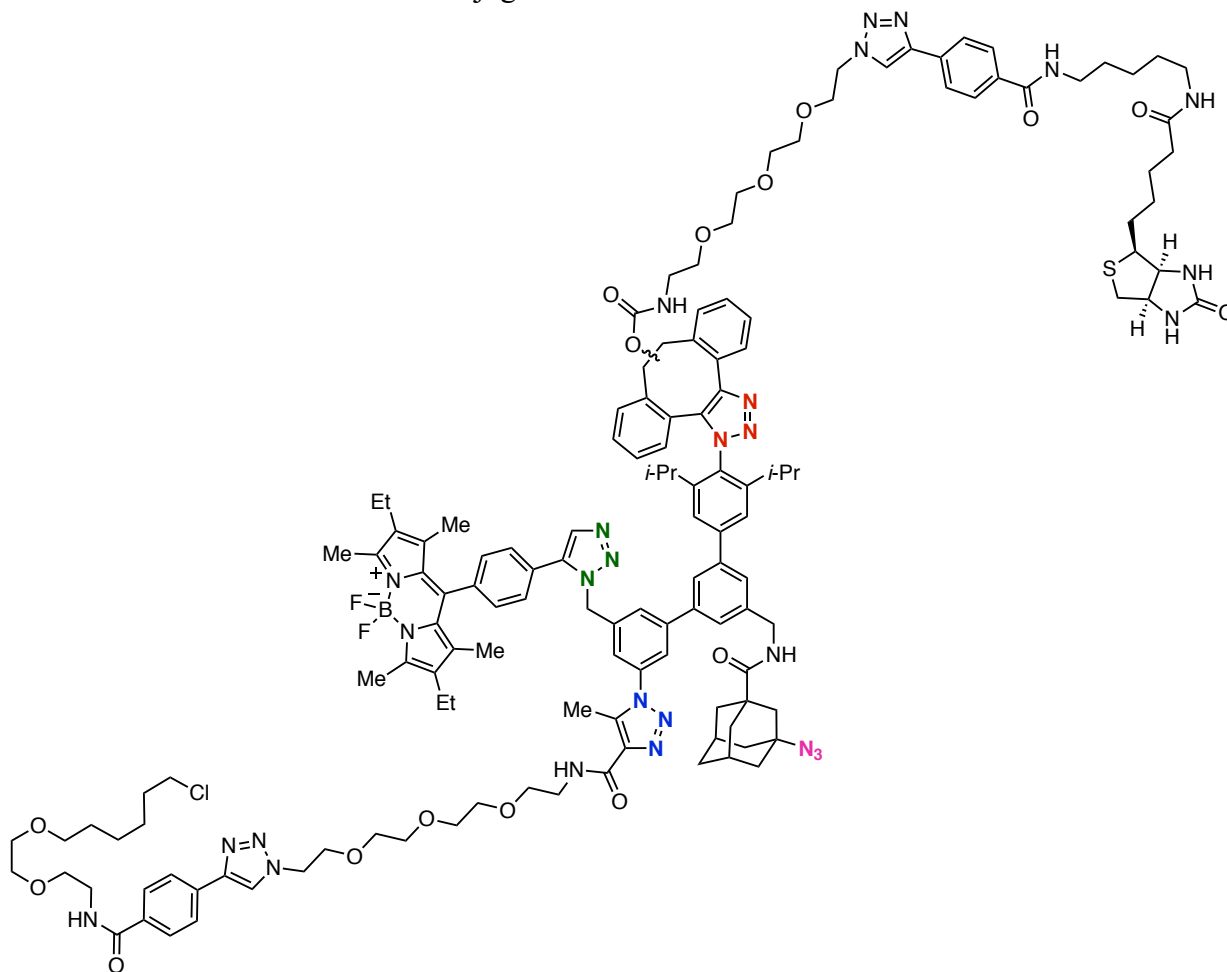

Red solid; TLC  $R_f$  0.20 ( $\text{CH}_2\text{Cl}_2/\text{MeOH} = 9/1$ ); HPLC analysis:  $R_t = 27.1$  min (51%) and 27.4 (49%) [column: Shiseido CAPCELL PAK MG II (4.6 mm i.d.  $\times$  250 mm); mobile phase:  $\text{CH}_3\text{CN}:\text{H}_2\text{O} = 40:60$  (0–5 min), linear gradient from 40:60 to 99:1 (5–25 min), 99:1 (25–35 min); flow rate: 1.00 mL/min; detection: UV at 254 nm]; IR (KBr,  $\text{cm}^{-1}$ ) 1192, 1454, 1539, 1645, 2089, 2932; HRMS (ESI<sup>+</sup>)  $m/z$  2666.3073 ([ $\text{M}+\text{Na}$ ]<sup>+</sup>,  $\text{C}_{142}\text{H}_{174}^{11}\text{B}^{35}\text{ClF}_2\text{N}_{28}\text{NaO}_{16}\text{S}^+$  requires 2666.3025).

HPLC chart:

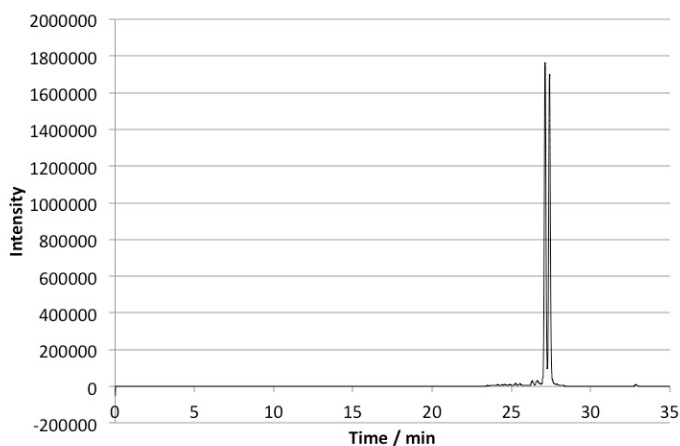



Platform-HTL-BODIPY-biotin-BGL conjugate **27**

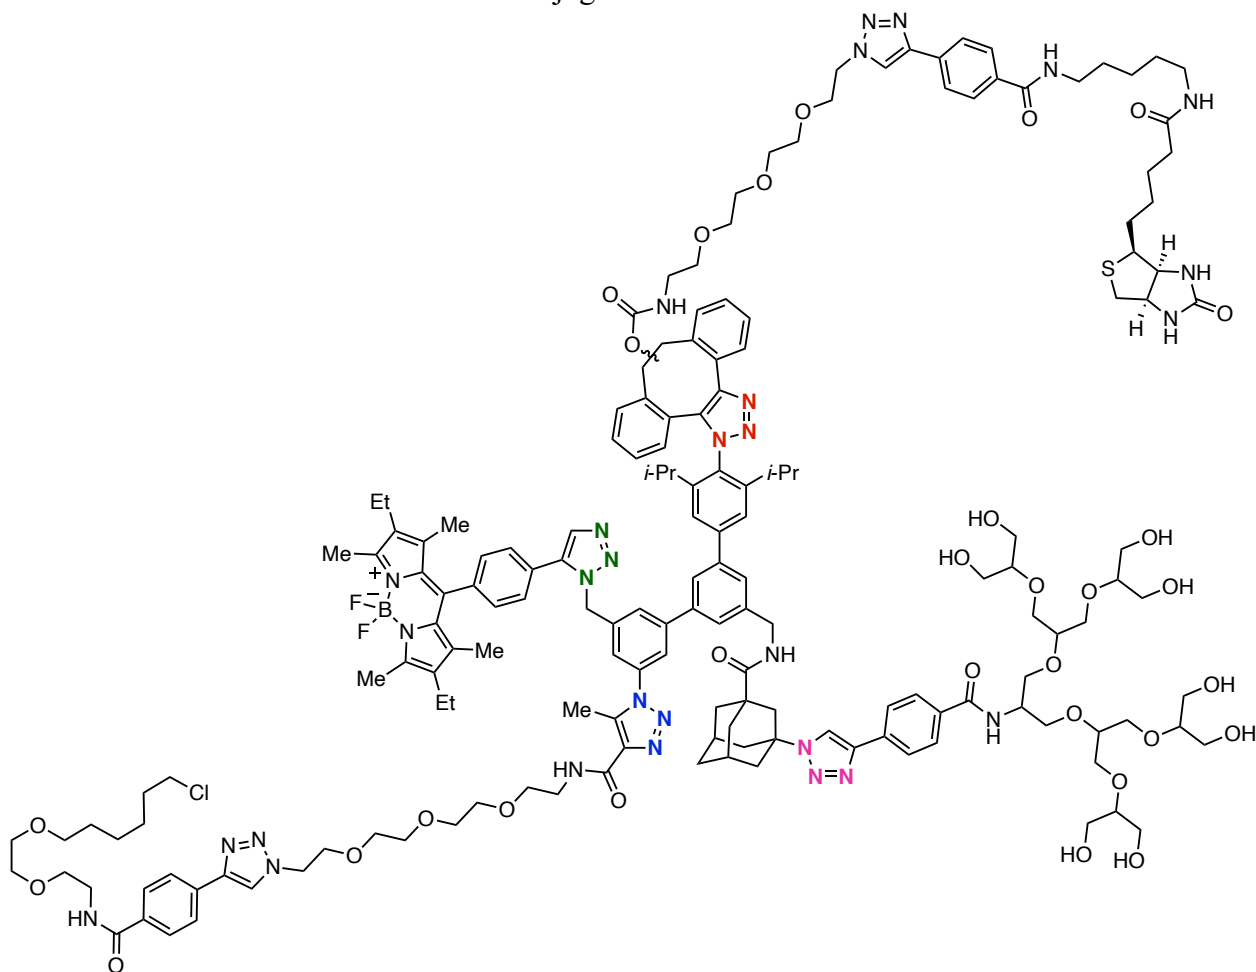

Red solid; TLC  $R_f$  0.27 (tailing) ( $\text{CH}_2\text{Cl}_2/\text{MeOH} = 8/2$ ); HPLC analysis:  $R_t = 21.2$  min (51%) and 21.6 min (49%) [column: Shiseido CAPCELL PAK MG II (4.6 mm i.d.  $\times$  250 mm); mobile phase:  $\text{CH}_3\text{CN}:\text{H}_2\text{O} = 40:60$  (0–5 min), linear gradient from 40:60 to 99:1 (5–25 min), 99:1 (25–35 min); flow rate: 1.00 mL/min; detection: UV at 254 nm]; IR (KBr,  $\text{cm}^{-1}$ ) 1193, 1454, 1537, 1645, 2928, 3337; HRMS (ESI<sup>+</sup>)  $m/z$  3329.6127 ( $[\text{M}+\text{Na}]^+$ ,  $\text{C}_{172}\text{H}_{223}^{11}\text{B}^{35}\text{ClF}_2\text{N}_{29}\text{NaO}_{31}\text{S}^+$  requires 3329.6127).

HPLC chart:

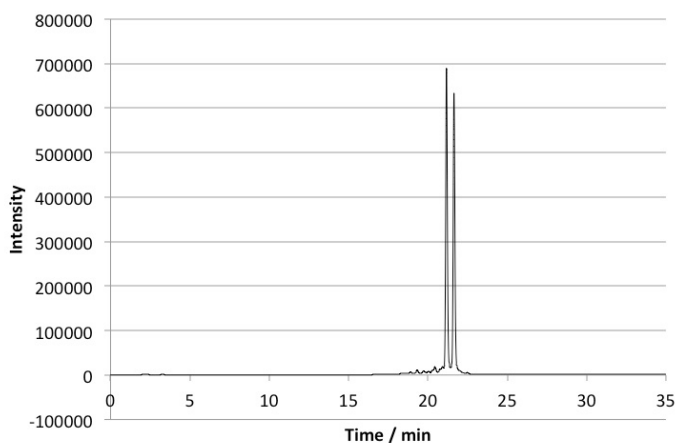

## Platform-HTL-BODIPY-biotin-Alexa555 conjugate **28**

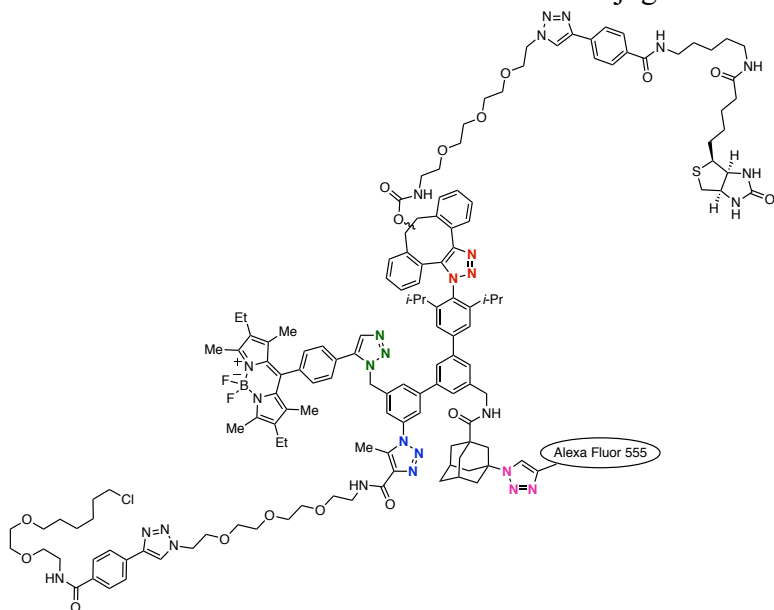

Red solid; TLC  $R_f$  0.45 ( $\text{CH}_2\text{Cl}_2/\text{MeOH} = 7/3$ ); HPLC analysis:  $R_t = 14.6$  min [column: Shiseido CAPCELL PAK MG II (4.6 mm i.d.  $\times$  250 mm); mobile phase:  $\text{MeOH}:\text{H}_2\text{O} = 40:60$  (0–5 min), linear gradient from 40:60 to 99:1 (5–10 min), 99:1 (10–25 min); flow rate: 1.00 mL/min; detection: UV at 550 nm]

HPLC chart:

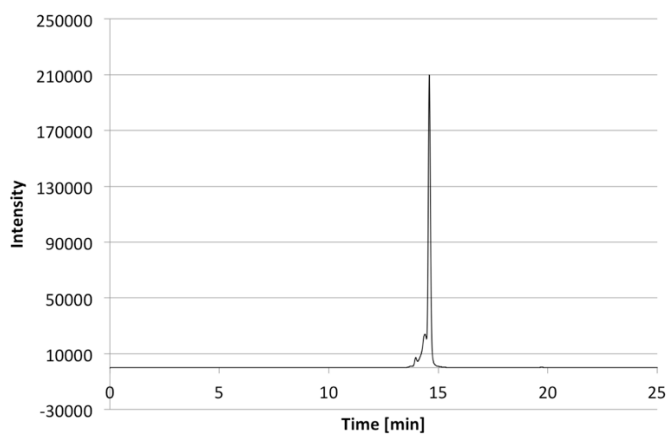

## Absorption and Fluorescent Properties and Spectra

### Platform-HTL-BODIPY-biotin conjugate **26**

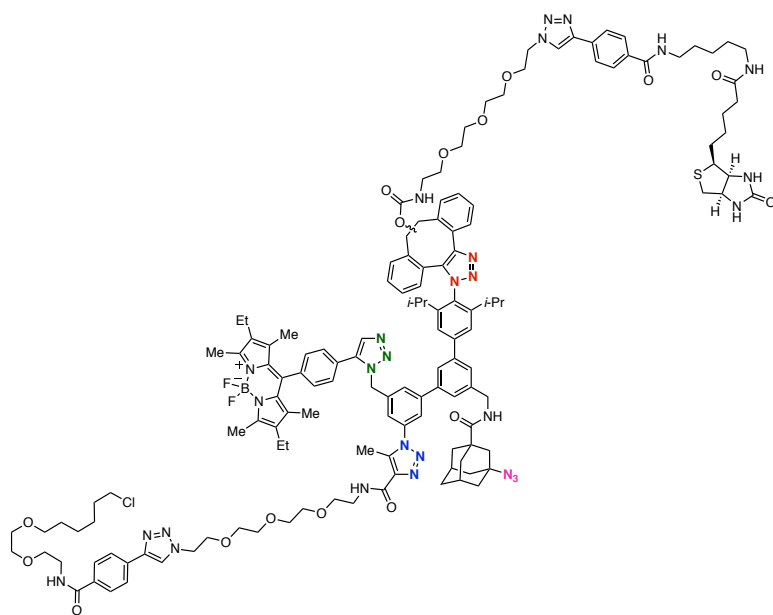

In MeOH

UV/Vis (4  $\mu\text{M}$ ):  $\lambda_{\text{max}} (\epsilon) = 526 (79341) \text{ nm}$

FL (4  $\mu\text{M}$ ):  $\lambda_{\text{max}} = 538 \text{ nm}$  (excited at 350 nm)

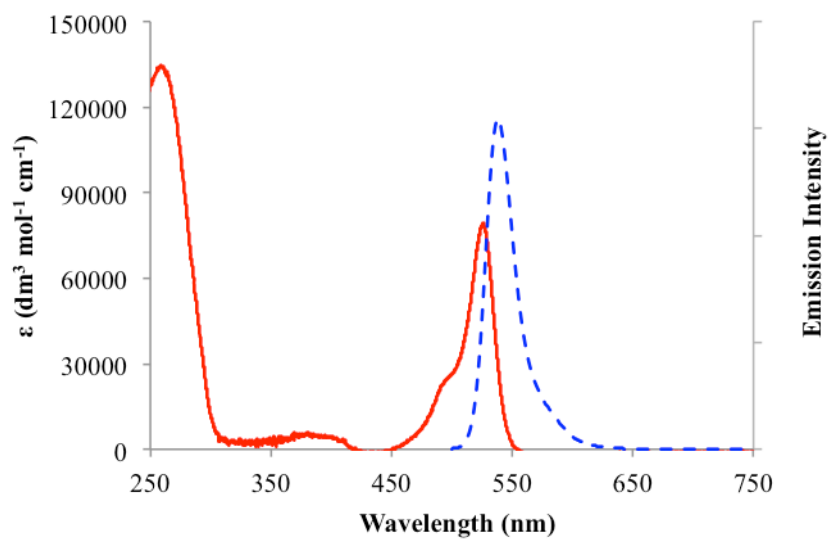



## Platform-HTL-BODIPY-biotin-Alexa555 conjugate **28**

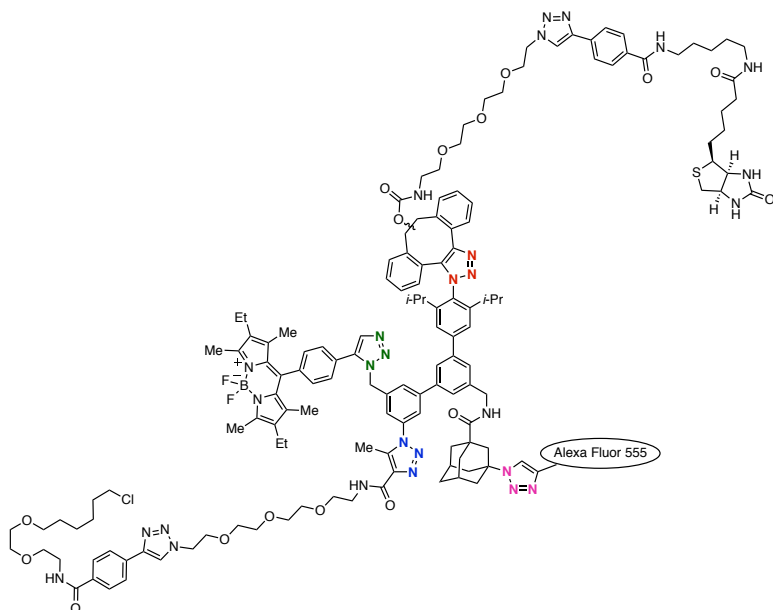

In MeOH

UV/Vis (4  $\mu\text{M}$ ):  $\lambda_{\text{max}} (\epsilon) = 523 (165620), 555 (212082) \text{ nm}$

FL (4  $\mu\text{M}$ ):  $\lambda_{\text{max}} = 572 \text{ nm}$  (excited at 350 nm)

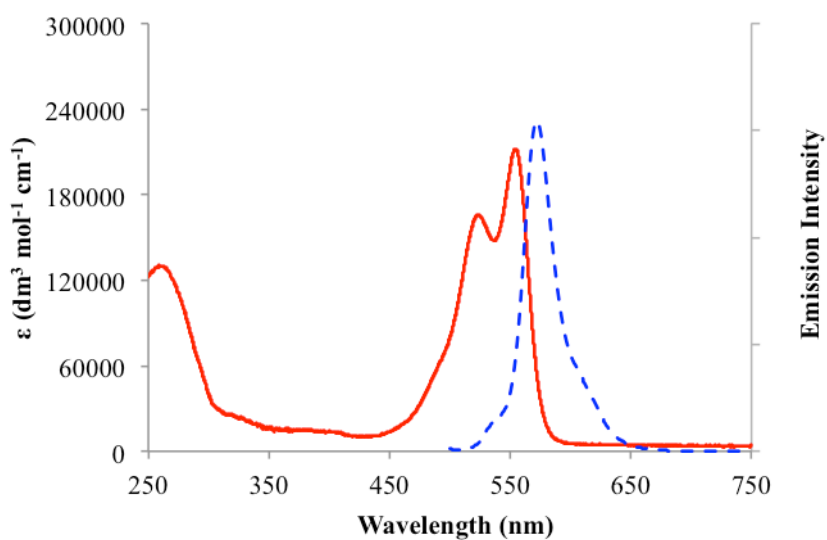

Merged absorption spectra of **26–28** (1  $\mu\text{M}$  in MeOH) (**26**: red, **27**: blue, **28**: green)

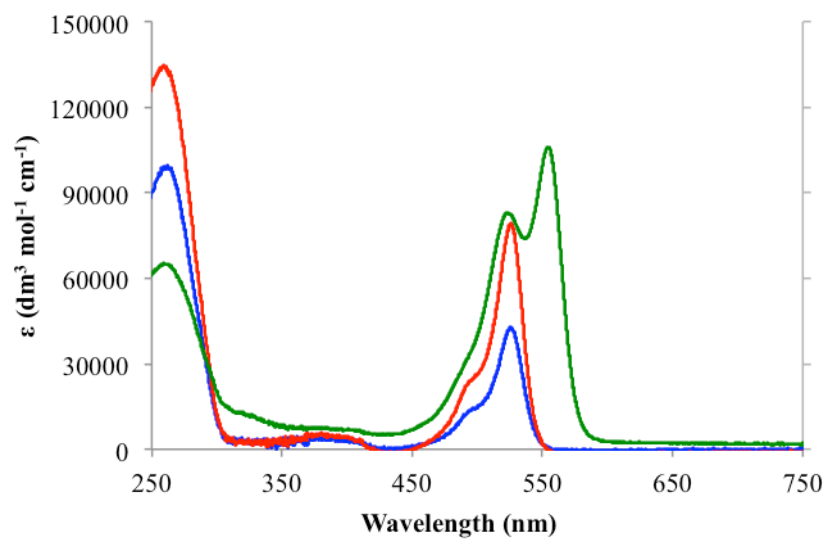

Merged fluorescence spectra of **26–28** (1  $\mu\text{M}$  in MeOH) (**26**: red, **27**: blue, **28**: green)

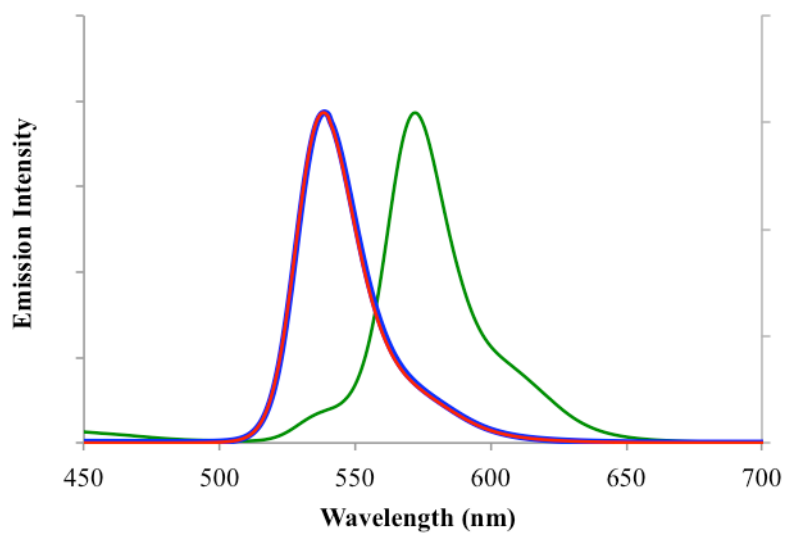

### References for Supporting Information

- S1) G.-J. Boons, J. Guo, X. Ning and M. Wolfert, WO 2009/067663, 2009.
- S2) S. Yoshida, T. Kuribara, H. Ito, T. Meguro, Y. Nishiyama, F. Karaki, Y. Hatakeyama, Y. Koike, I. Kii and T. Hosoya, *Chem. Commun.*, 2019, **55**, 3556.
- S3) S. Yoshida, K. Kanno, I. Kii, Y. Misawa, M. Hagiwara and T. Hosoya, *Chem. Commun.*, 2018, **54**, 3705.
- S4) J.-P. Berndt, A. Engel, R. Hrdina, S. Dehnen and P. R. Schreiner, *Organometallics*, 2019, **38**, 329.
- S5) C. K. L. Gordon, D. Wu, A. Pusuluri, T. A. Feagin, A. T. Csordas, M. S. Eisenstein, C. J. Hawker, J. Niu and H. T. Soh, *ACS Chem. Biol.*, 2019, **14**, 2652.
- S6) S. Shimizu, T. Hosoya, M. Murohashi and S. Yoshida, WO 2013/118842A1, 2013.
- S7) T. R. Chan, R. Hilgraf, K. B. Sharpless and V. V. Fokin, *Org. Lett.*, 2004, **6**, 2853.
- S8) I. Kii, A. Shiraishi, T. Hiramatsu, T. Matsushita, H. Uekusa, S. Yoshida, M. Yamamoto, A. Kudo, M. Hagiwara and T. Hosoya, *Org. Biomol. Chem.*, 2010, **8**, 4051.
- S9) K. Kamata, Y. Nakagawa, K. Yamaguchi and N. Mizuno, *J. Am. Chem. Soc.*, 2008, **130**, 15304.
- S10) H. Hagiwara, H. Sasaki, T. Hoshi and T. Suzuki, *Synlett*, **2009**, 643.
- S11) N. Candelon, D. Lastécouères, A. K. Diallo, J. R. Aranzaes, D. Astruca and J.-M. Vincent, *Chem. Commun.*, **2008**, 741.

## NMR Spectra of New Compounds

$^1\text{H}$  NMR (500 MHz) and  $^{13}\text{C}$  NMR (126 MHz) spectra of 1-(1-adamantyl)-4-ethoxy-1*H*-1,2,3-triazole (**10d**) ( $\text{CDCl}_3$ )

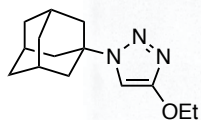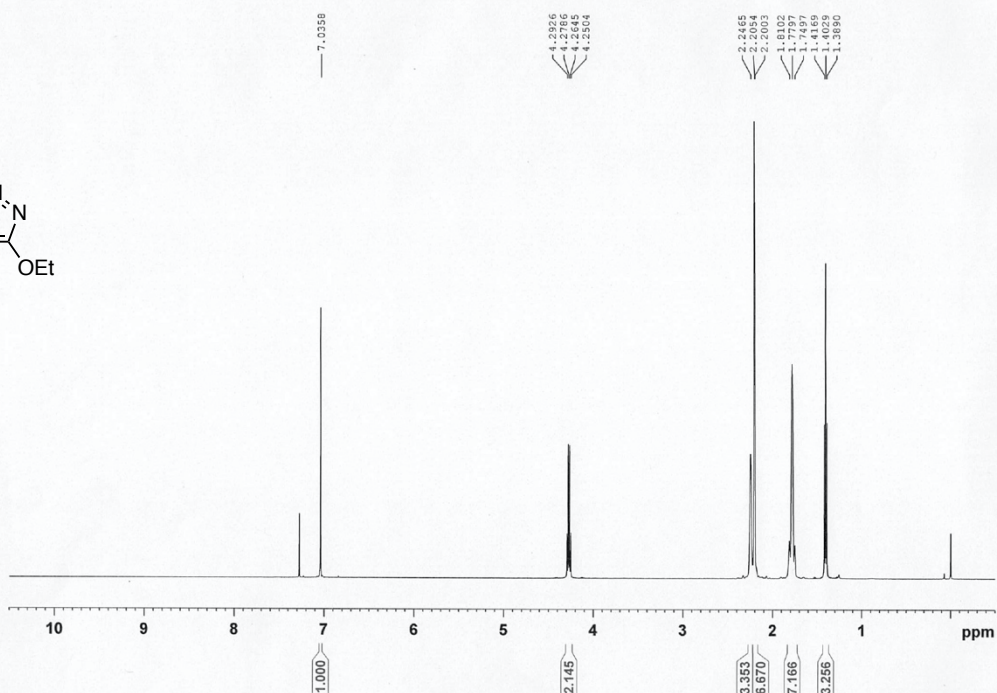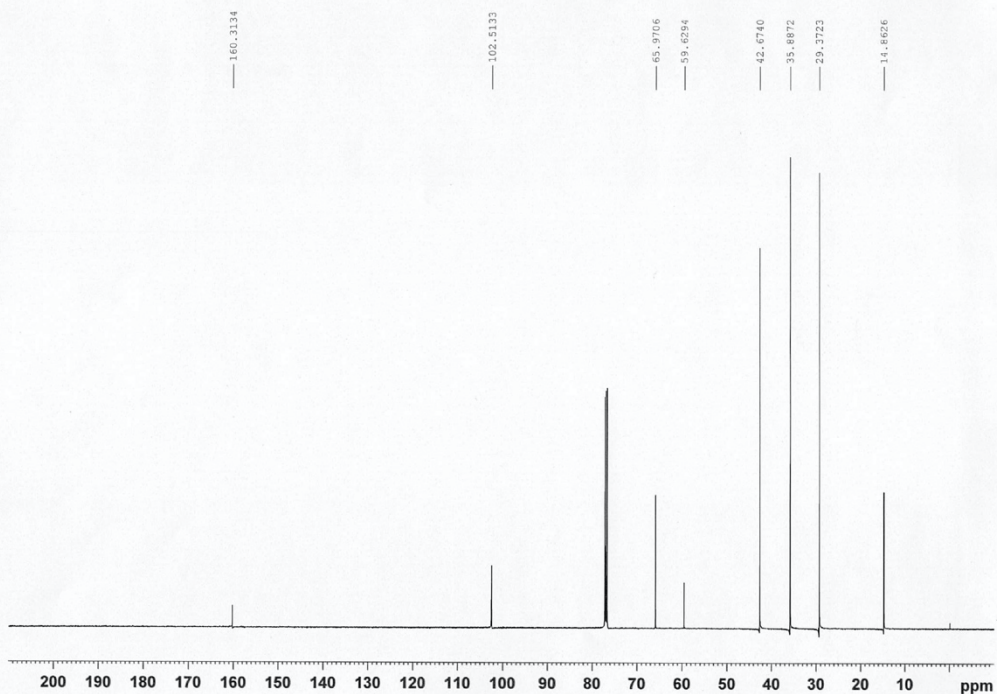



$^1\text{H}$  NMR (500 MHz) and  $^{13}\text{C}$  NMR (126 MHz) spectra of 3-azido-*N*-(4-azidobenzyl)adamantanamide (**13**) ( $\text{CDCl}_3$ )

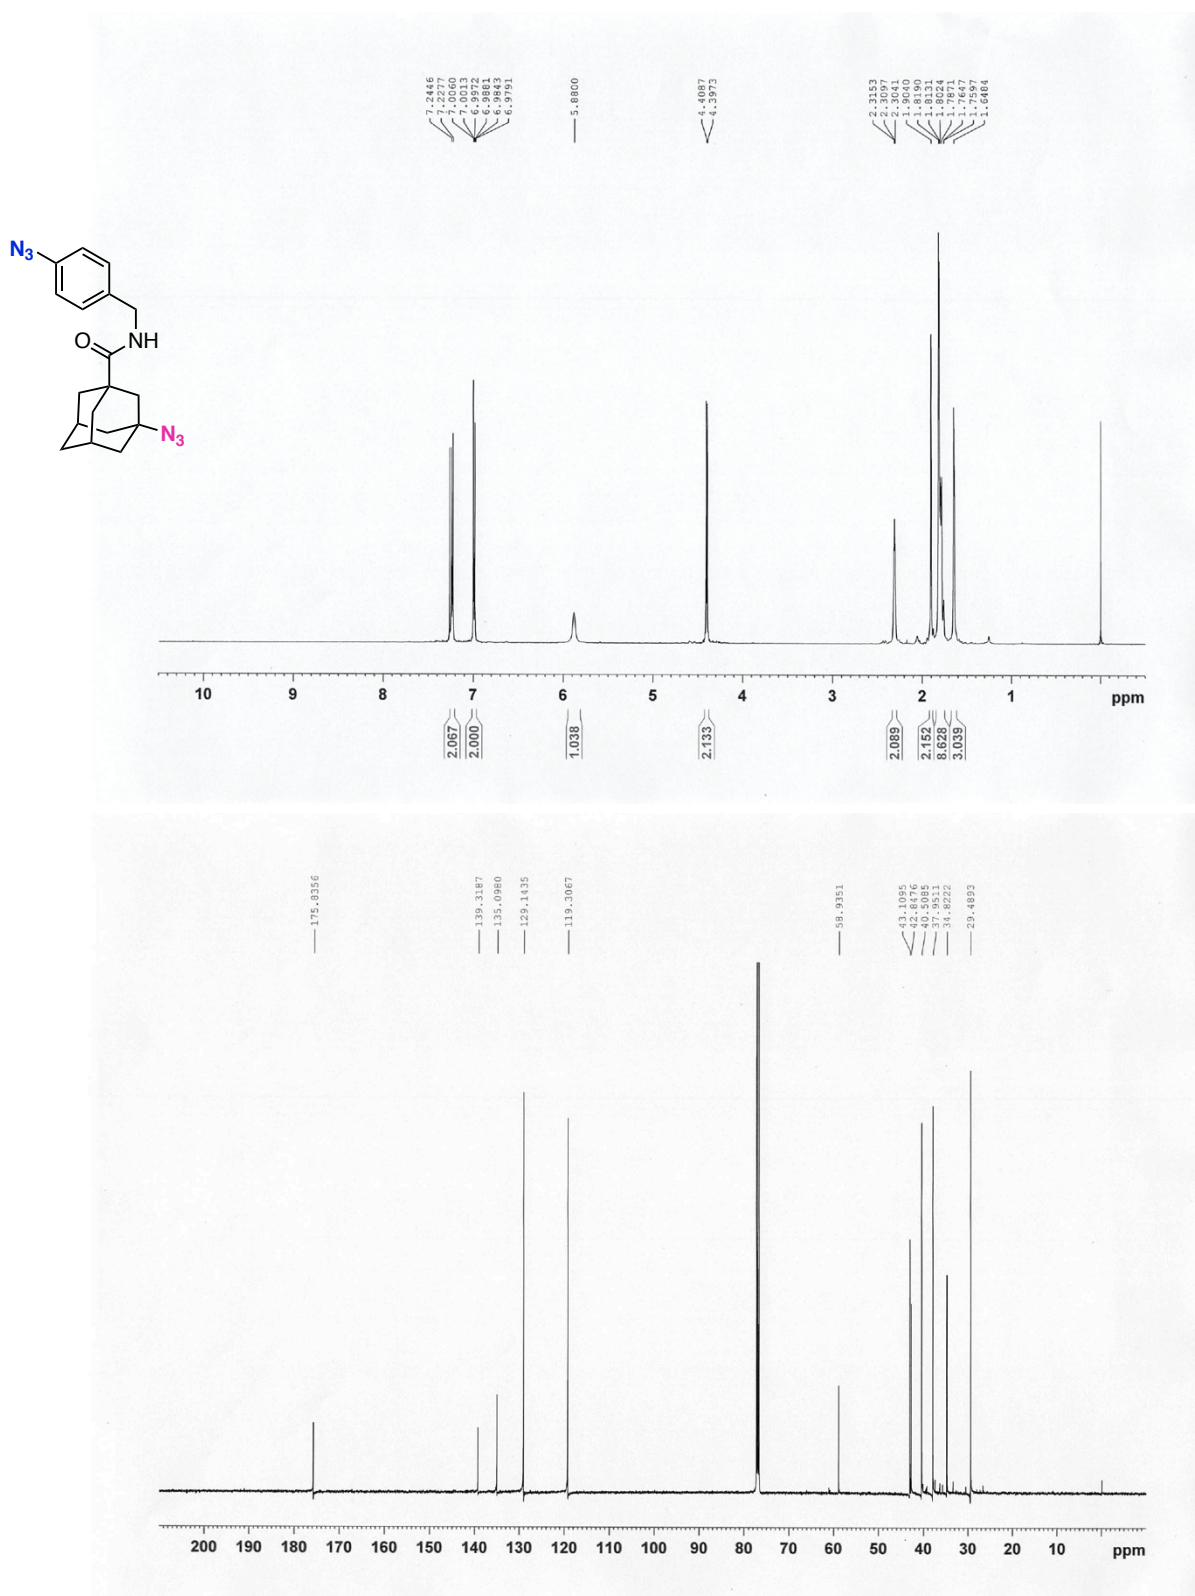

$^1\text{H}$  NMR (500 MHz) and  $^{13}\text{C}$  NMR (126 MHz) spectra of *N*-(4-(4-acetyl-5-methyl-1*H*-1,2,3-triazole-1-yl)benzyl)-3-azido-1-adamantanamide (**S3**) ( $\text{CDCl}_3$ )

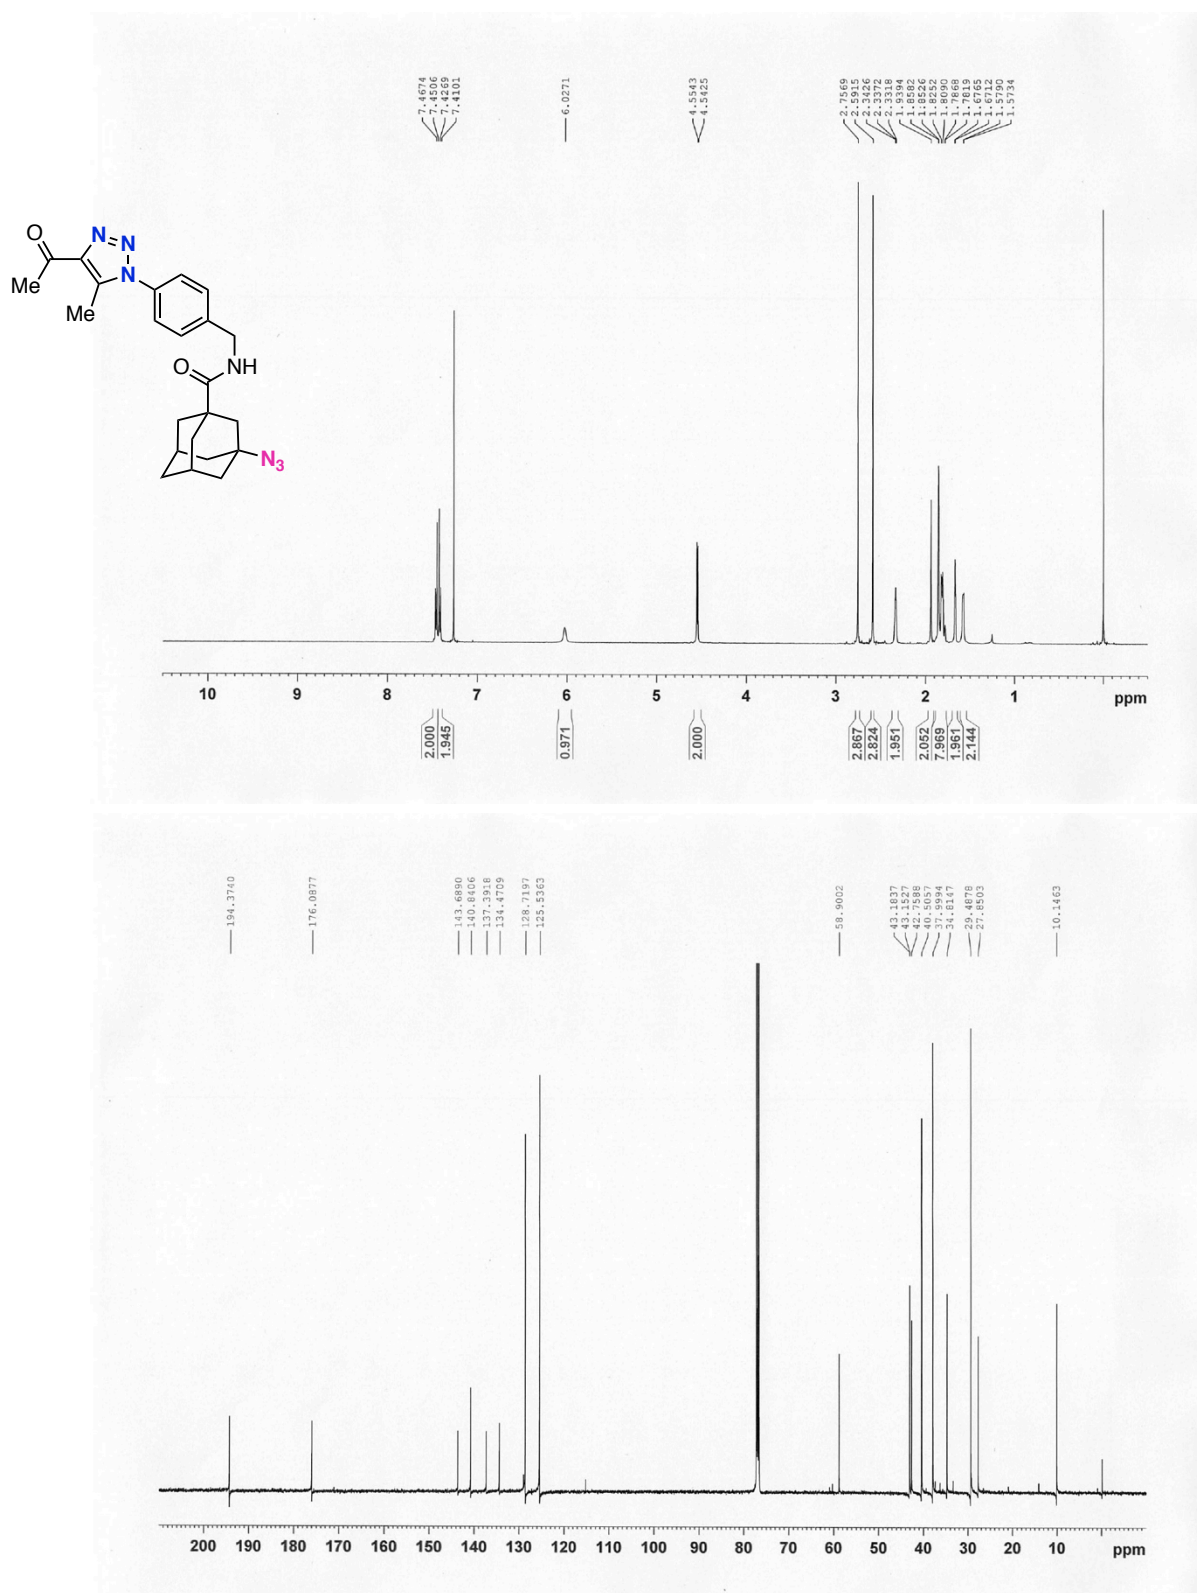

$^1\text{H}$  NMR (500 MHz) and  $^{13}\text{C}$  NMR (126 MHz) spectra of *N*-(4-(4-acetyl-5-methyl-1*H*-1,2,3-triazole-1-yl)benzyl)-3-(4-phenyl-1*H*-1,2,3-triazol-1-yl)-1-adamantanamide (**15a**) ( $\text{CDCl}_3$ )

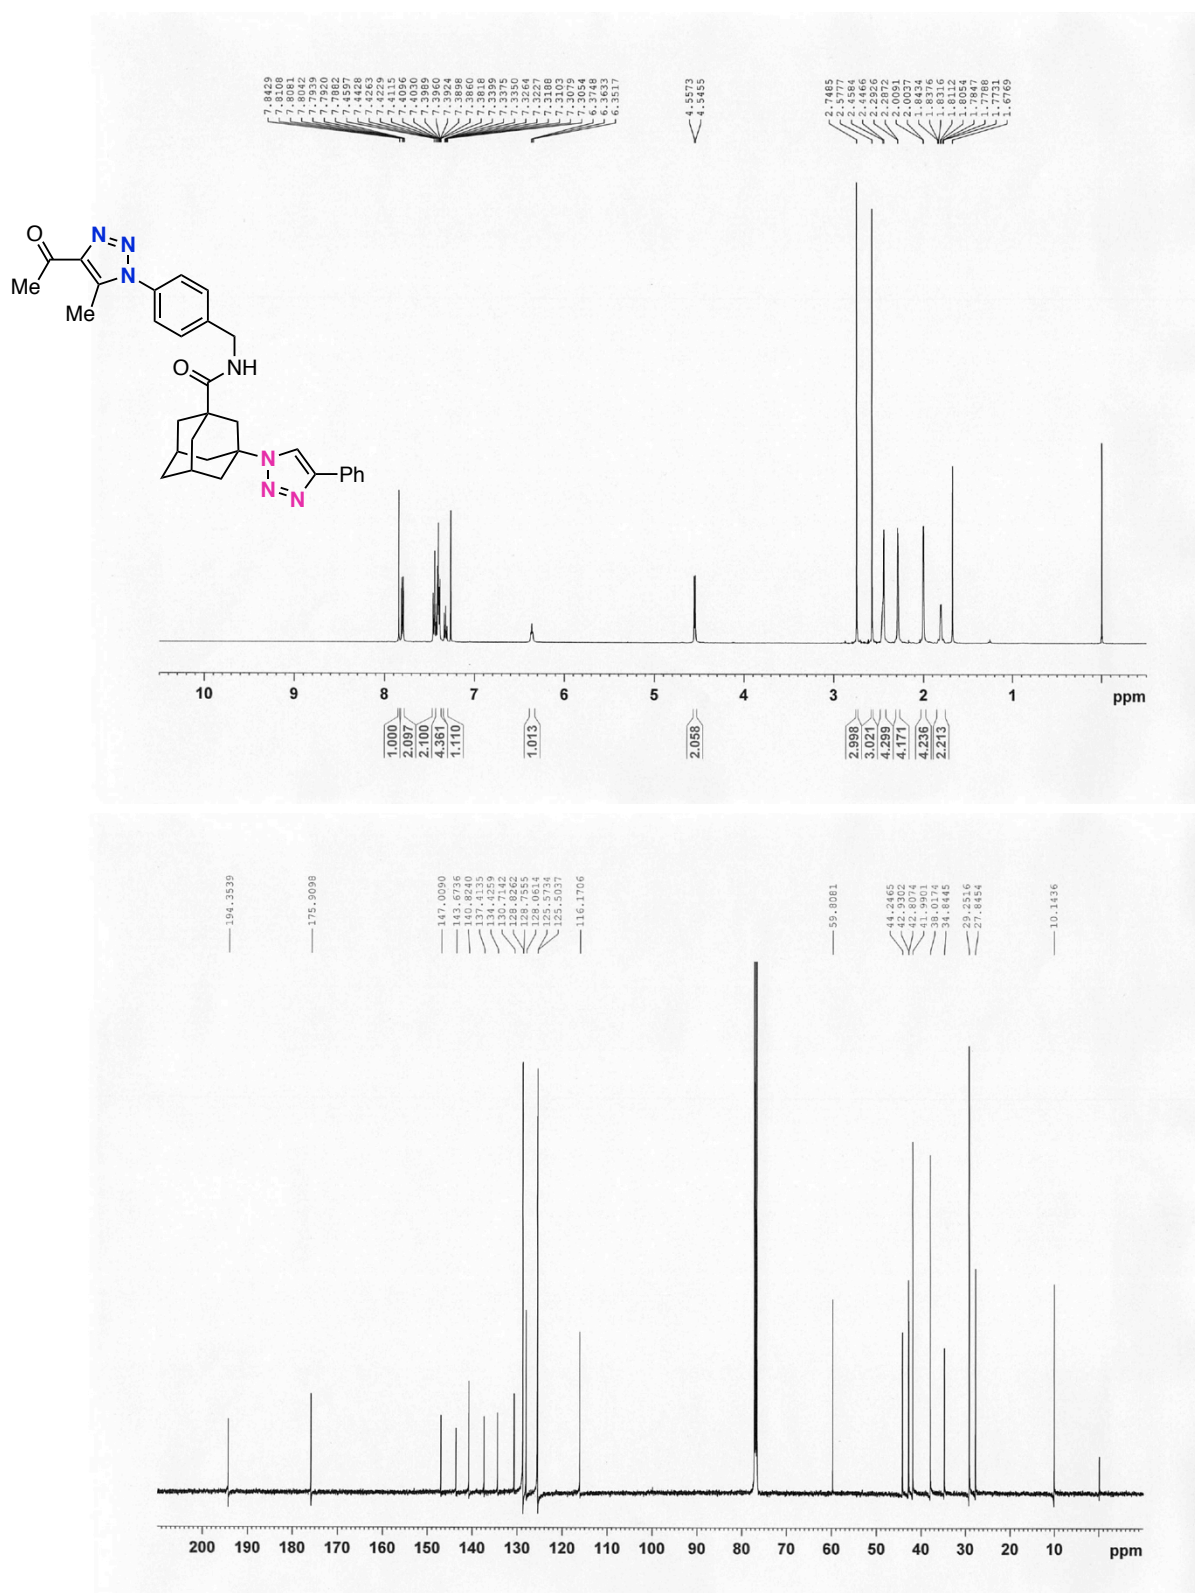



$^1\text{H}$  NMR (500 MHz) and  $^{13}\text{C}$  NMR (126 MHz) spectra of 3-azido-*N*-(4-(4-phenyl-1*H*-1,2,3-triazole-1-yl)benzyl)-1-adamantanamide (**S4**) ( $\text{CDCl}_3$ )

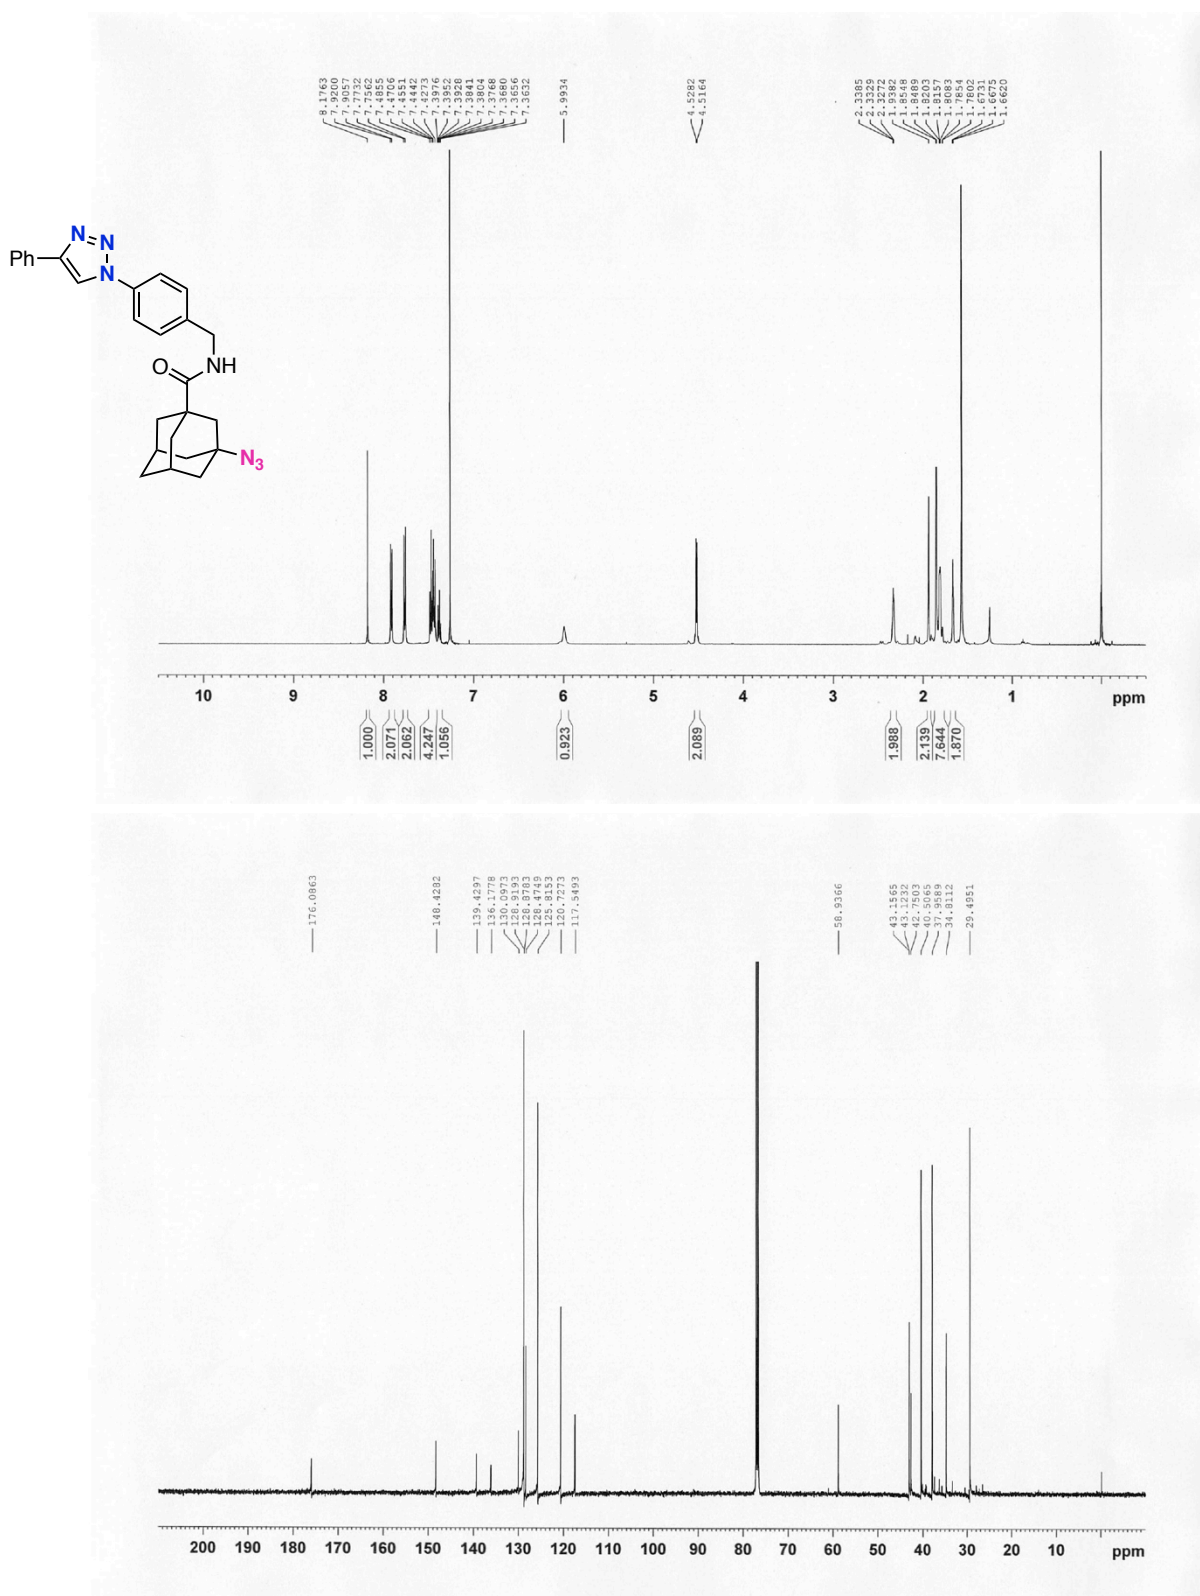

$^1\text{H}$  NMR (500 MHz) and  $^{13}\text{C}$  NMR (126 MHz) spectra of 3-(4-(1-hydroxy-1-methylethyl)-1*H*-1,2,3-triazol-1-yl)-*N*-(4-(4-phenyl-1*H*-1,2,3-triazole-1-yl)benzyl)-1-adamantanamide (**15b**) ( $\text{CDCl}_3$ )

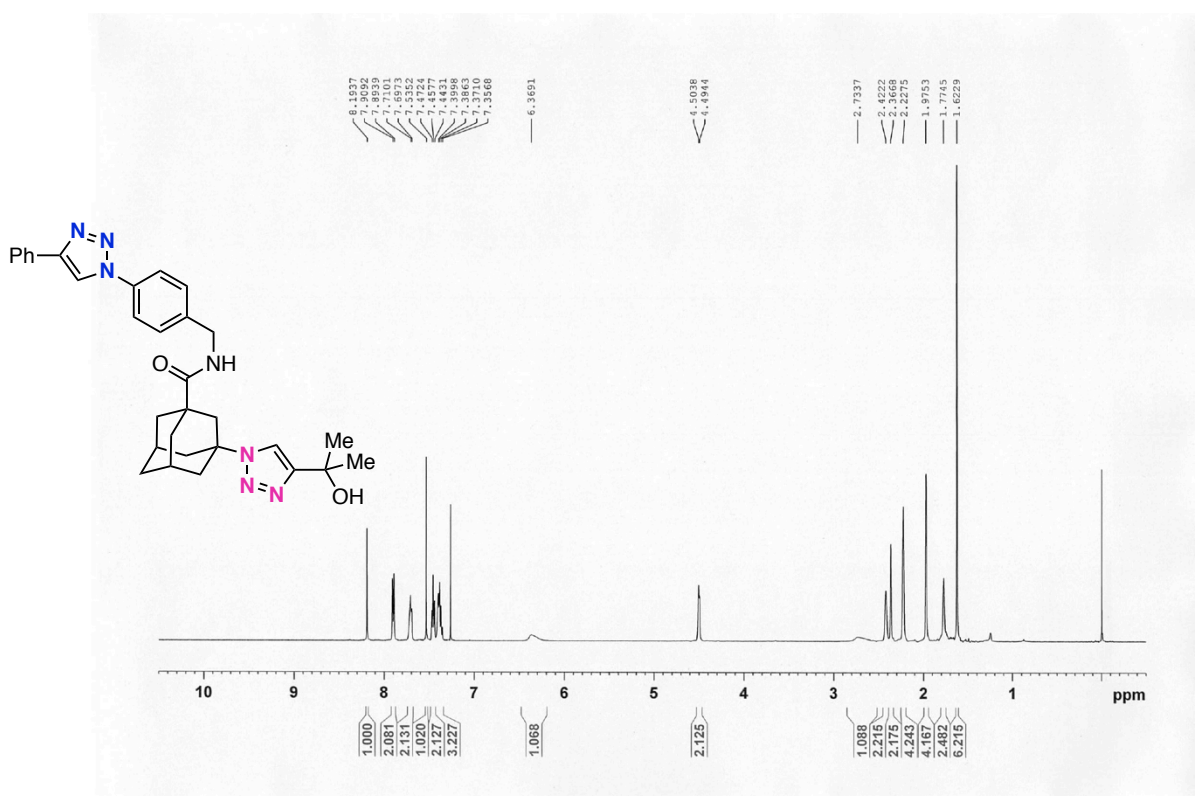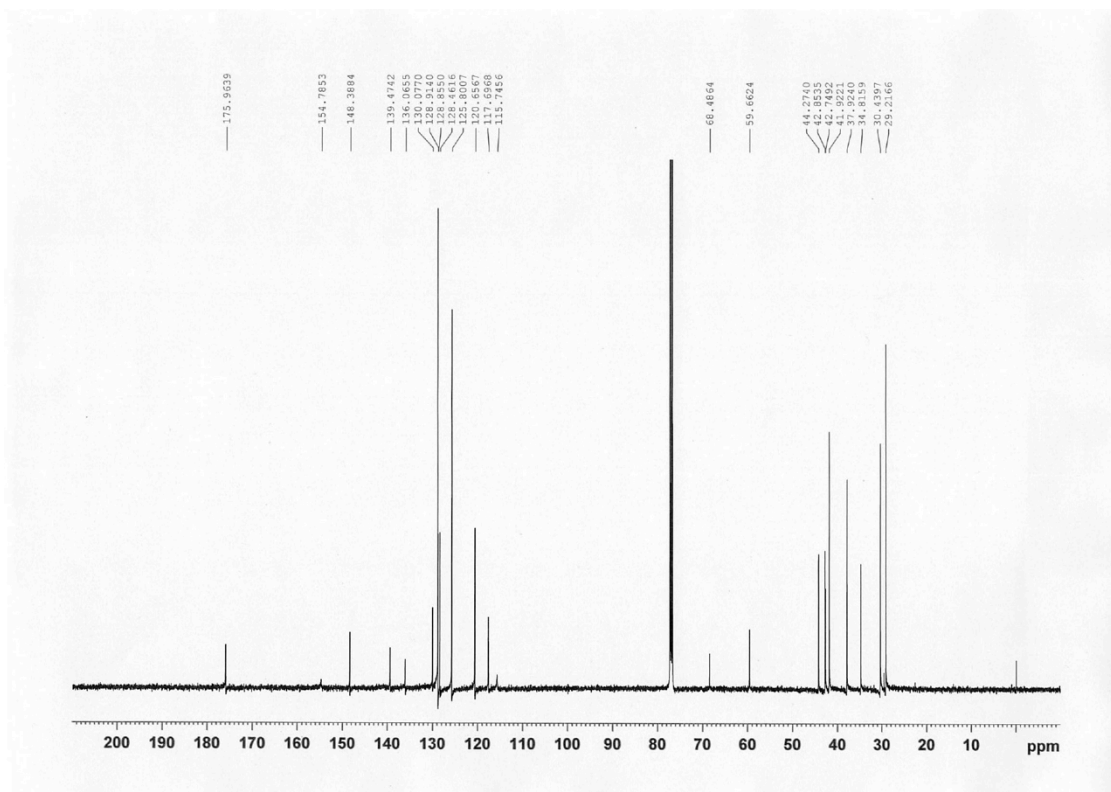

$^1\text{H}$  NMR (500 MHz) and  $^{13}\text{C}$  NMR (126 MHz) spectra of methyl 3-(4-(azidomethyl)phenyl)-5-bromobenzoate (**S7**) ( $\text{CDCl}_3$ )

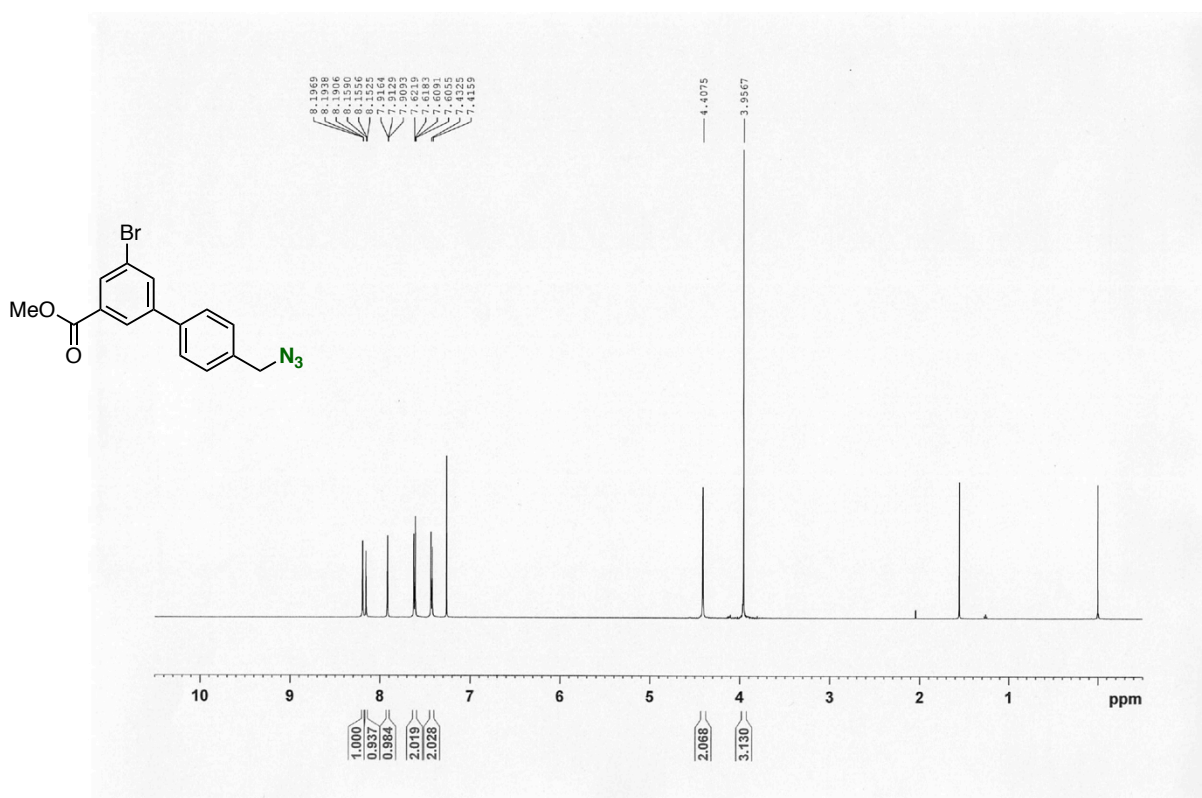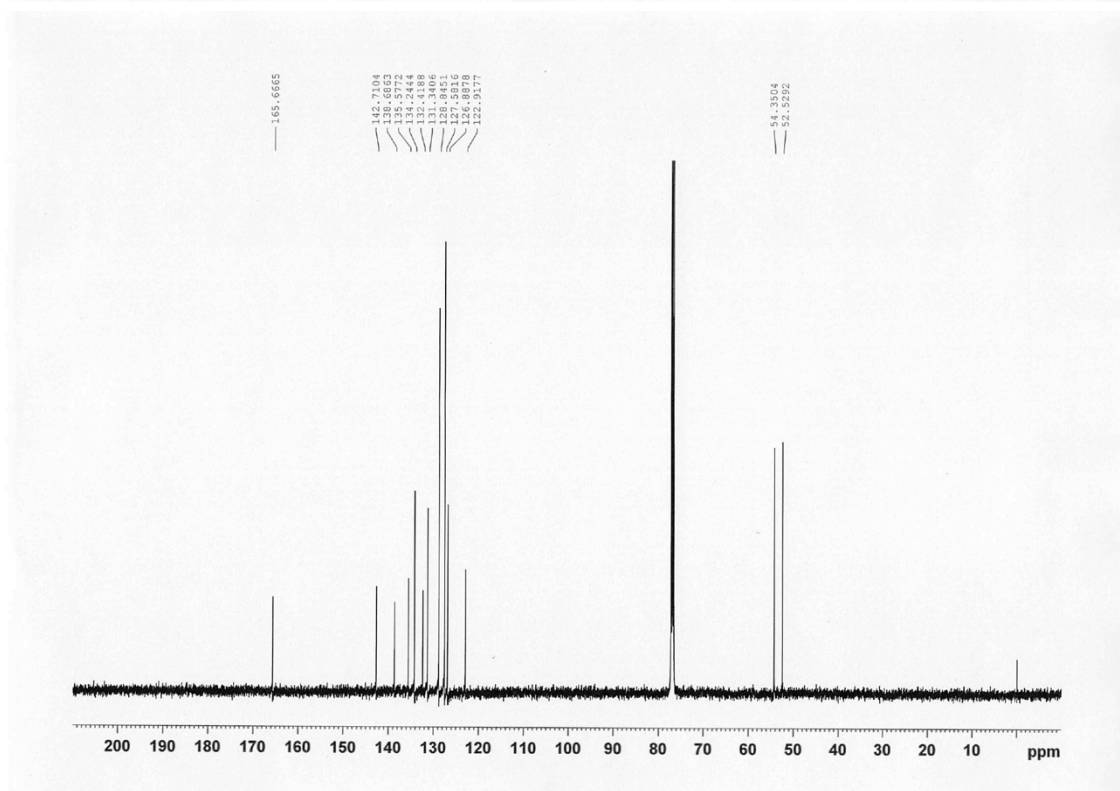



$^1\text{H}$  NMR (500 MHz) and  $^{13}\text{C}$  NMR (126 MHz) spectra of methyl 3-(4-azido-3,5-diisopropylphenyl)-5-(4-(azidomethyl)phenyl)benzoate (**S9**) ( $\text{CDCl}_3$ )

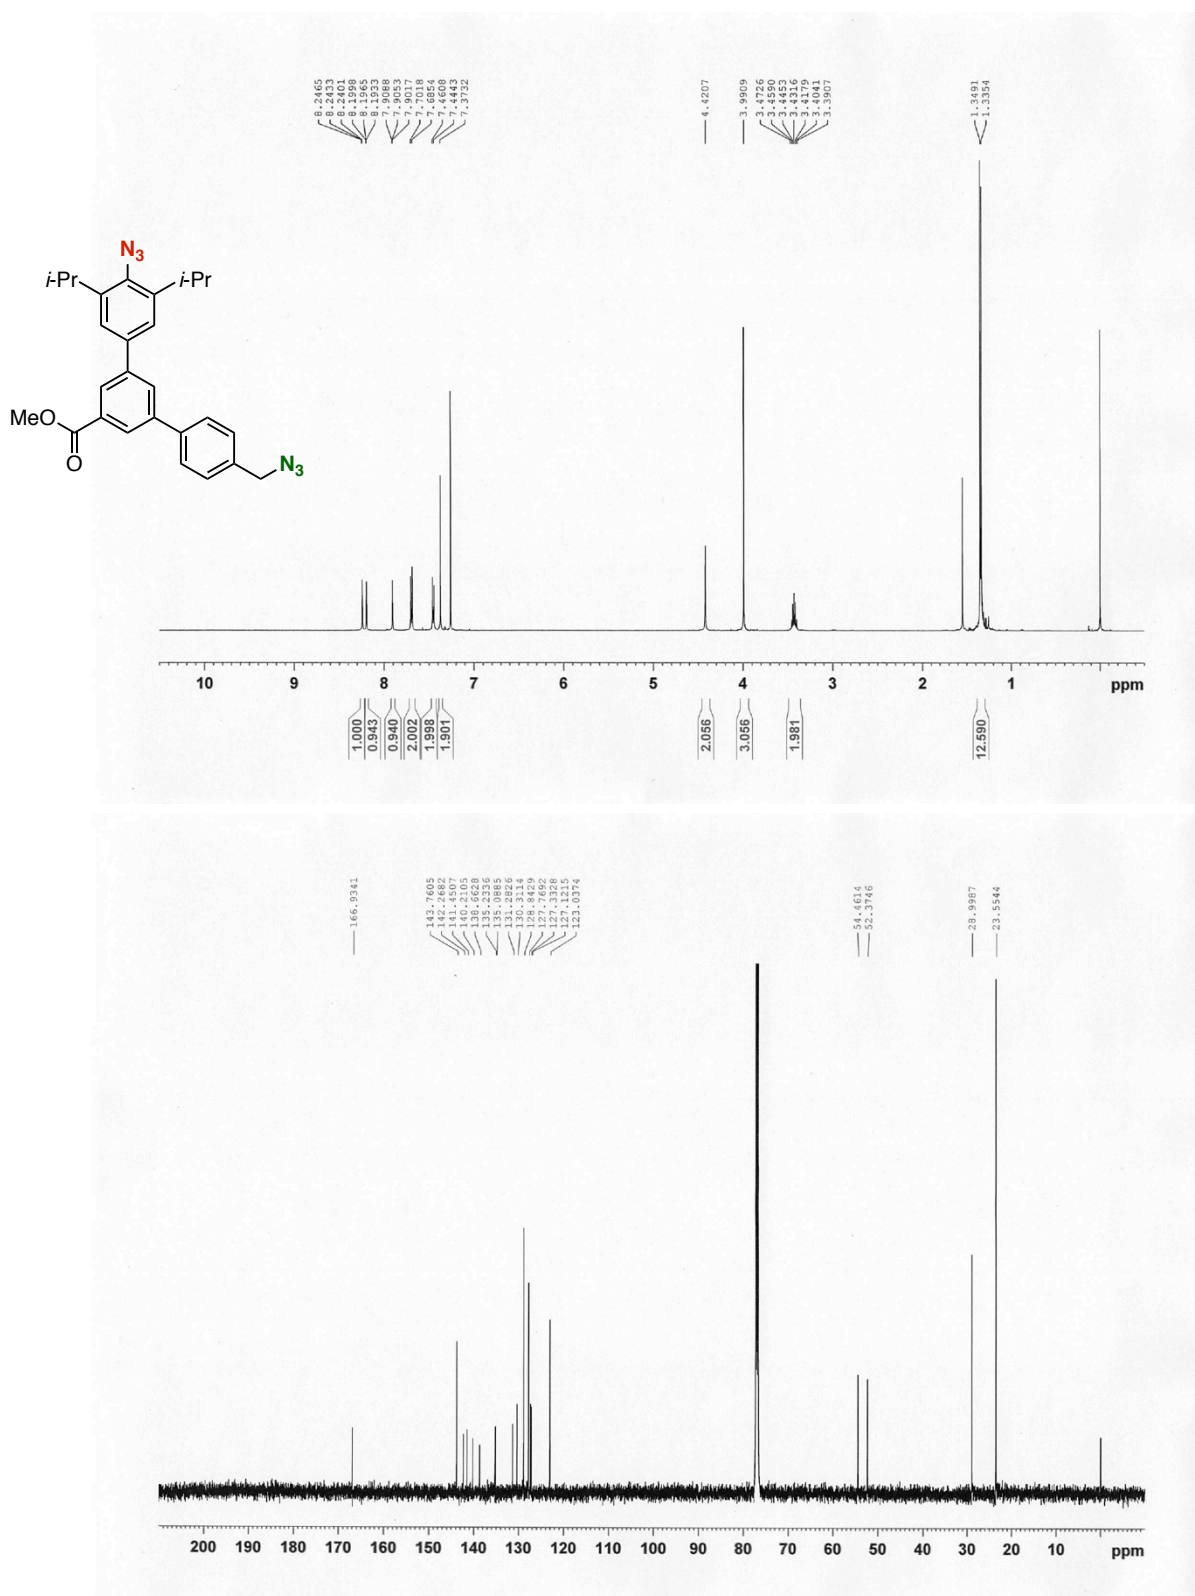

$^1\text{H}$  NMR (500 MHz) and  $^{13}\text{C}$  NMR (126 MHz) spectra of 3-(4-azido-3,5-diisopropylphenyl)-5-(4-(azidomethyl)phenyl)benzyl alcohol (**S10**) ( $\text{CDCl}_3$ )

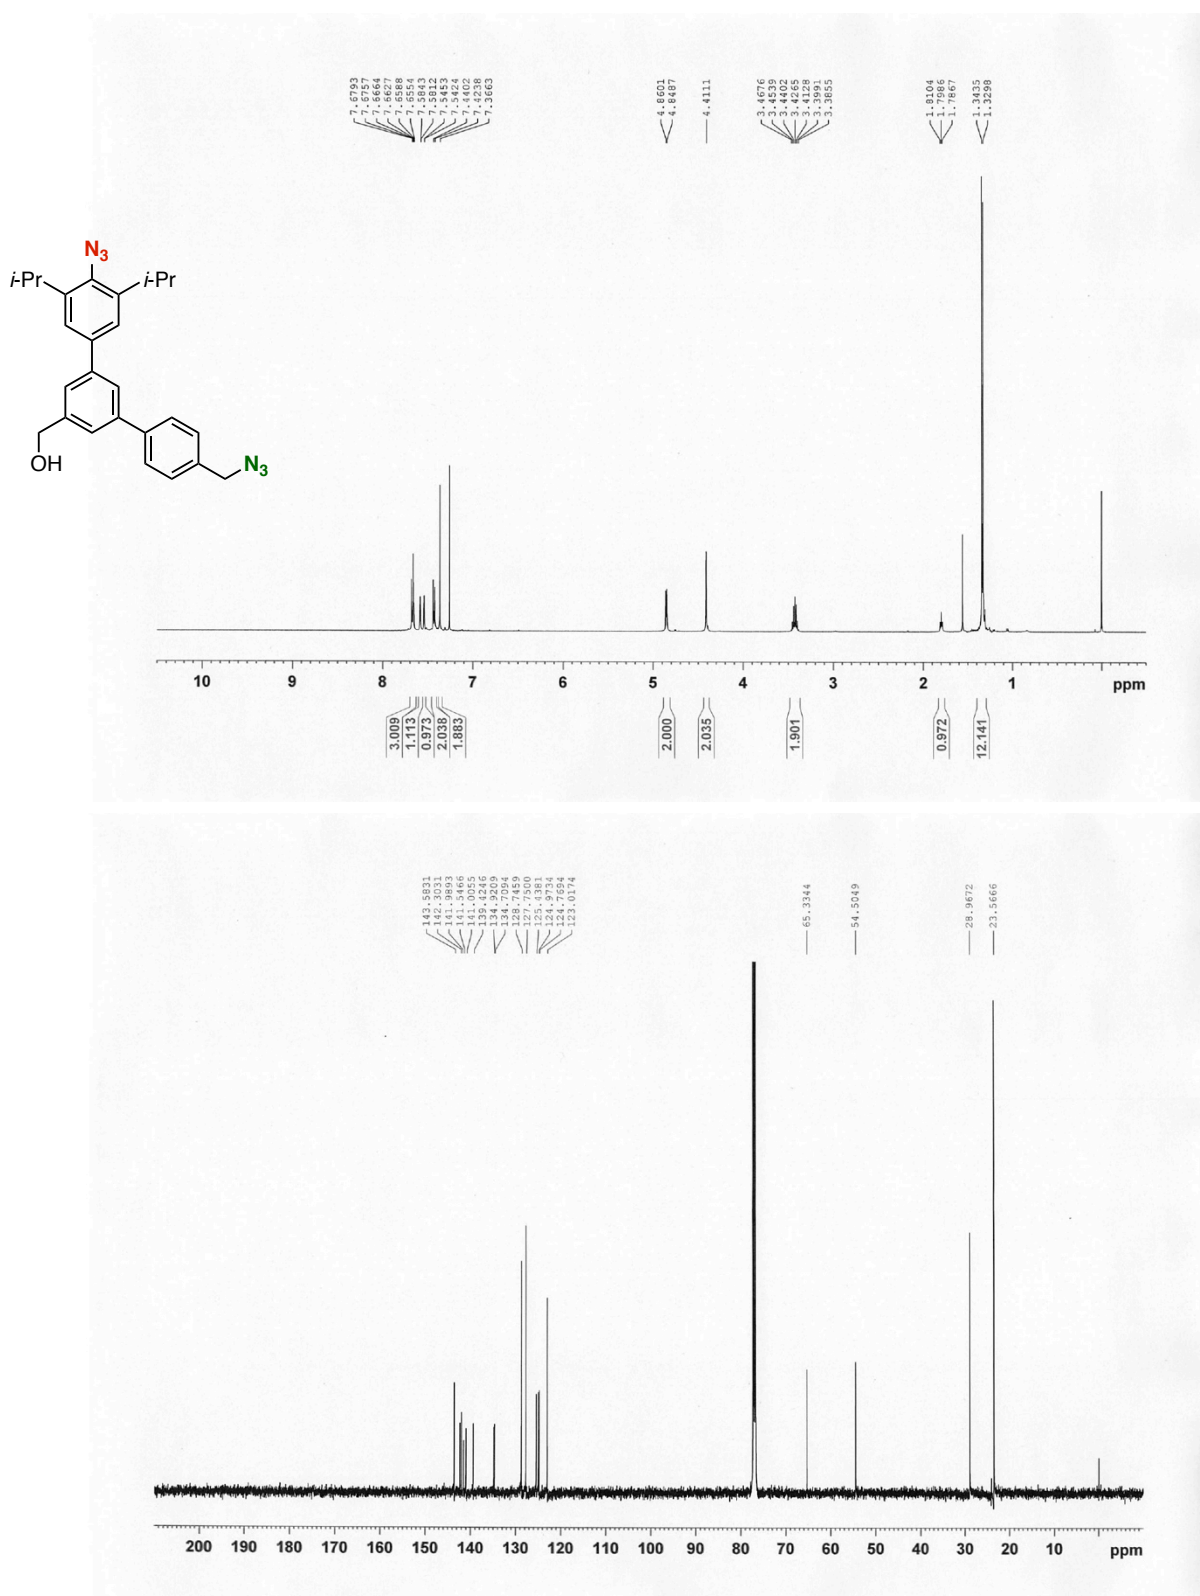



$^1\text{H}$  NMR (500 MHz) and  $^{13}\text{C}$  NMR (126 MHz) spectra of *N*-(3-(4-azido-3,5-diisopropylphenyl)-5-(4-(azidomethyl)phenyl)benzyl)phthalimide (**S11**) ( $\text{CDCl}_3$ )

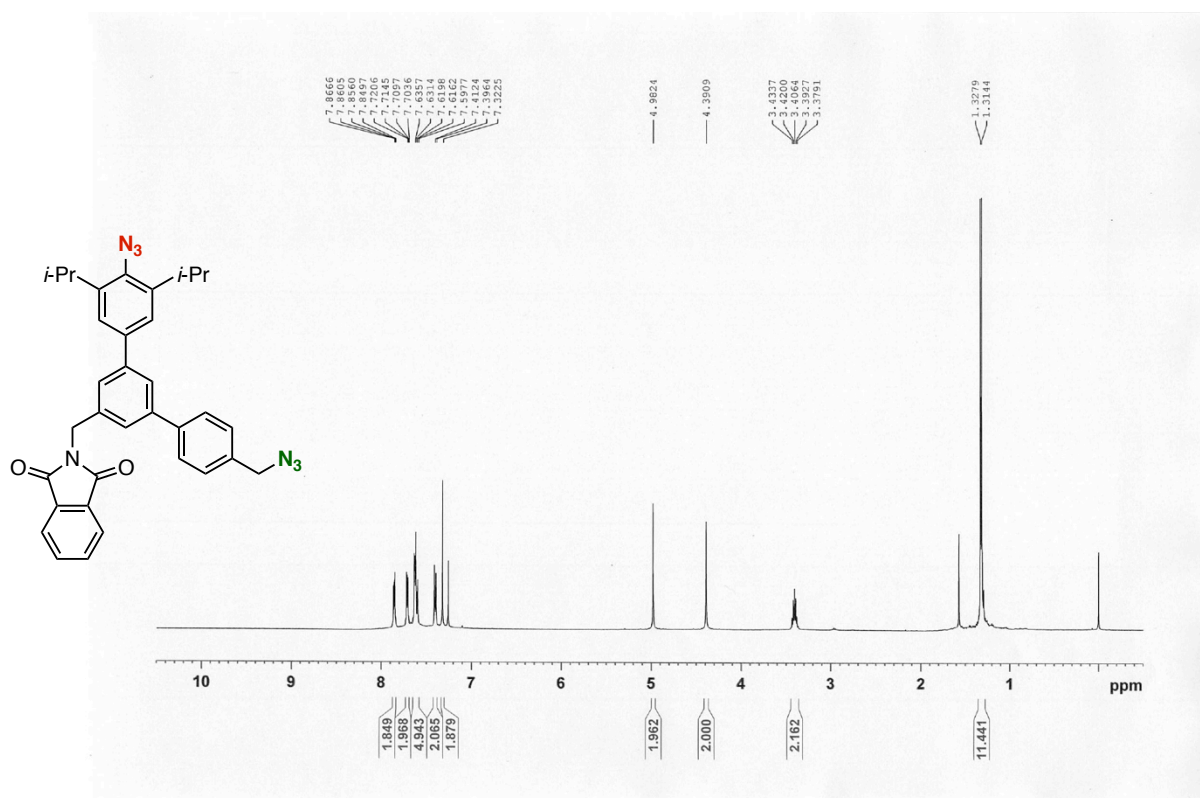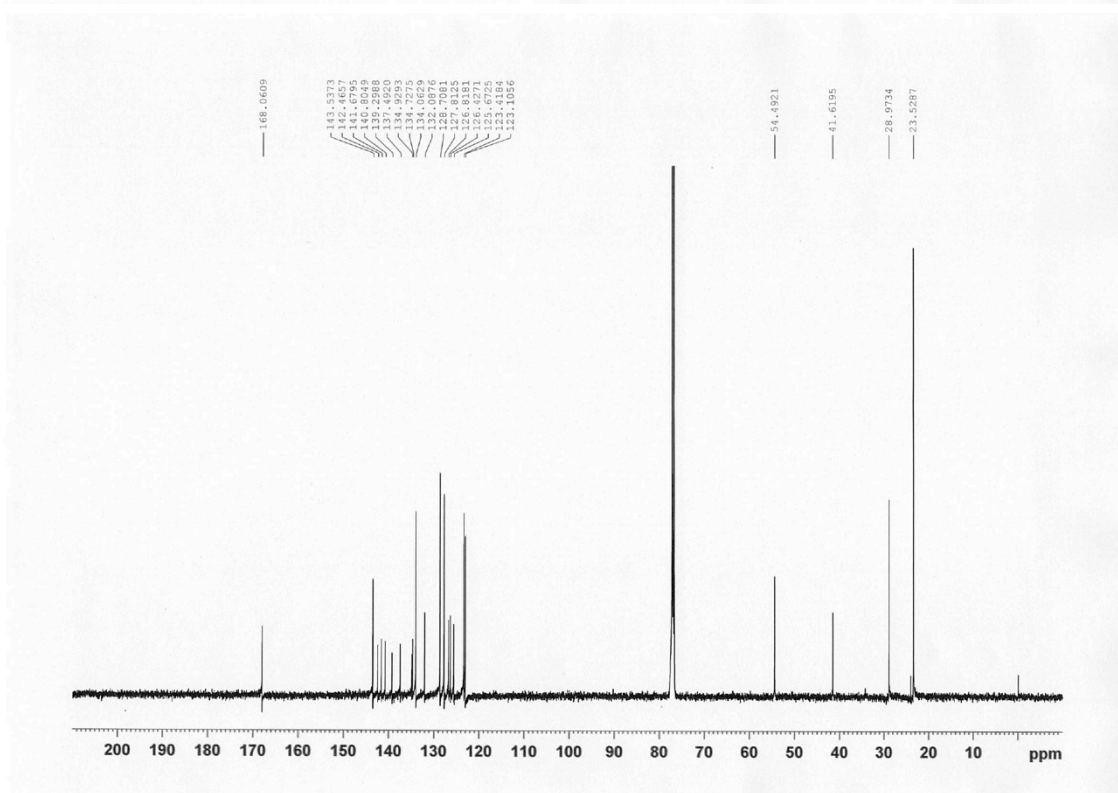

$^1\text{H}$  NMR (500 MHz) and  $^{13}\text{C}$  NMR (126 MHz) spectra of 3-azido-*N*-(3-(4-azido-3,5-diisopropylphenyl)-5-(4-(azidomethyl)phenyl)benzyl)-1-adamantanamide (**16**) ( $\text{CDCl}_3$ )

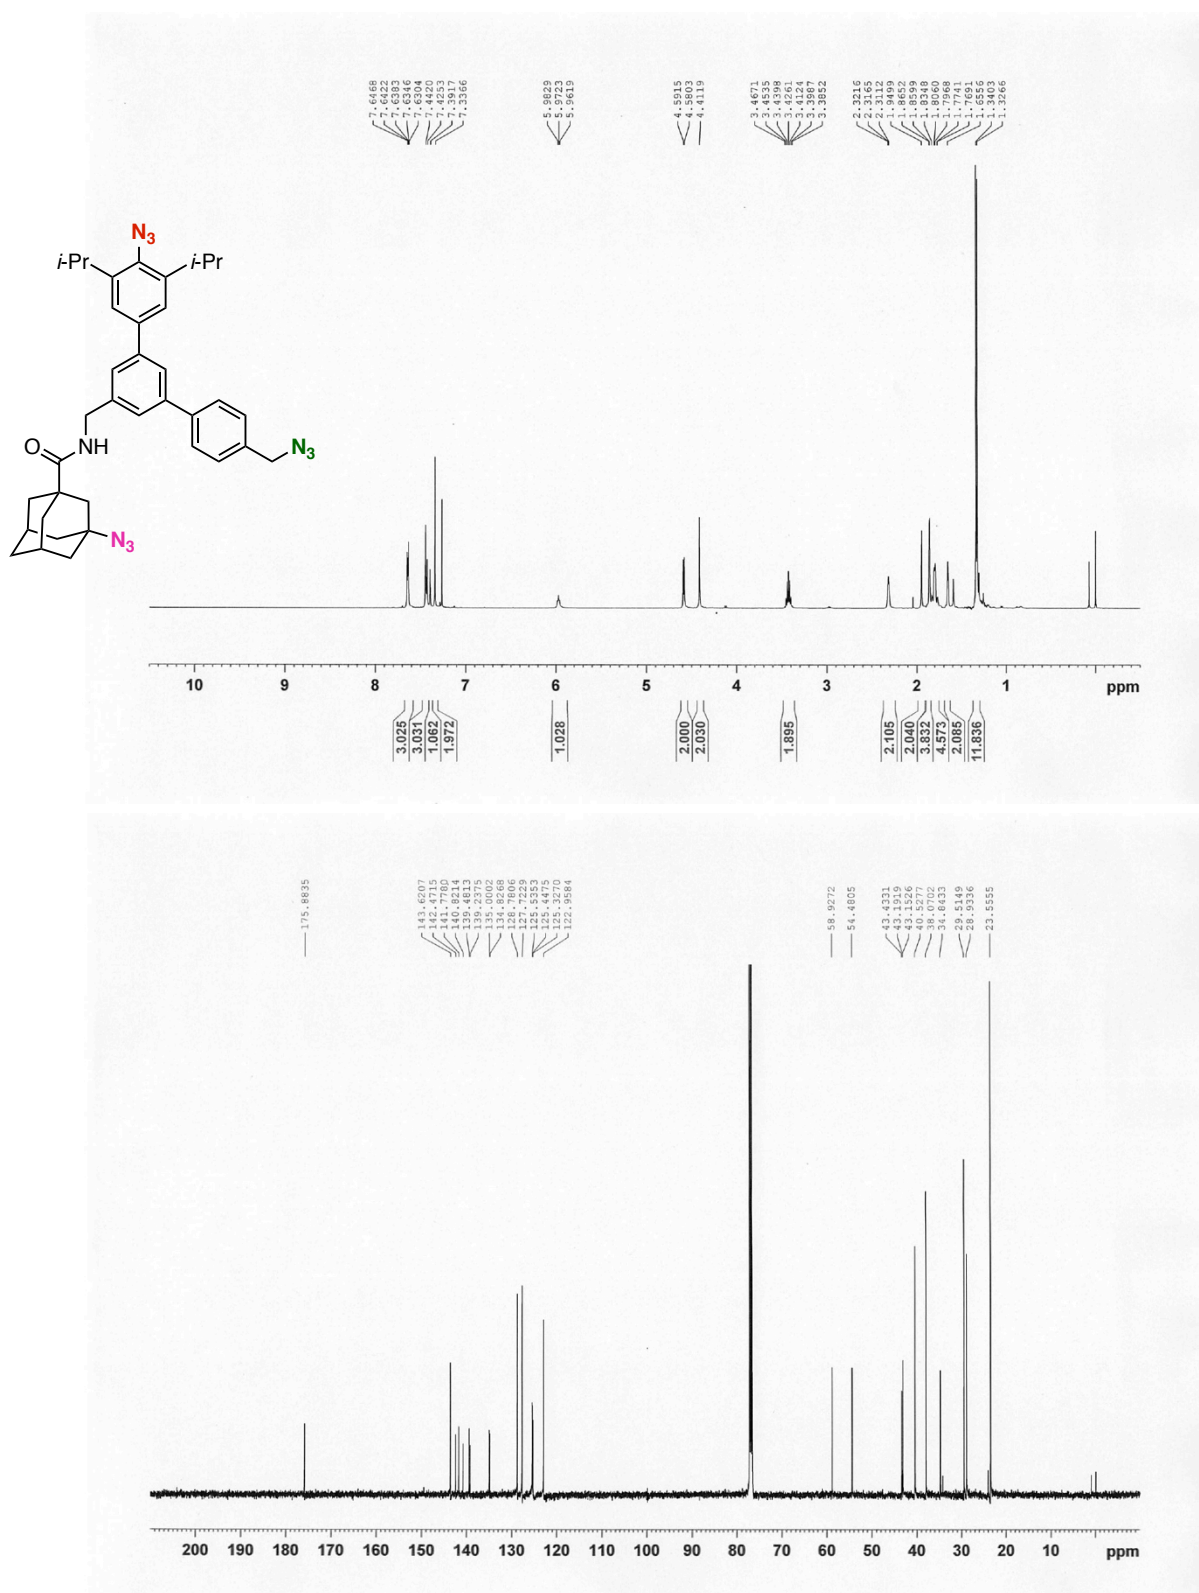

$^1\text{H}$  NMR (500 MHz) and  $^{13}\text{C}$  NMR (126 MHz) spectra of 3-azido-*N*-(3-(4-azido-3,5-diisopropylphenyl)-5-(4-((5-phenyl-1*H*-1,2,3-triazol-1-yl)methyl)phenyl)benzyl)-1-adamantanamide (**S12**) ( $\text{CDCl}_3$ )

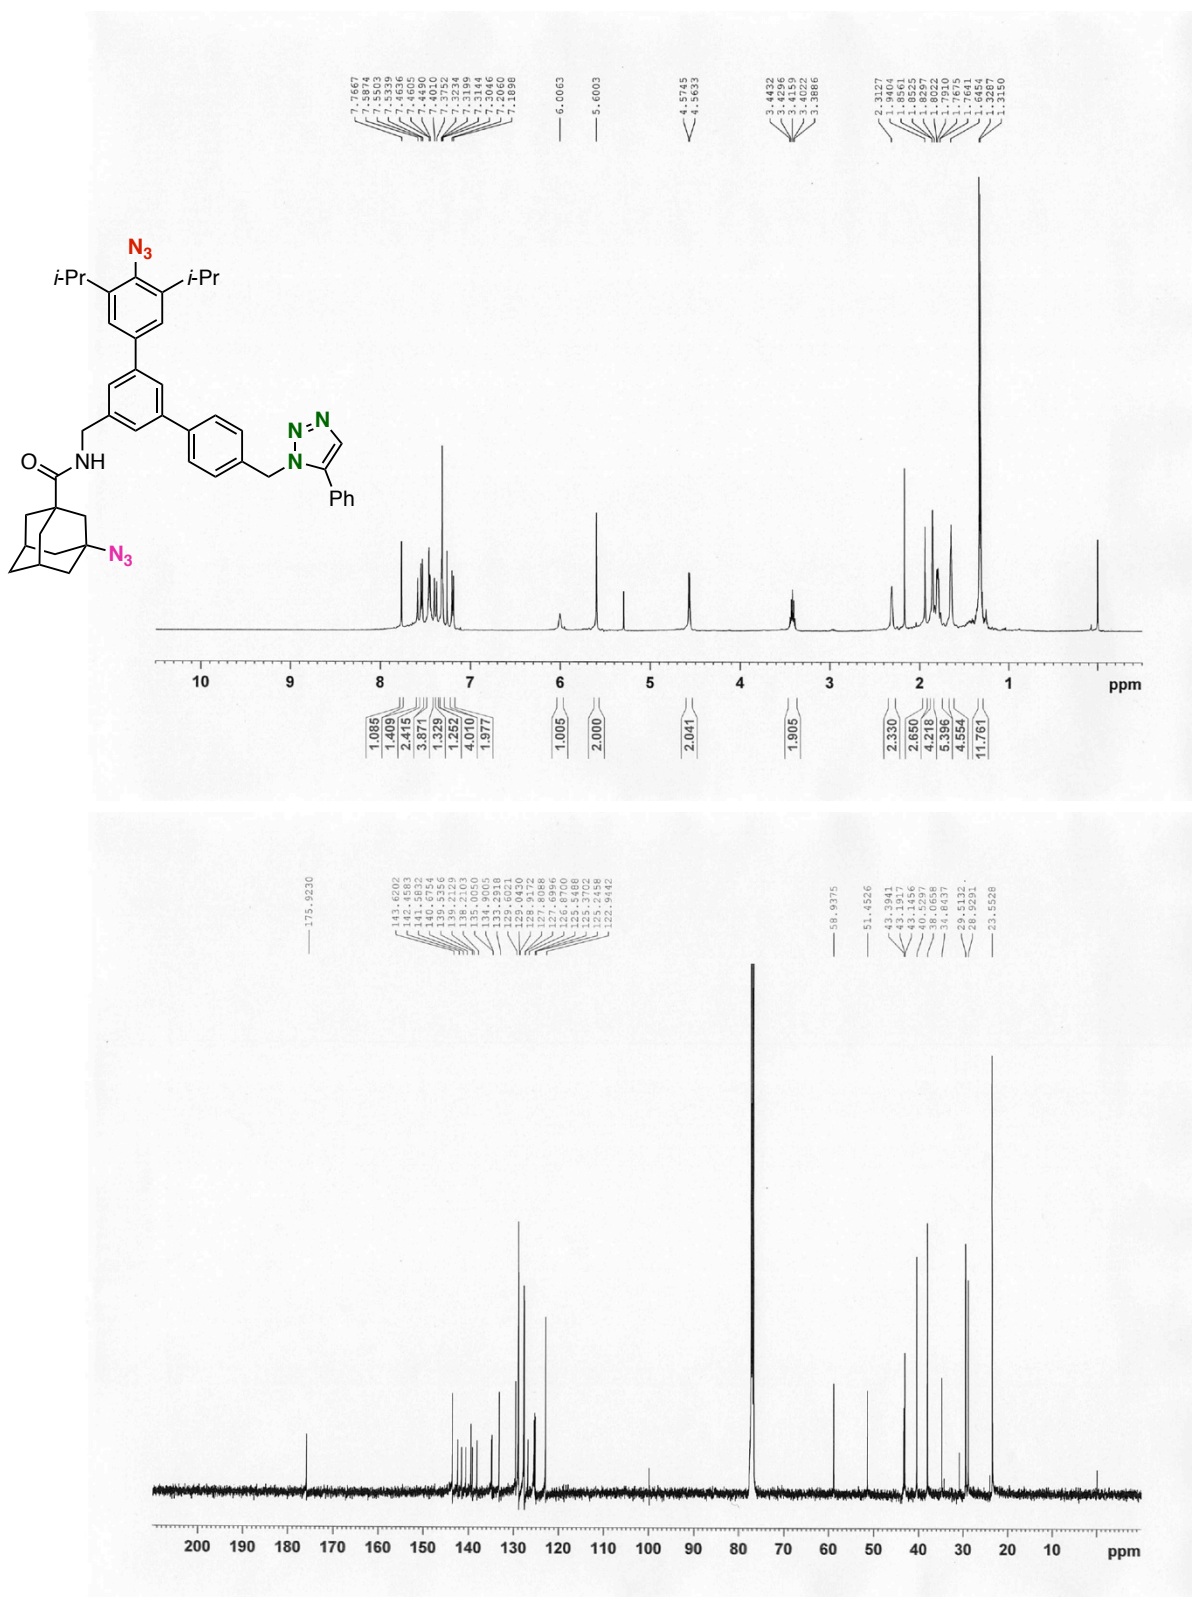



$^1\text{H}$  NMR (500 MHz) and  $^{13}\text{C}$  NMR (126 MHz) spectra of 3-azido-*N*-(3-(4-(8,9-dihydro-1*H*-dibenzo[3,4:7,8]cycloocta[1,2-*d*][1,2,3]triazol-1-yl)-3,5-diisopropylphenyl)-5-(4-((5-phenyl-1*H*-1,2,3-triazol-1-yl)methyl)phenyl)benzyl)-1-adamantanamide (**S13**) ( $\text{CDCl}_3$ )

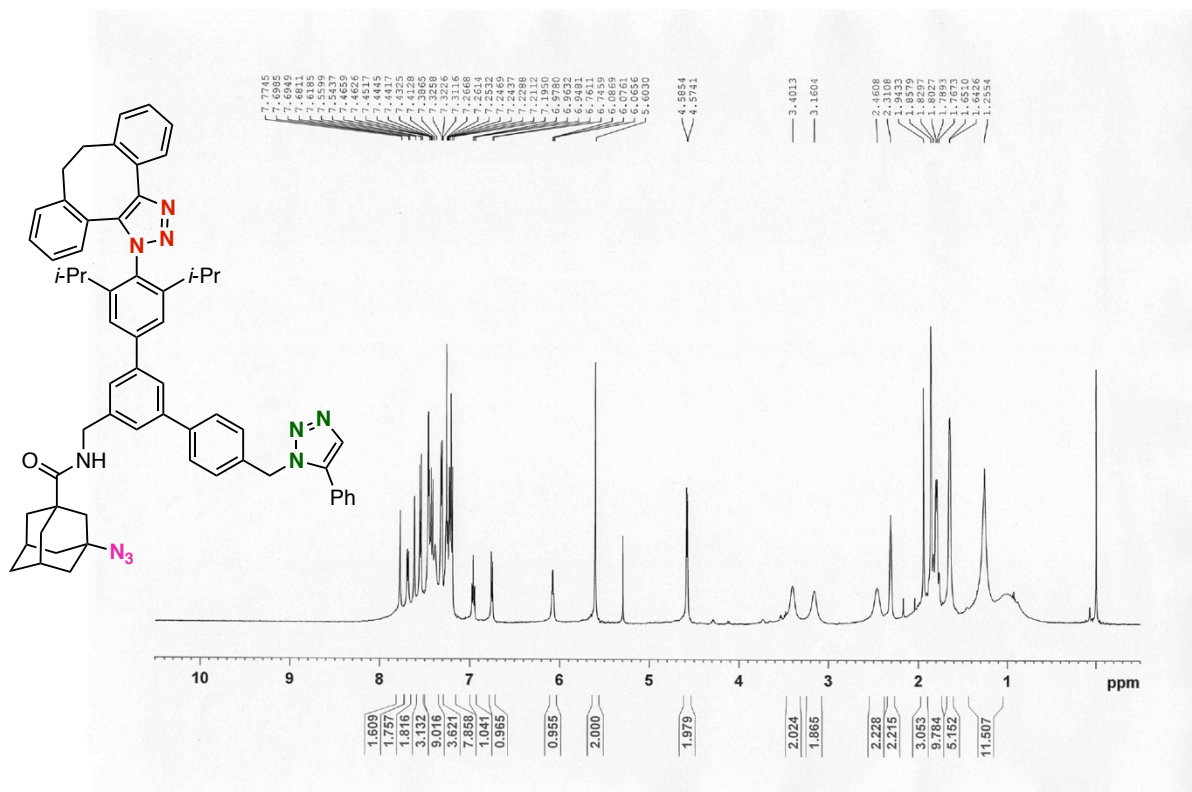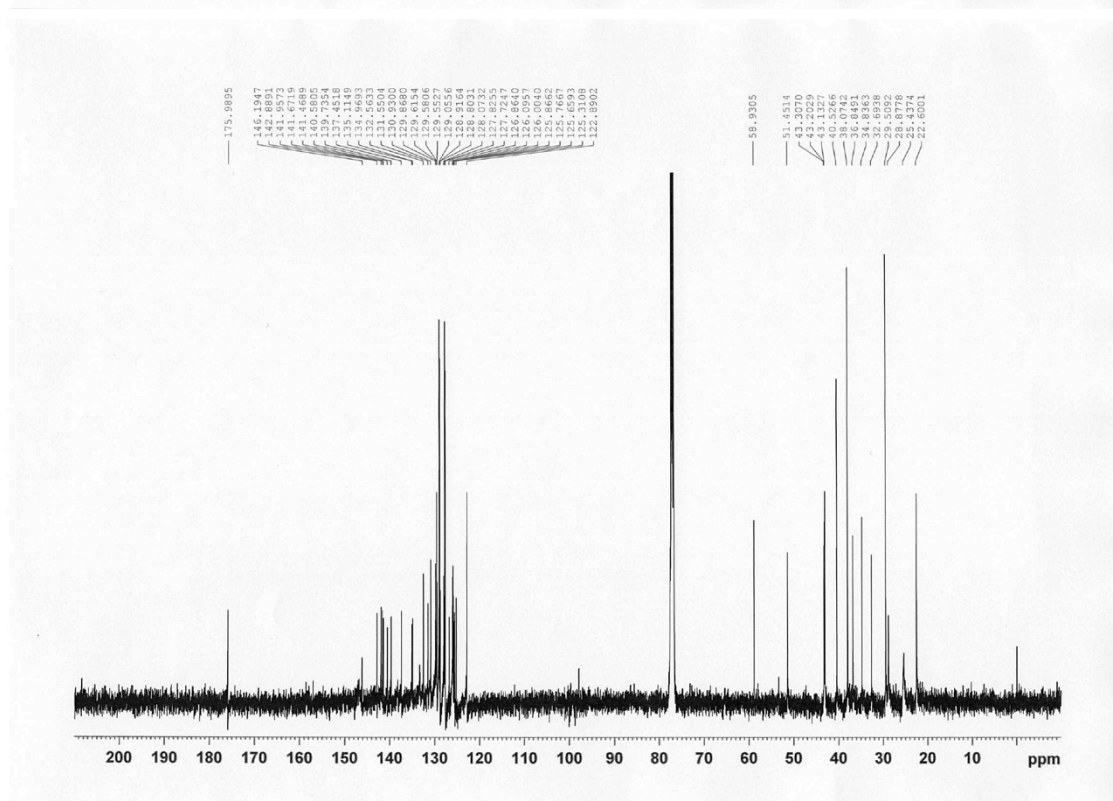

$^1\text{H}$  NMR (500 MHz) spectrum of 3-(4-((((((1*R*\*,8*S*\*,9*R*\*)-bicyclo[6.1.0]non-4-yn-9-yl)methyl)oxycarbonylamino)ethoxy)ethoxy)methyl)-1*H*-1,2,3-triazol-1-yl)-*N*-(3-(4-(8,9-dihydro-1*H*-dibenzo[3,4:7,8]cycloocta[1,2-*d*][1,2,3]triazol-1-yl)-3,5-diisopropylphenyl)-5-(4-((5-phenyl-1*H*-1,2,3-triazol-1-yl)methyl)phenyl)benzyl)-1-adamantanamide (**18**) ( $\text{CDCl}_3$ )

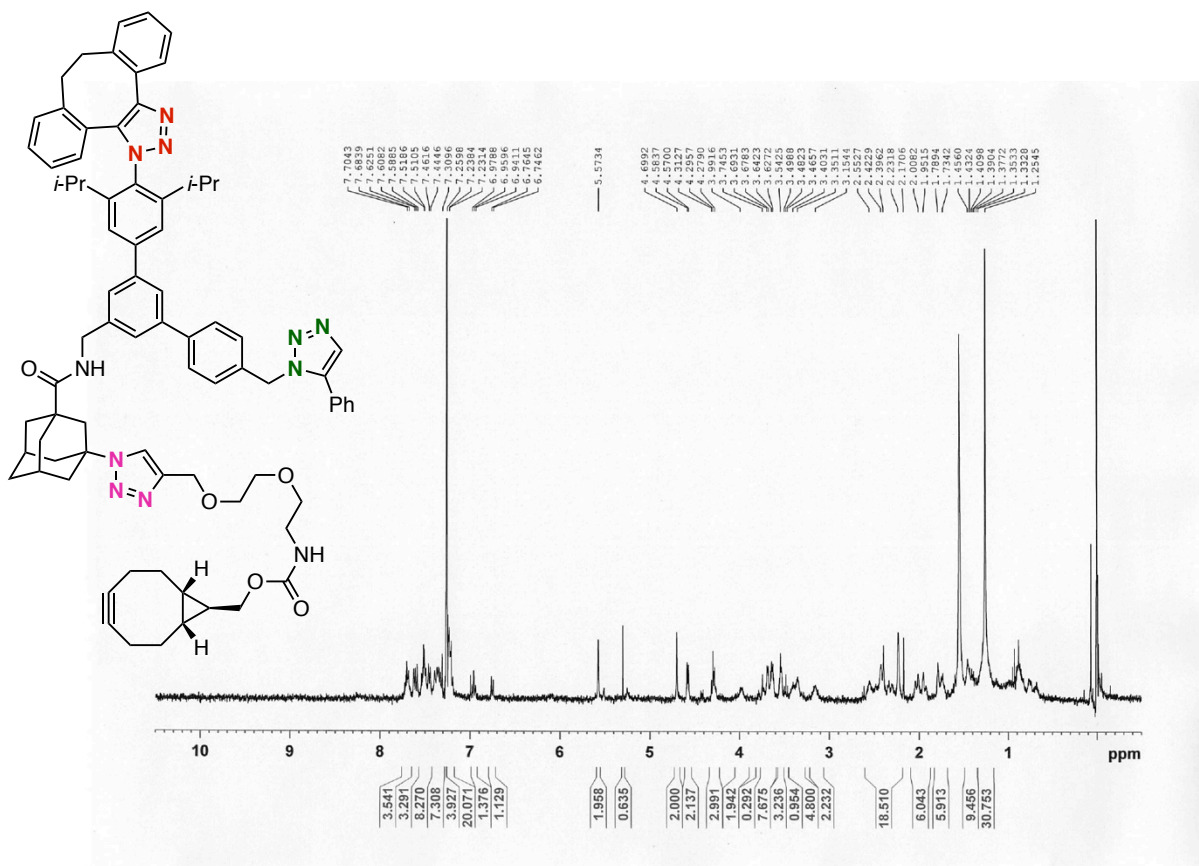

$^1\text{H}$  NMR (500 MHz) and  $^{13}\text{C}$  NMR (126 MHz) spectra of (3-azido-5-(azidomethyl)phenyl)boronic acid (**S8**) ( $\text{CDCl}_3$ )

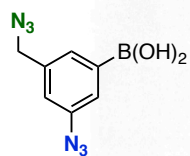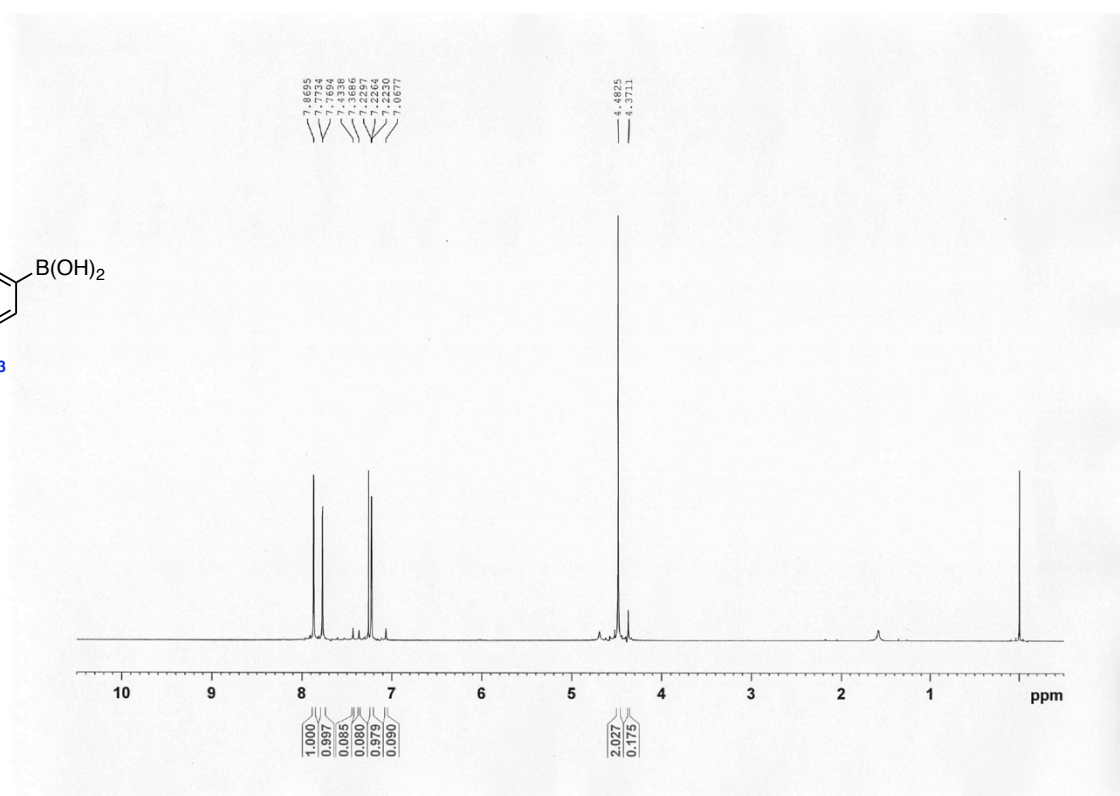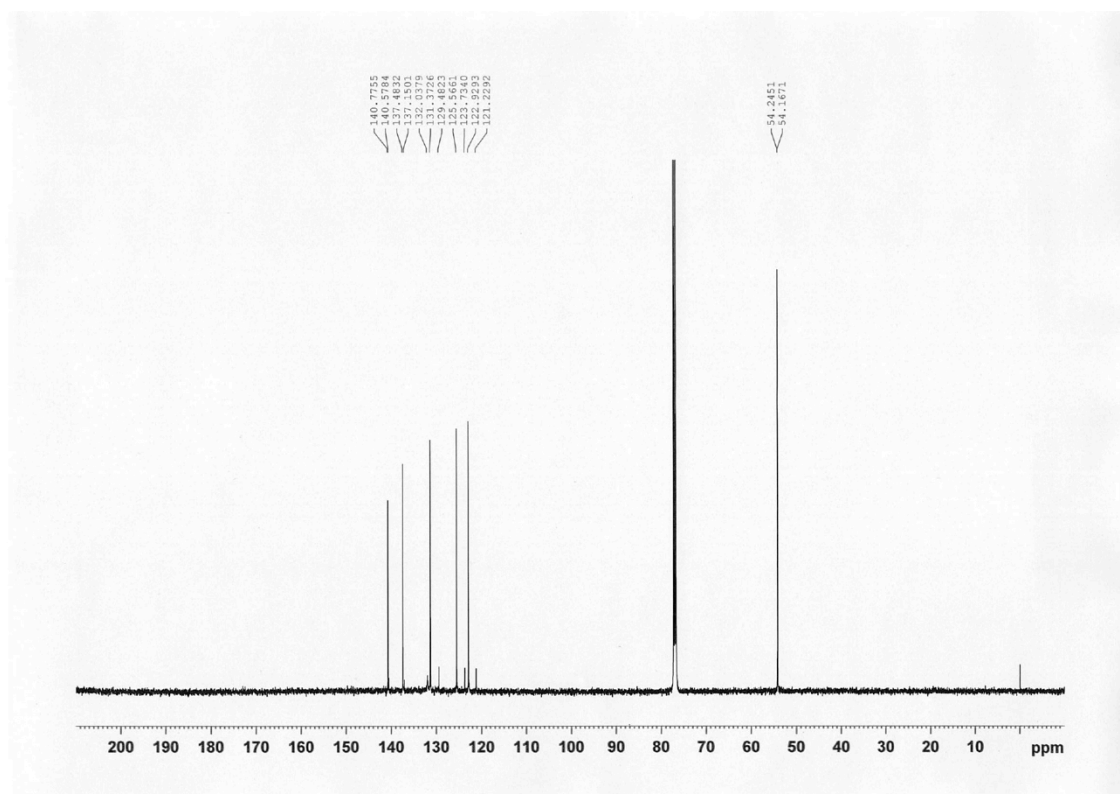

$^1\text{H}$  NMR (500 MHz) and  $^{13}\text{C}$  NMR (126 MHz) spectra of methyl 3-(3-azido-5-(azidomethyl)phenyl)-5-bromobenzoate (**S15**) ( $\text{CDCl}_3$ )

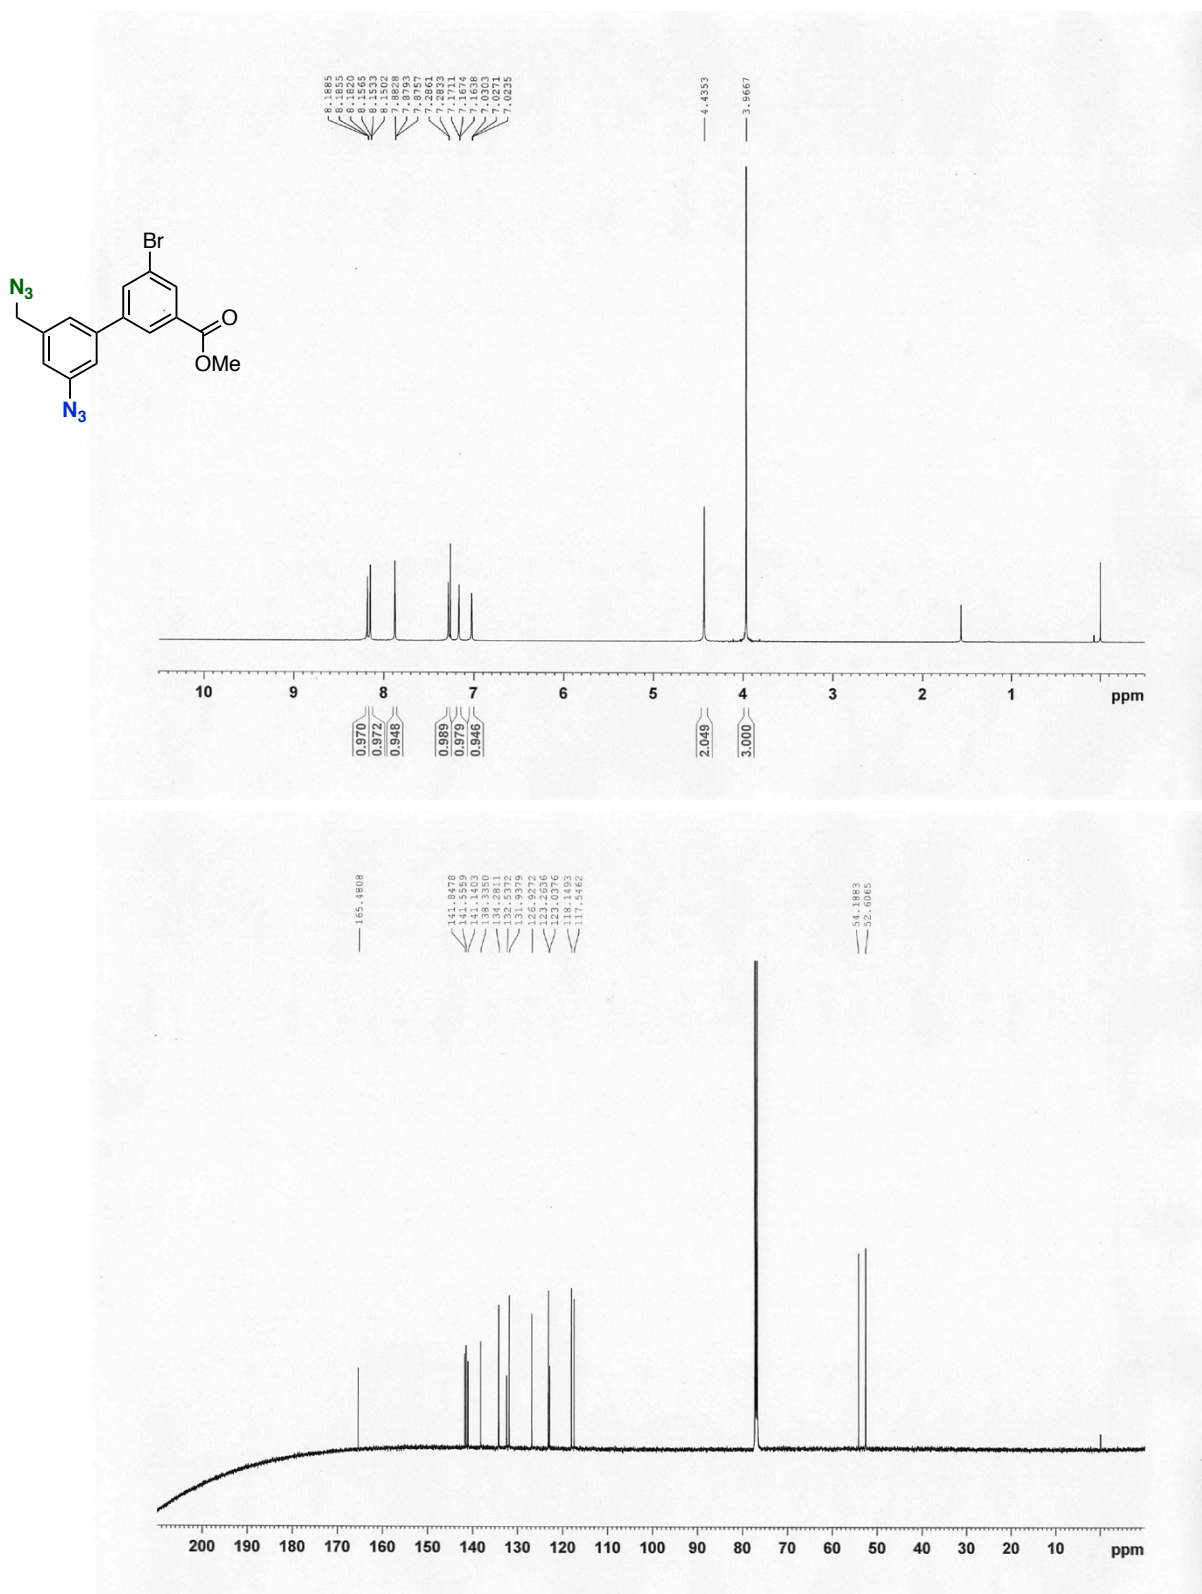



<sup>1</sup>H NMR (500 MHz) and <sup>13</sup>C NMR (126 MHz) spectra of methyl 3-(3-azido-5-(azidomethyl)phenyl)-5-(4-azido-3,5-diisopropylphenyl)benzoate (**S16**) (CDCl<sub>3</sub>)

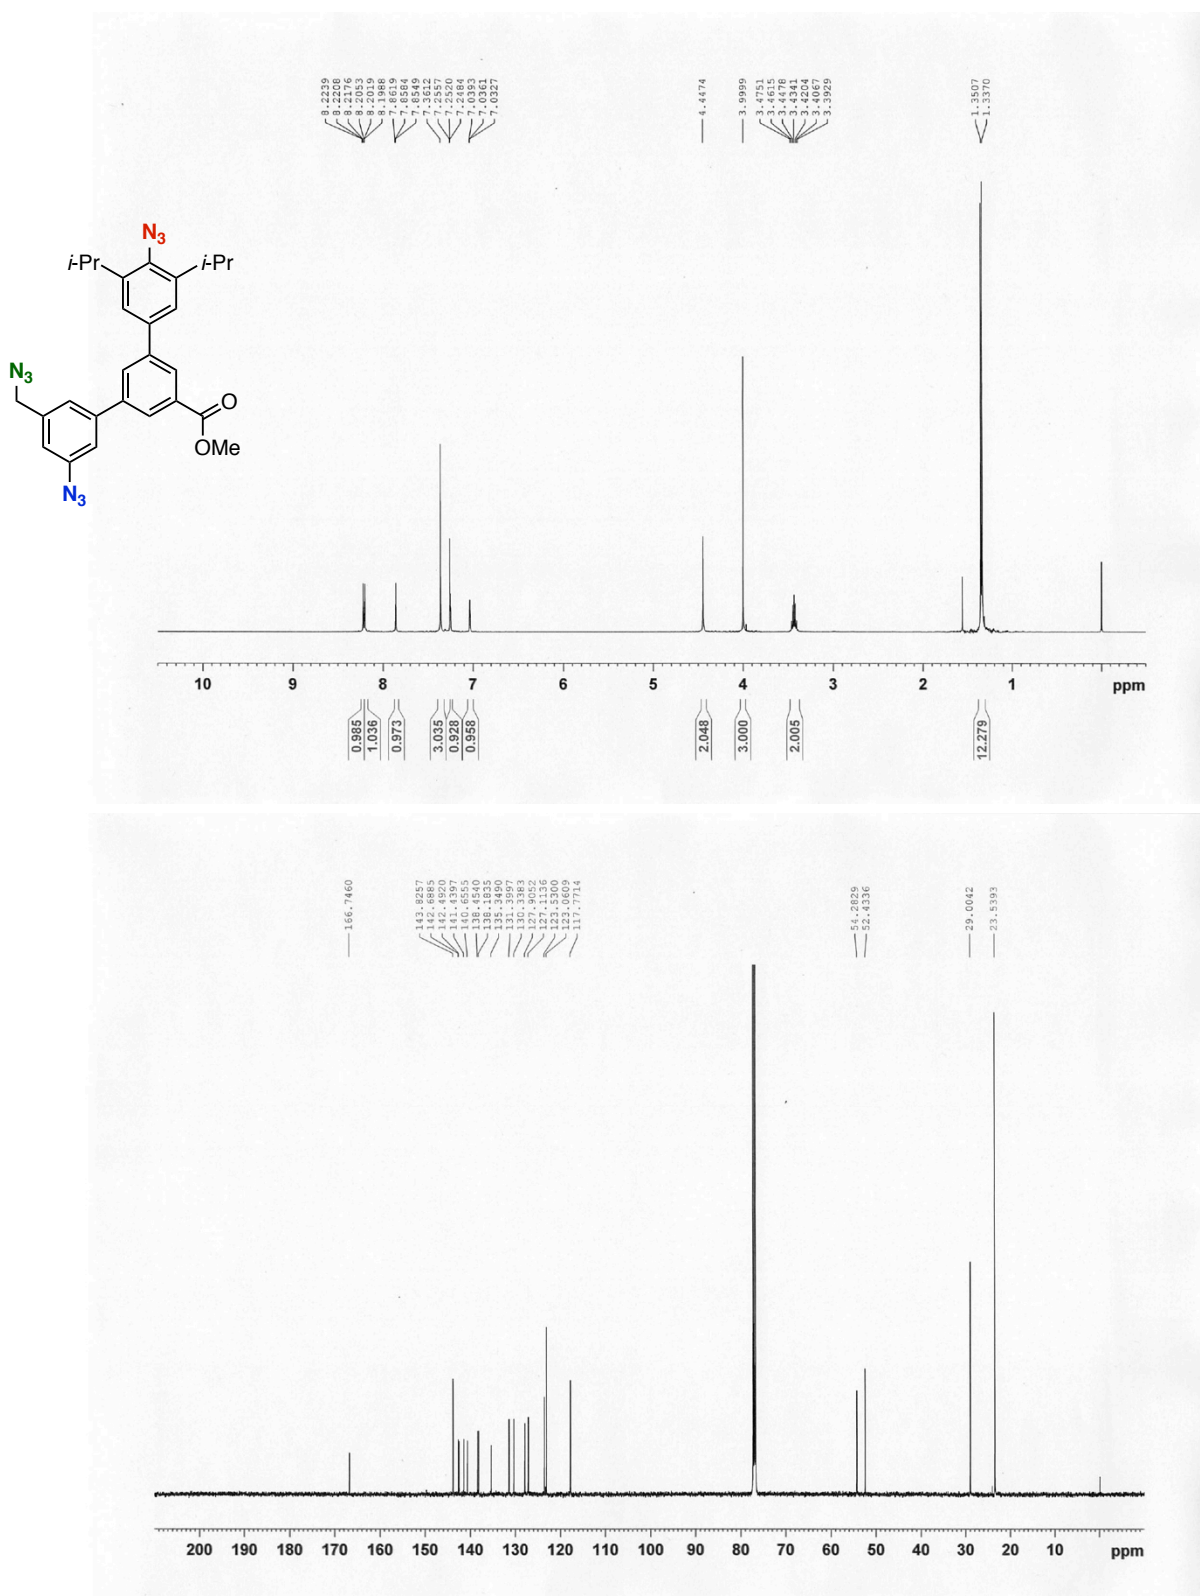



$^1\text{H}$  NMR (500 MHz) and  $^{13}\text{C}$  NMR (126 MHz) spectra of 3-(3-azido-5-(azidomethyl)phenyl)-5-(4-azido-3,5-diisopropylphenyl)benzyl alcohol (**S17**) ( $\text{CDCl}_3$ )

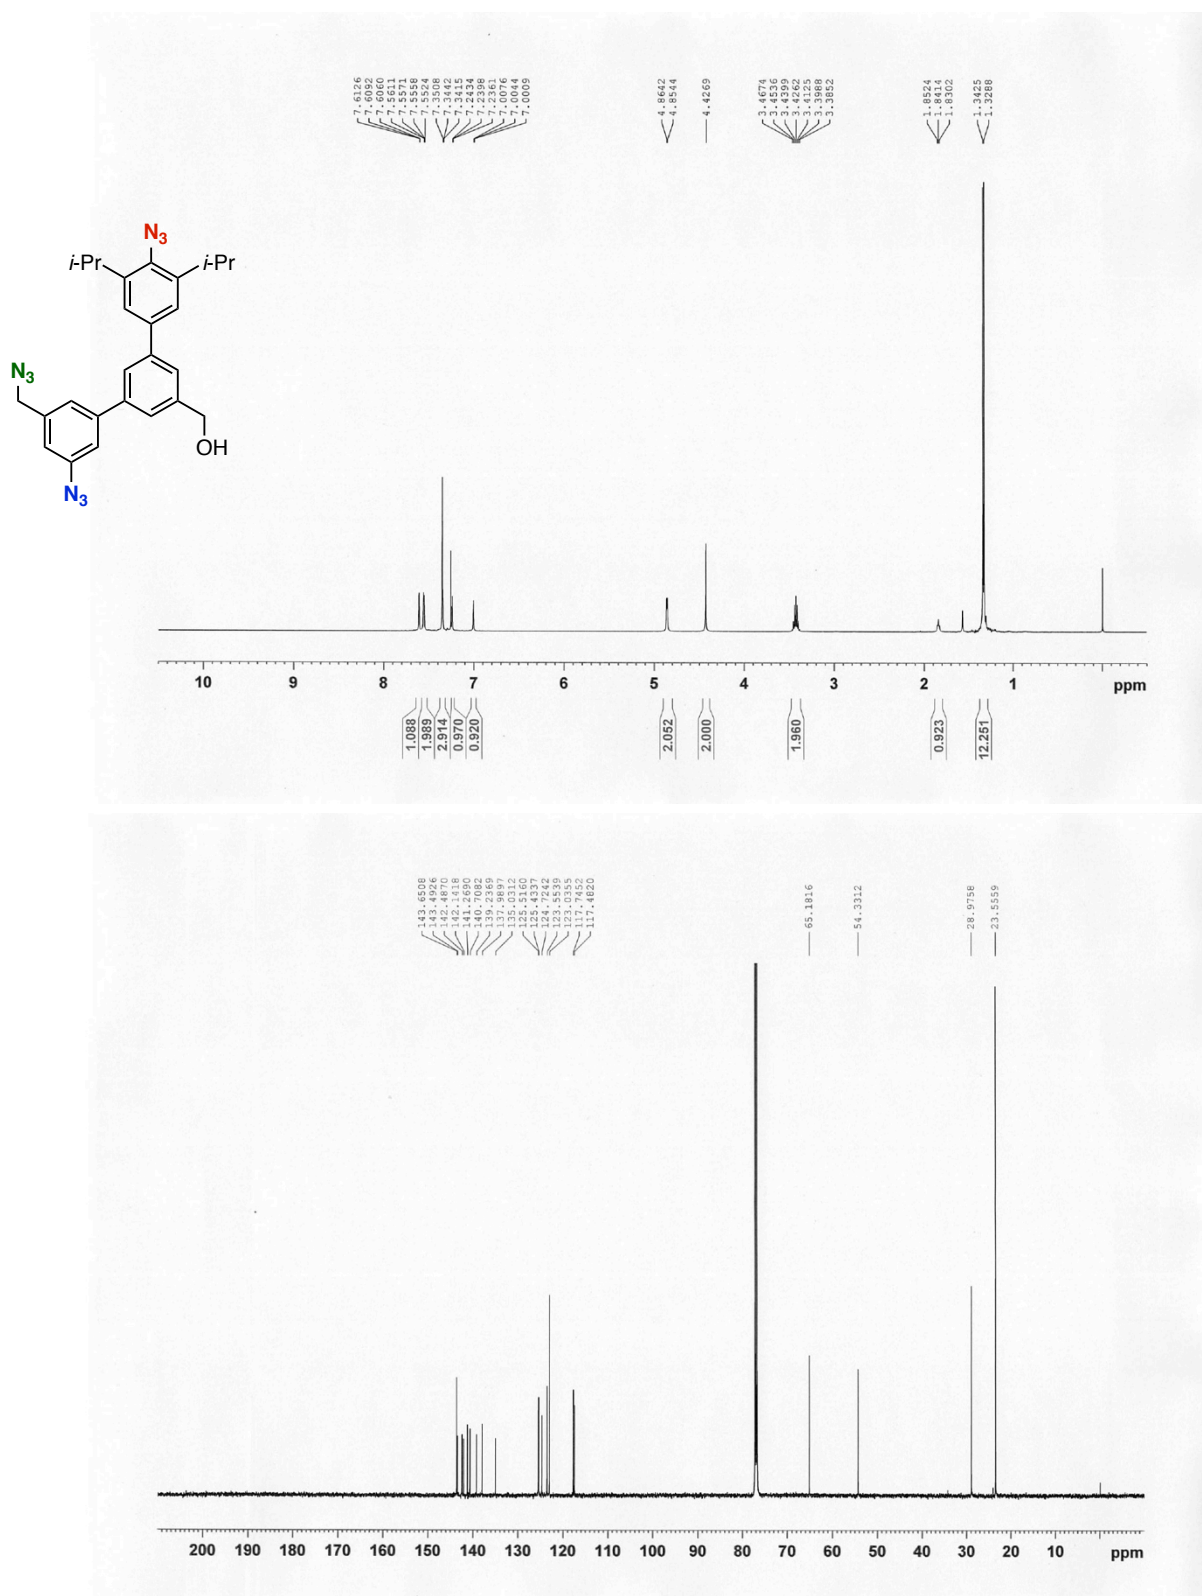

$^1\text{H}$  NMR (500 MHz) and  $^{13}\text{C}$  NMR (126 MHz) spectra of *N*-(3-(3-azido-5-(azidomethyl)phenyl)-5-(4-azido-3,5-diisopropylphenyl)benzyl)phthalimide (**S18**) ( $\text{CDCl}_3$ )

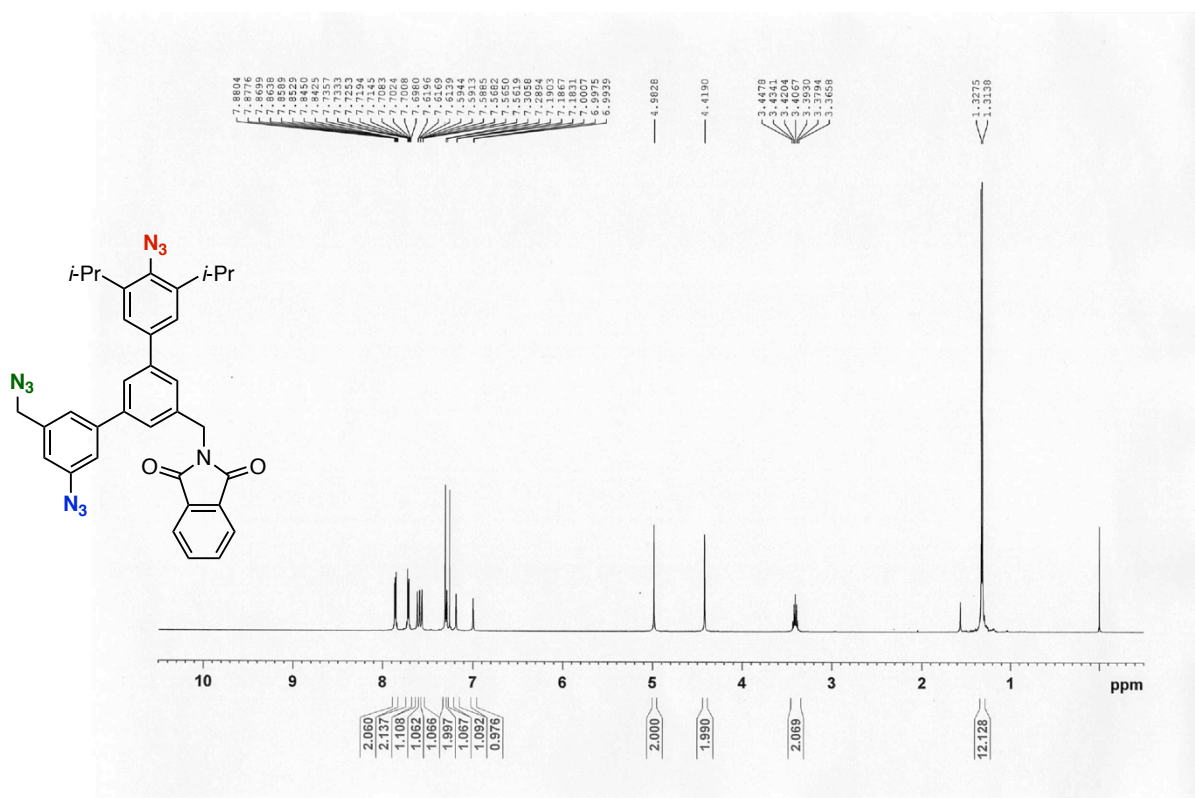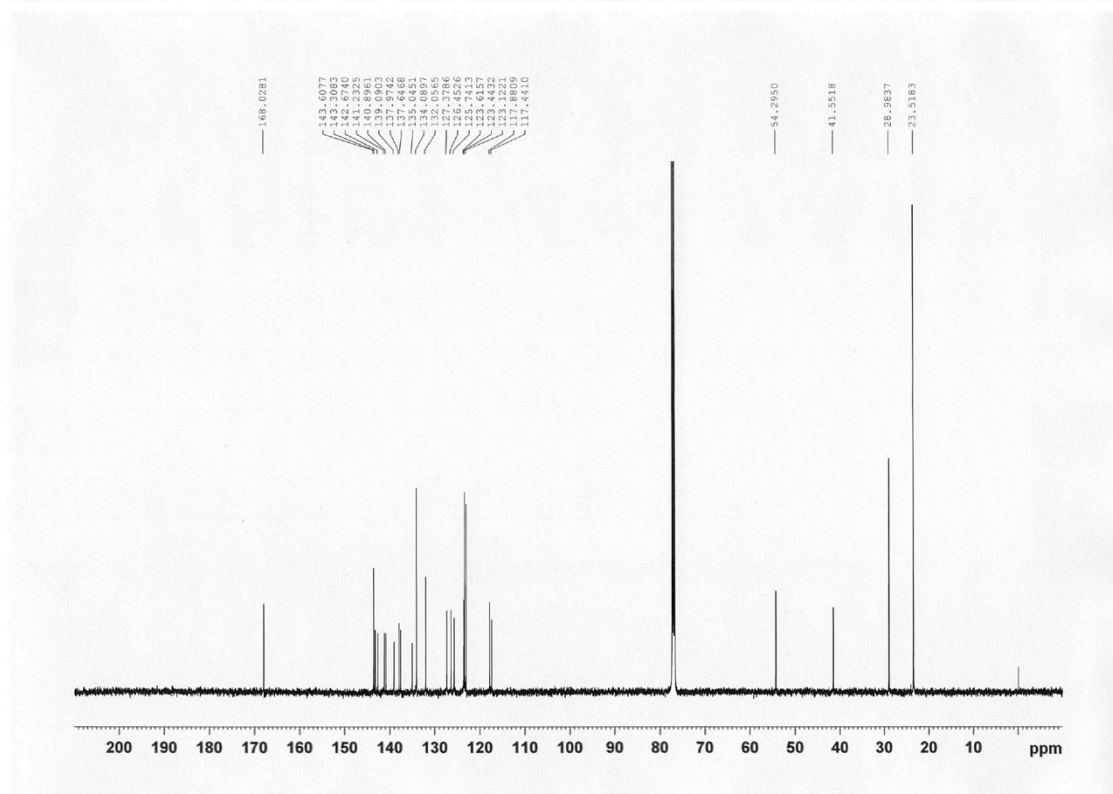

$^1\text{H}$  NMR (500 MHz) and  $^{13}\text{C}$  NMR (126 MHz) spectra of 3-(3-azido-5-(azidomethyl)phenyl)-5-(4-azido-3,5-diisopropylphenyl)benzylamine (**S19**) ( $\text{CDCl}_3$ )

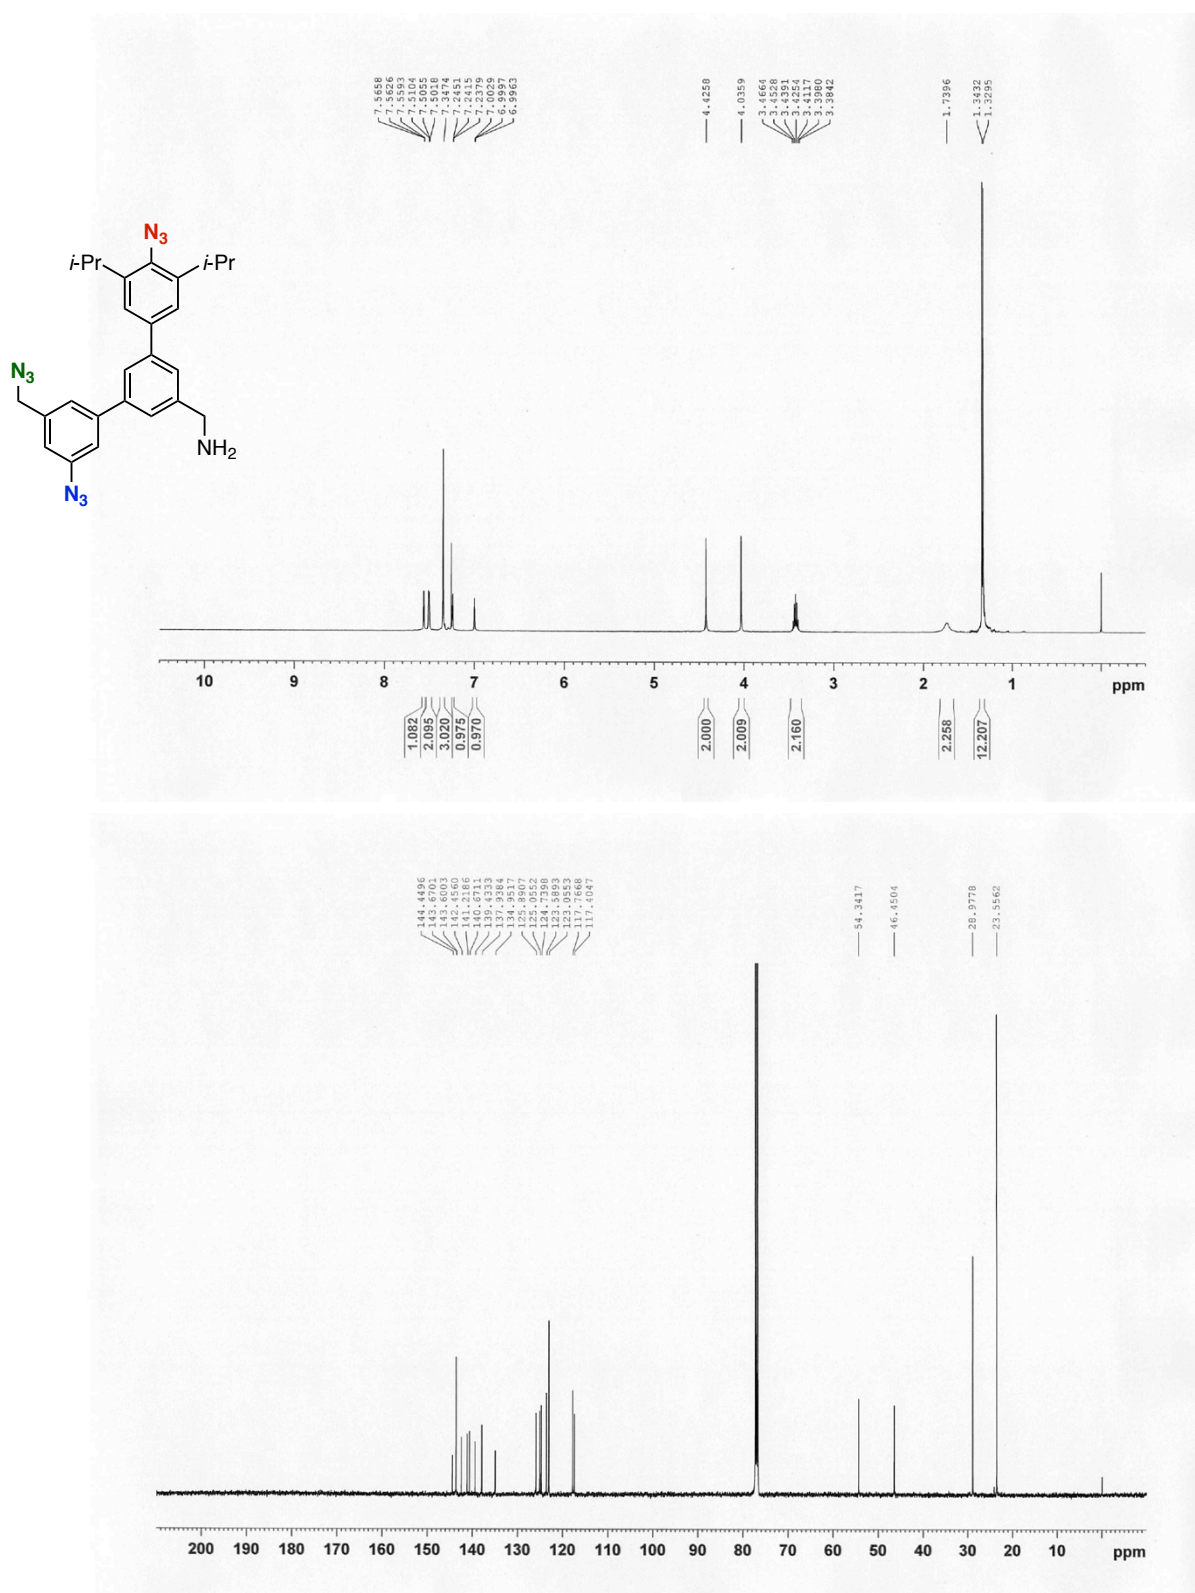



$^1\text{H}$  NMR (500 MHz) and  $^{13}\text{C}$  NMR (126 MHz) spectra of 3-azido-*N*-(3-(3-azido-5-(azidomethyl)phenyl)-5-(4-azido-3,5-diisopropylphenyl)benzyl)adamantane-1-carboxamide (**19**) ( $\text{CDCl}_3$ )

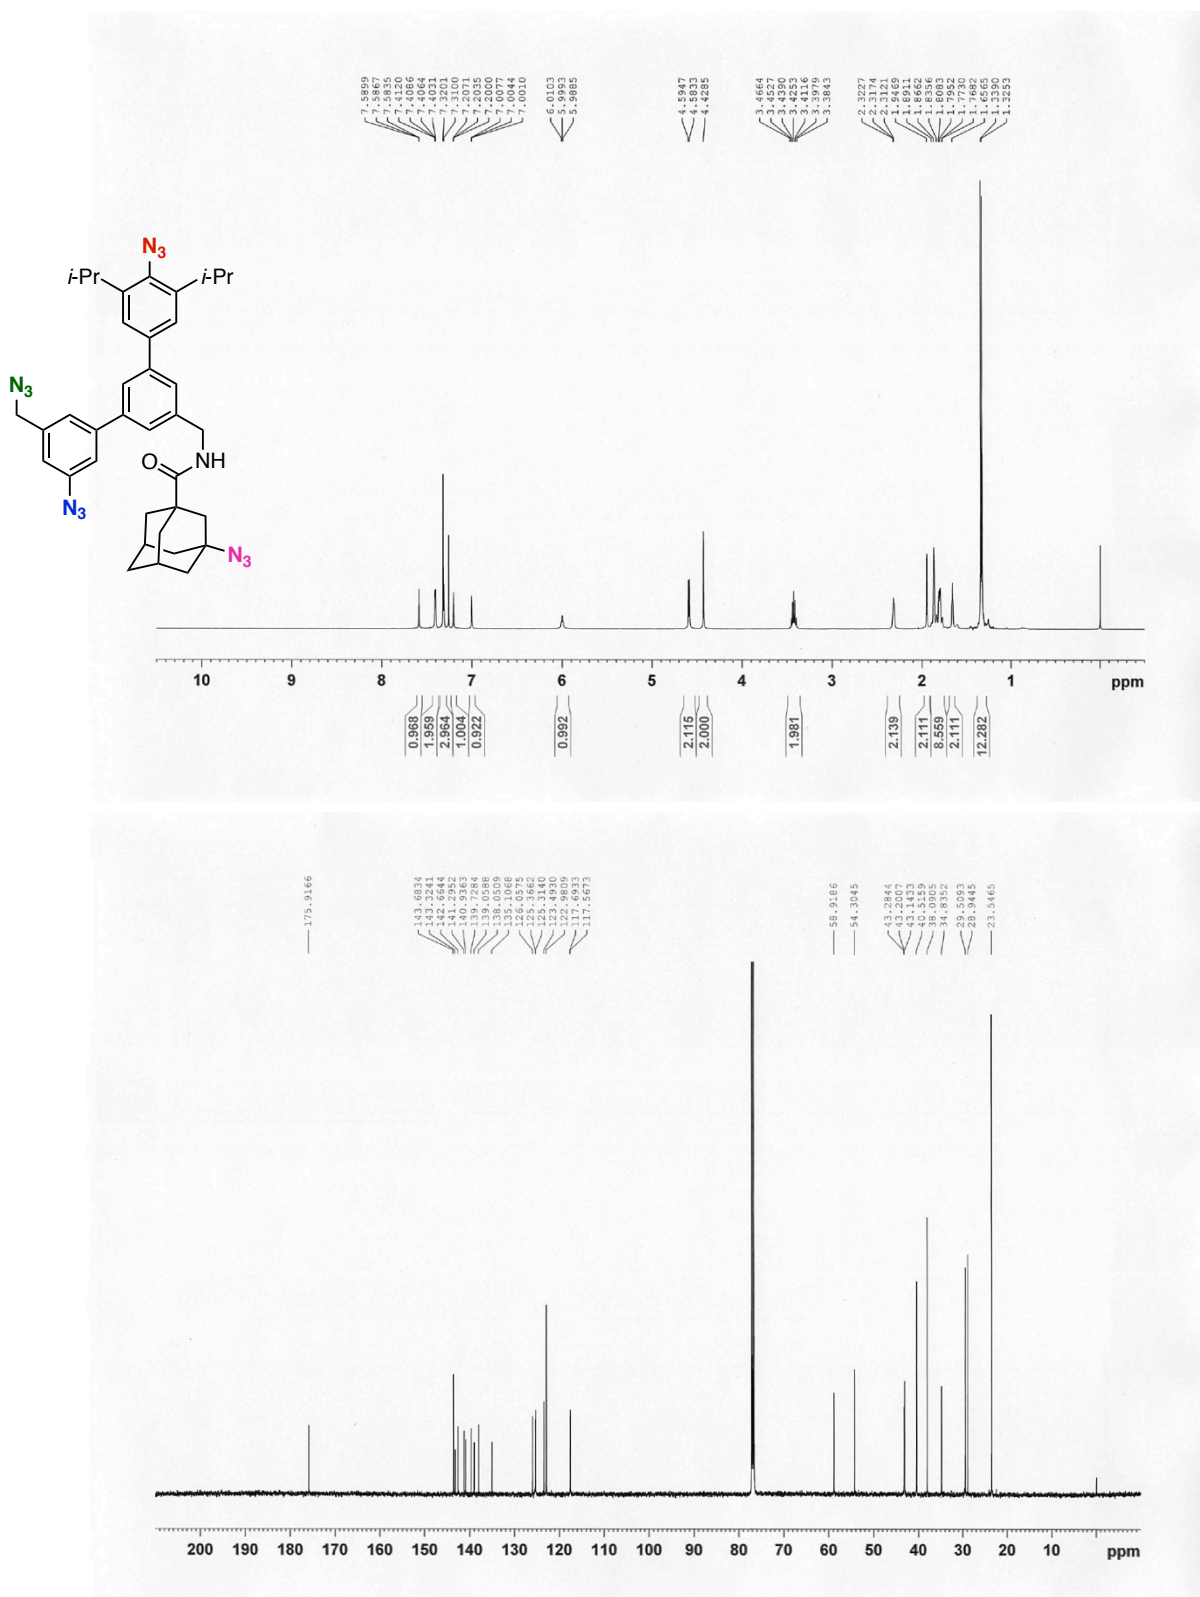

$^1\text{H}$  NMR (500 MHz) and  $^{13}\text{C}$  NMR (126 MHz) spectra of *N*-(3-(3-(4-acetyl-5-methyl-1*H*-1,2,3-triazol-1-yl)-3-azido-5-(azidomethyl)phenyl)-5-(4-azido-3,5-diisopropylphenyl)benzyl)adamantane-1-carboxamide (**S20**) ( $\text{CDCl}_3$ )

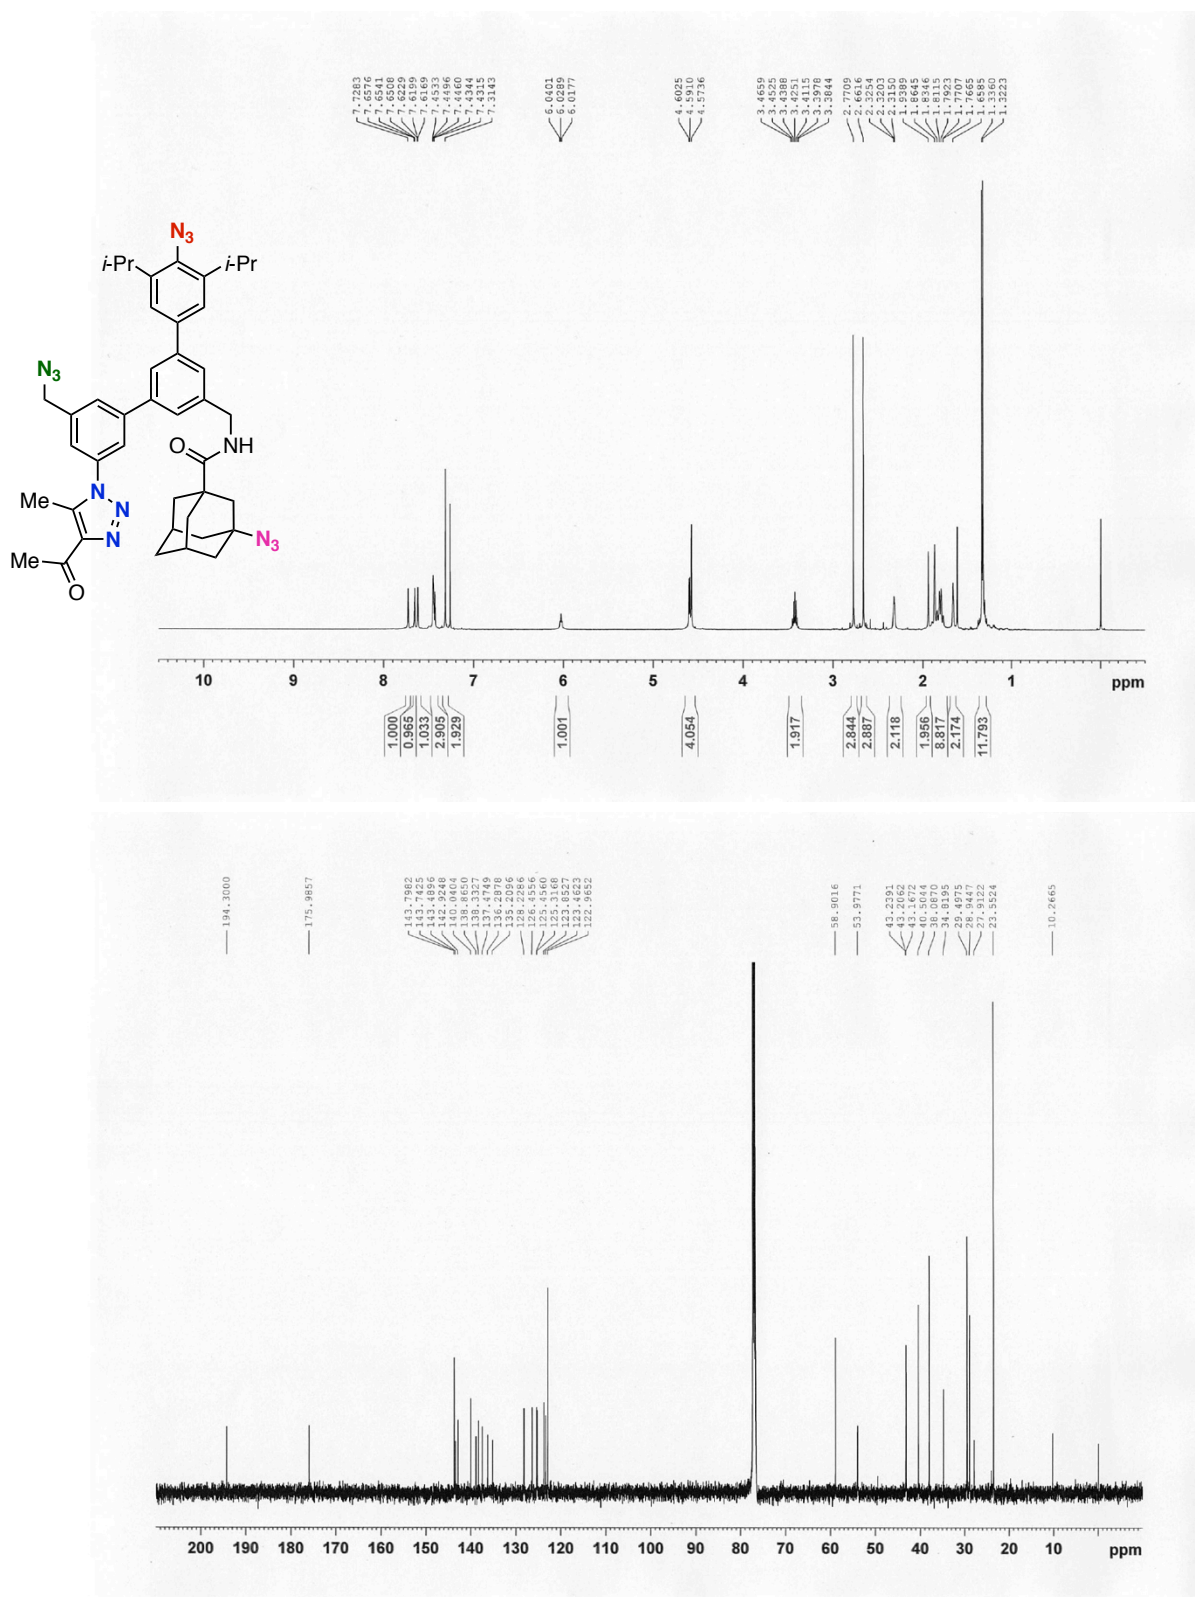

$^1\text{H}$  NMR (500 MHz) and  $^{13}\text{C}$  NMR (126 MHz) spectra of 3-azido-*N*-(3-(3-(4-acetyl-5-methyl-1*H*-1,2,3-triazol-1-yl)-5-((5-(2-hydroxypropan-2-yl)-1*H*-1,2,3-triazol-1-yl)methyl)phenyl)-5-(4-azido-3,5-diisopropylphenyl)benzyl)adamantane-1-carboxamide (**S21**) ( $\text{CDCl}_3$ )

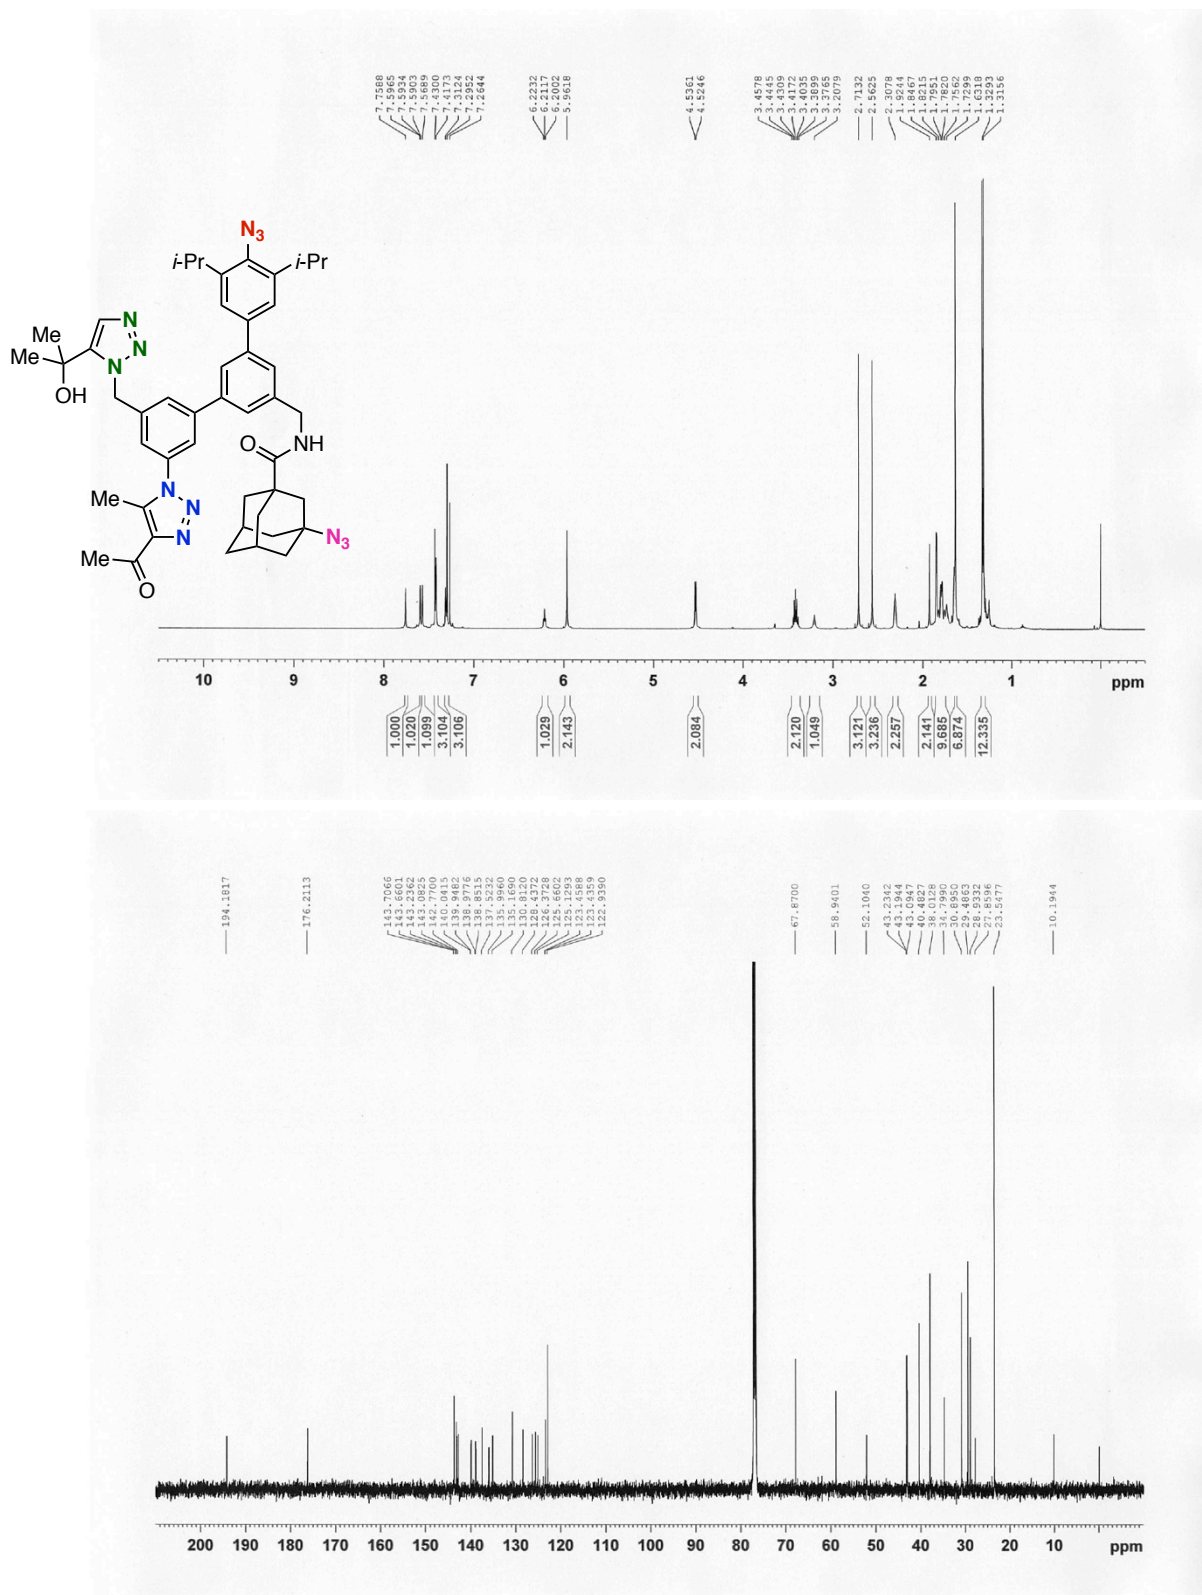



$^1\text{H}$  NMR (500 MHz) and  $^{13}\text{C}$  NMR (126 MHz) spectra of 3-azido-*N*-(3-(3-(4-acetyl-5-methyl-1*H*-1,2,3-triazol-1-yl)-5-((5-(2-hydroxypropan-2-yl)-1*H*-1,2,3-triazol-1-yl)methyl)phenyl)-5-(4-(8,9-dihydro-1-*H*-dibenzo[3,4:7,8]cycloocta[1,2-*d*][1,2,3]triazol-1-yl)-3,5-diisopropylphenyl)benzyl)adamantane-1-carboxamide (**S22**) ( $\text{CDCl}_3$ )

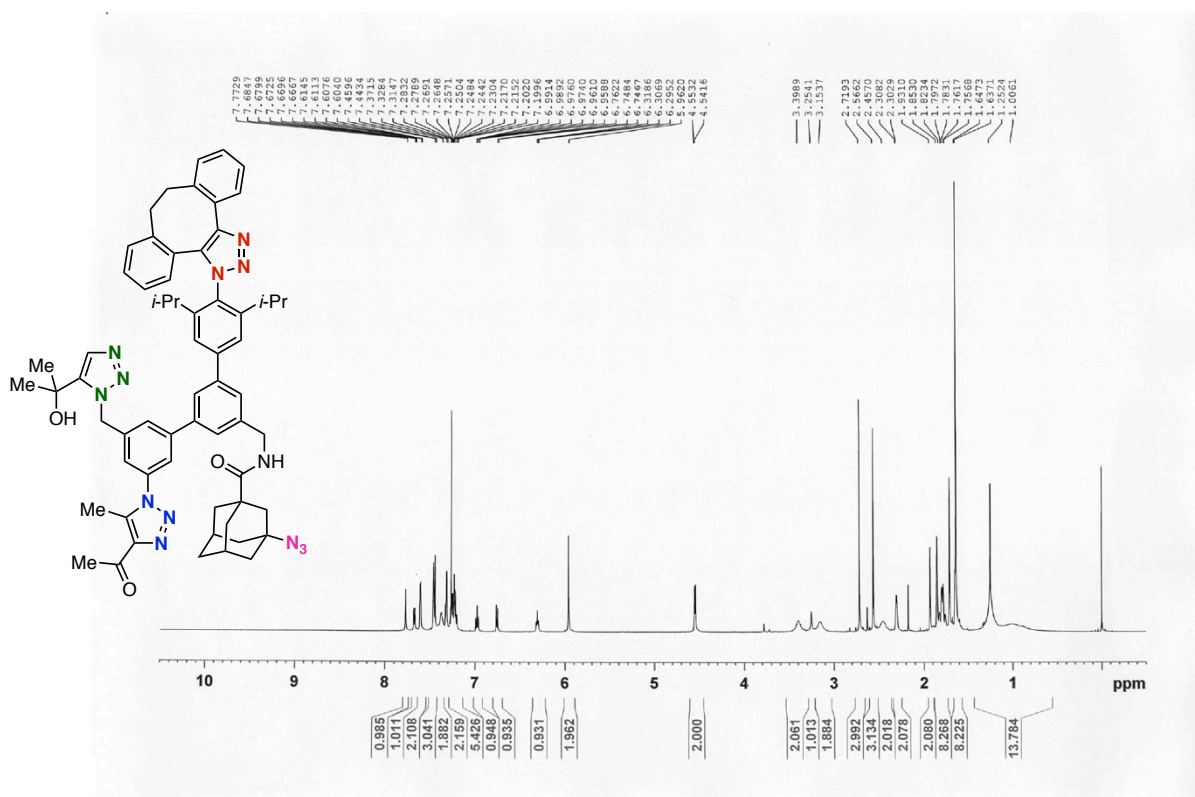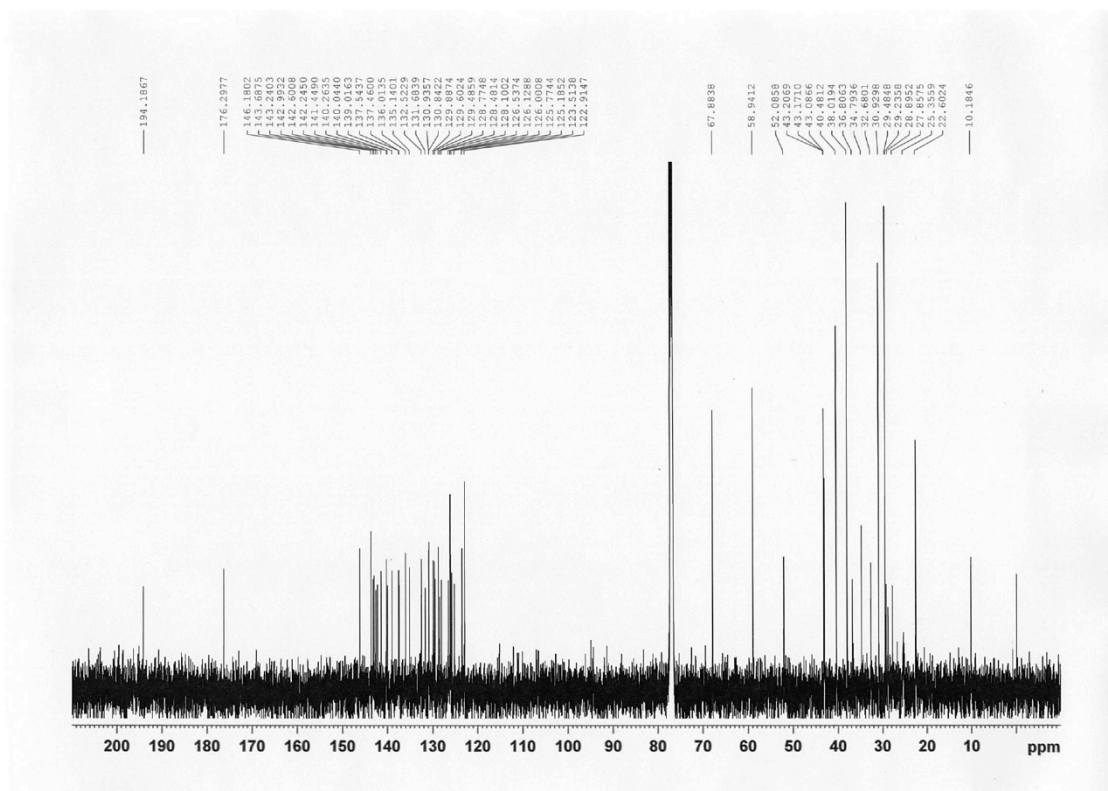

<sup>1</sup>H NMR (500 MHz) and <sup>13</sup>C NMR (126 MHz) spectra of 3-(4-(4-methylphenyl)-1*H*-1,2,3-triazol-1-yl)-*N*-(3-(3-(4-acetyl-5-methyl-1*H*-1,2,3-triazol-1-yl)-5-((5-(2-hydroxypropan-2-yl)-1*H*-1,2,3-triazol-1-yl)methyl)phenyl)-5-(4-(8,9-dihydro-1-*H*-dibenzo[3,4:7,8]cycloocta[1,2-*d*][1,2,3]triazol-1-yl)-3,5-diisopropylphenyl)benzyl)adamantane-1-carboxamide (**21**) (CDCl<sub>3</sub>)

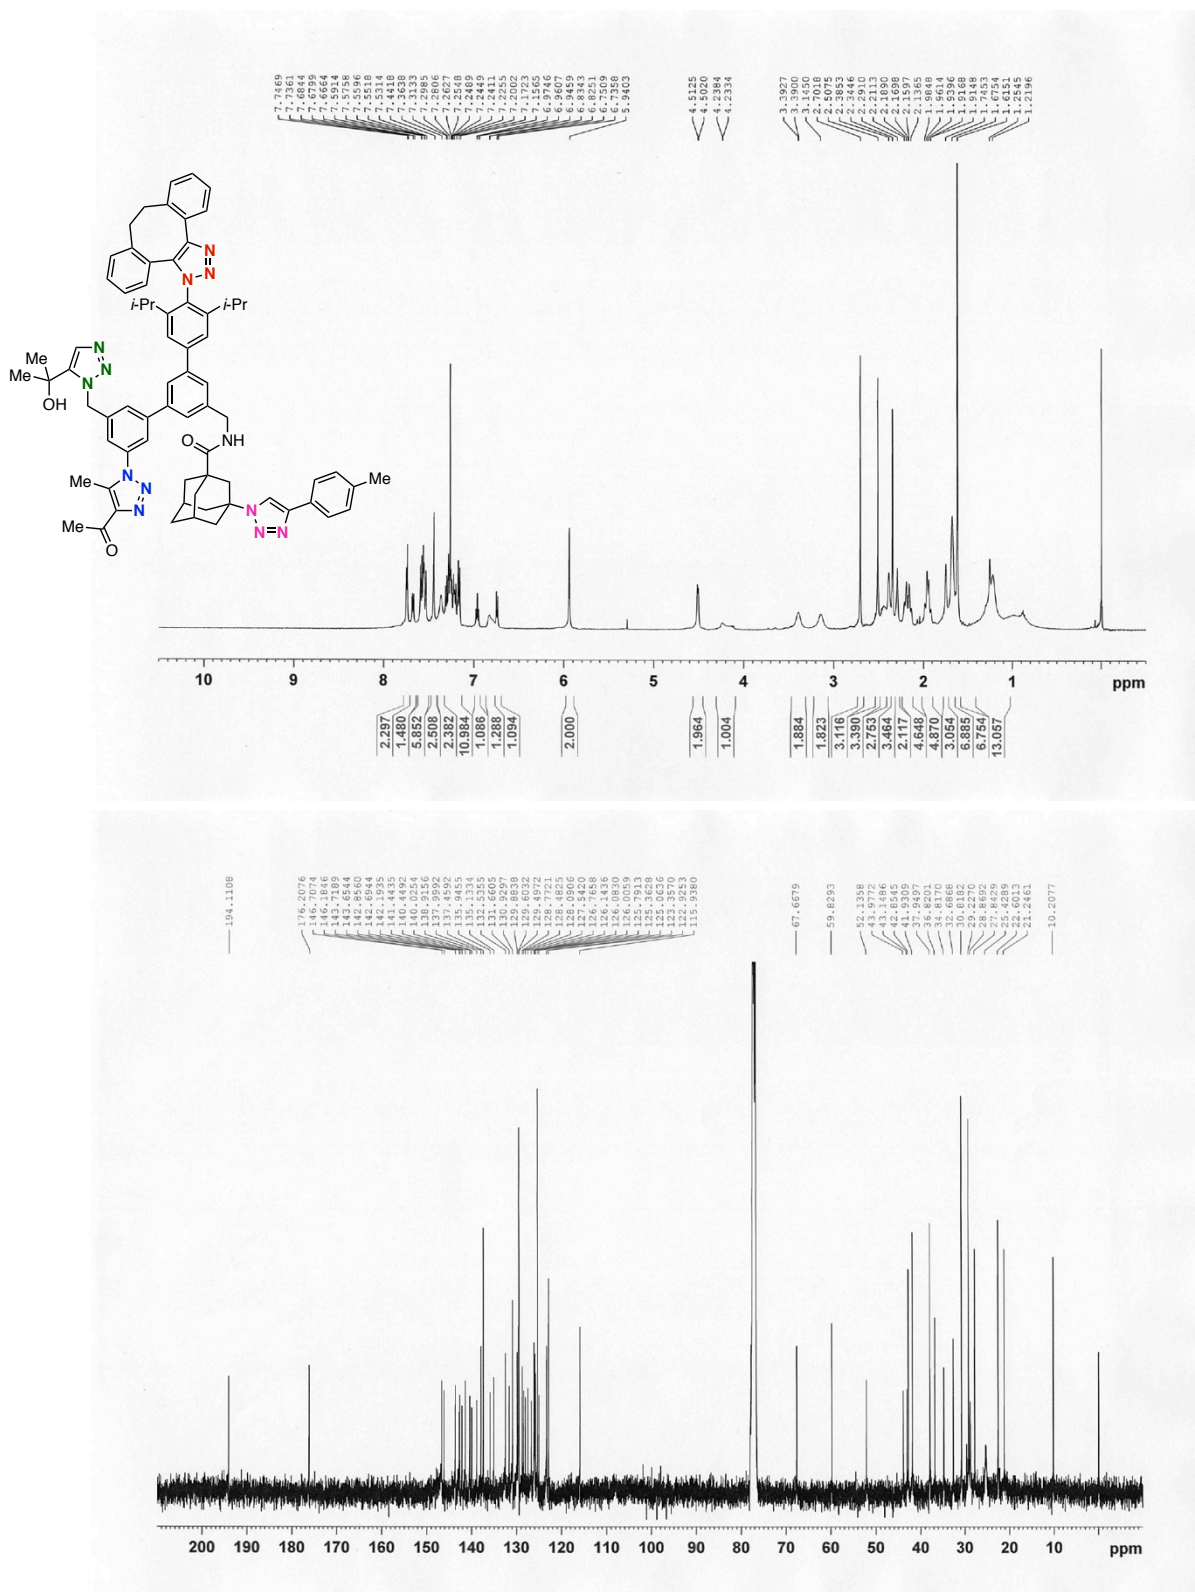



$^1\text{H}$  NMR (500 MHz) and  $^{13}\text{C}$  NMR (126 MHz) spectra of *N*-(5,11-bis(((1,3-dihydroxypropan-2-yl)oxy)methyl)-1,15-dihydroxy-2,14-bis(hydroxymethyl)-3,6,10,13-tetraoxapentadecan-8-yl)-4-ethynylbenzamide (**25**) ( $\text{CD}_3\text{OD}$ )

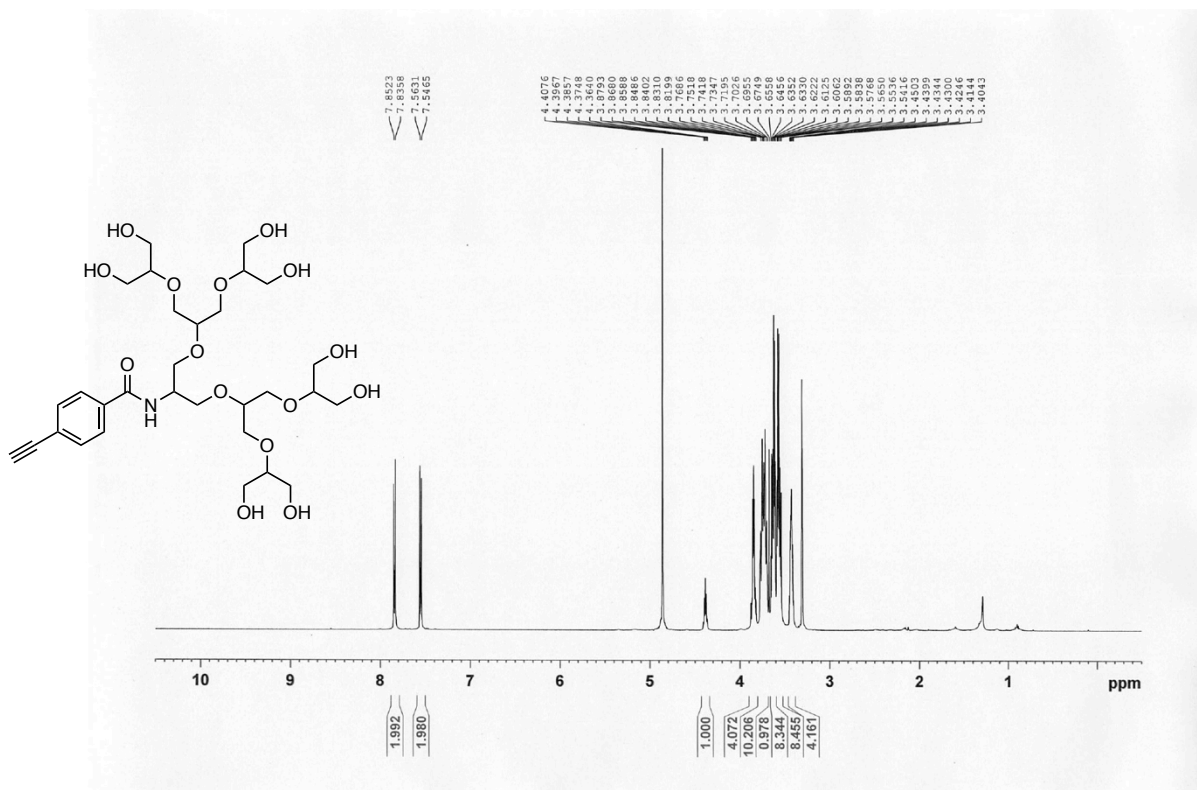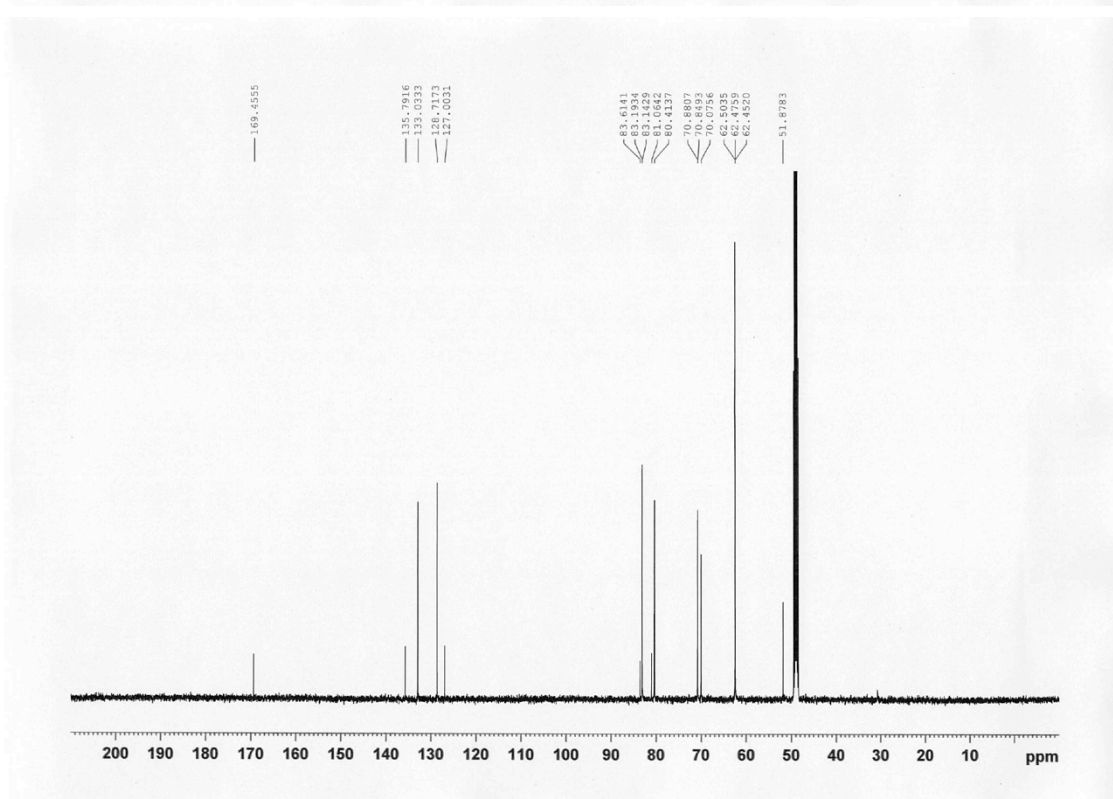

$^1\text{H}$  NMR (500 MHz) and  $^{13}\text{C}$  NMR (126 MHz) spectra of platform-HTL conjugate **S25** ( $\text{CDCl}_3$ )

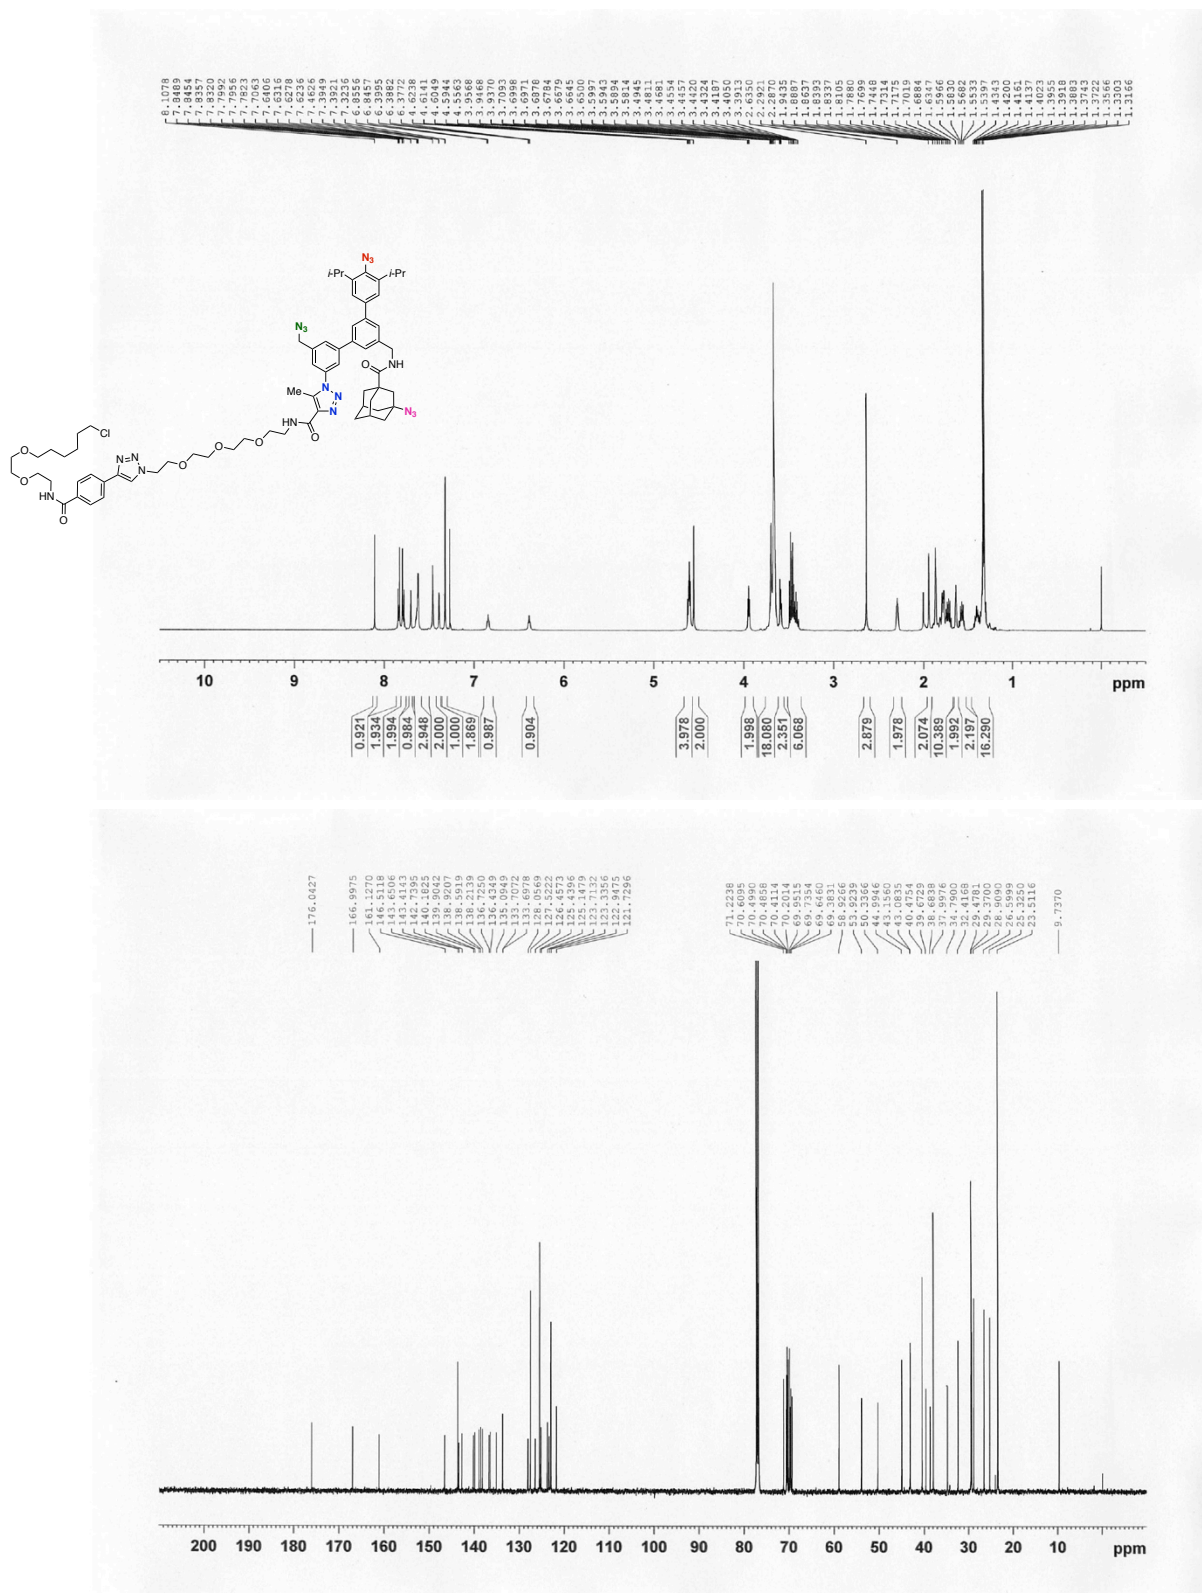

<sup>1</sup>H NMR (500 MHz) and <sup>13</sup>C NMR (126 MHz) spectra of platform-HTL-BODIPY conjugate **S26** (CDCl<sub>3</sub>)

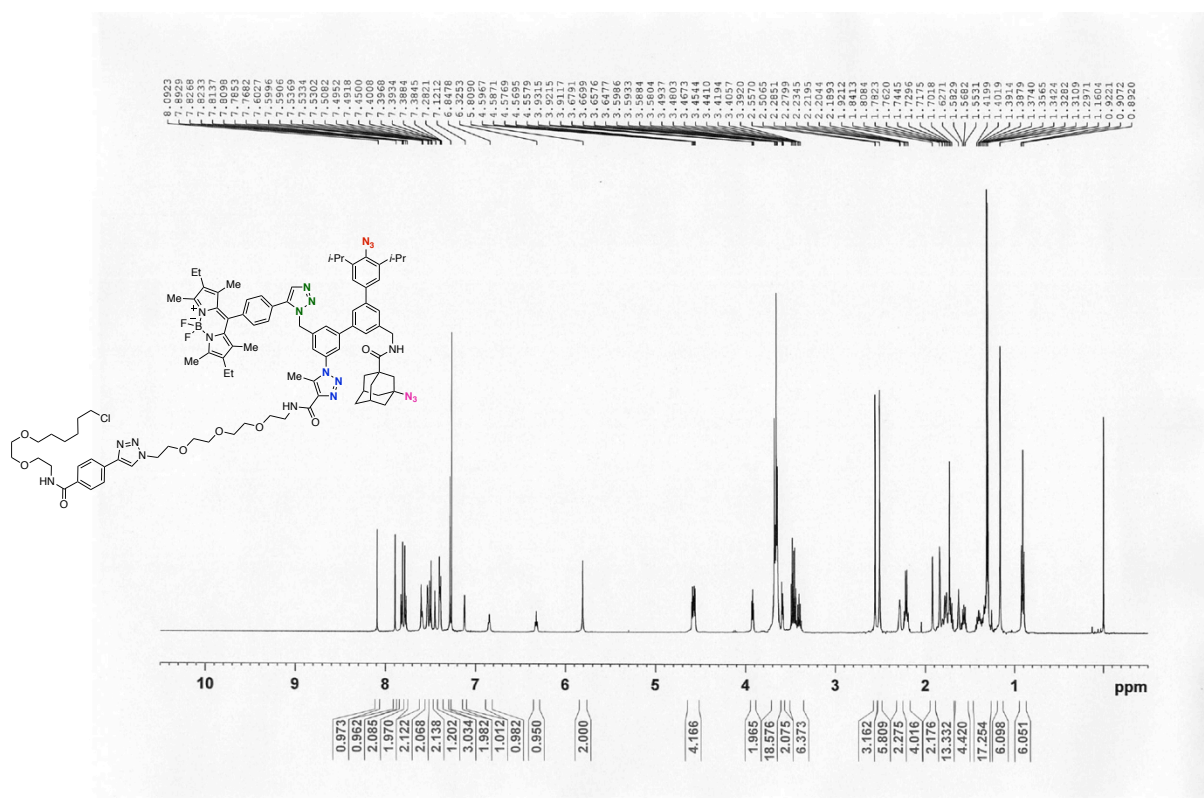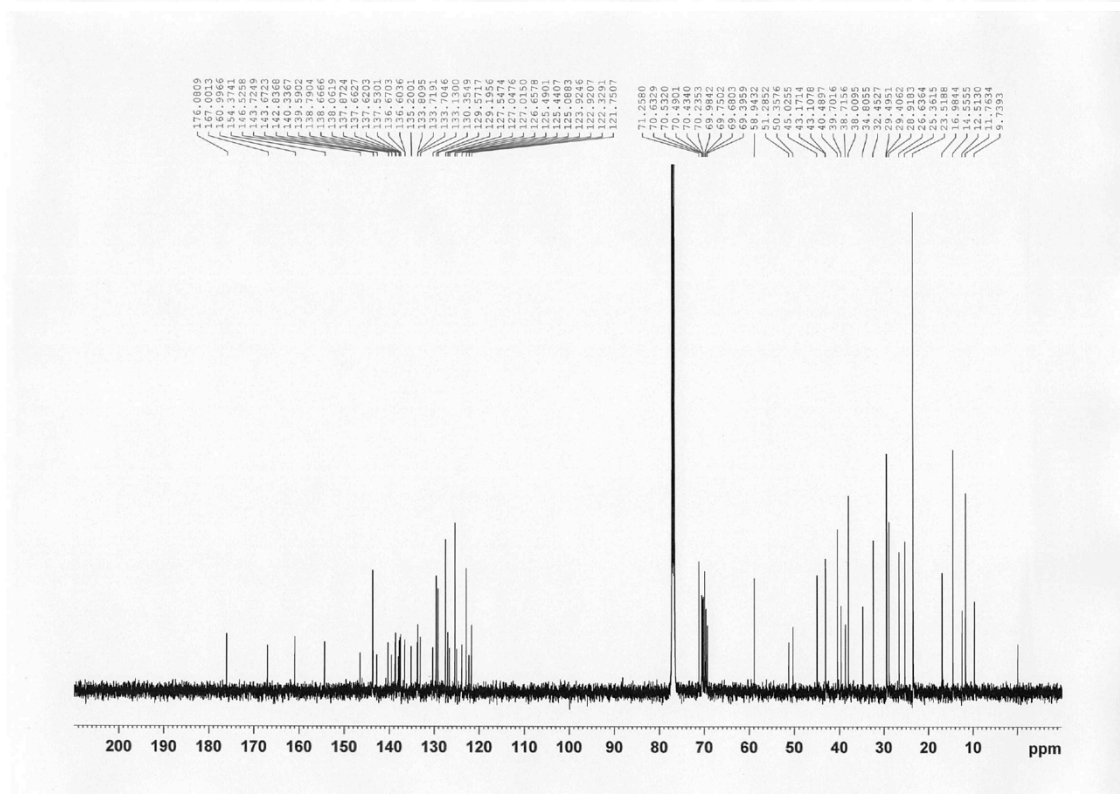

$^1\text{H}$  NMR (500 MHz) spectrum of platform-HTL-BODIPY-biotin conjugate **26** ( $\text{CDCl}_3$ )

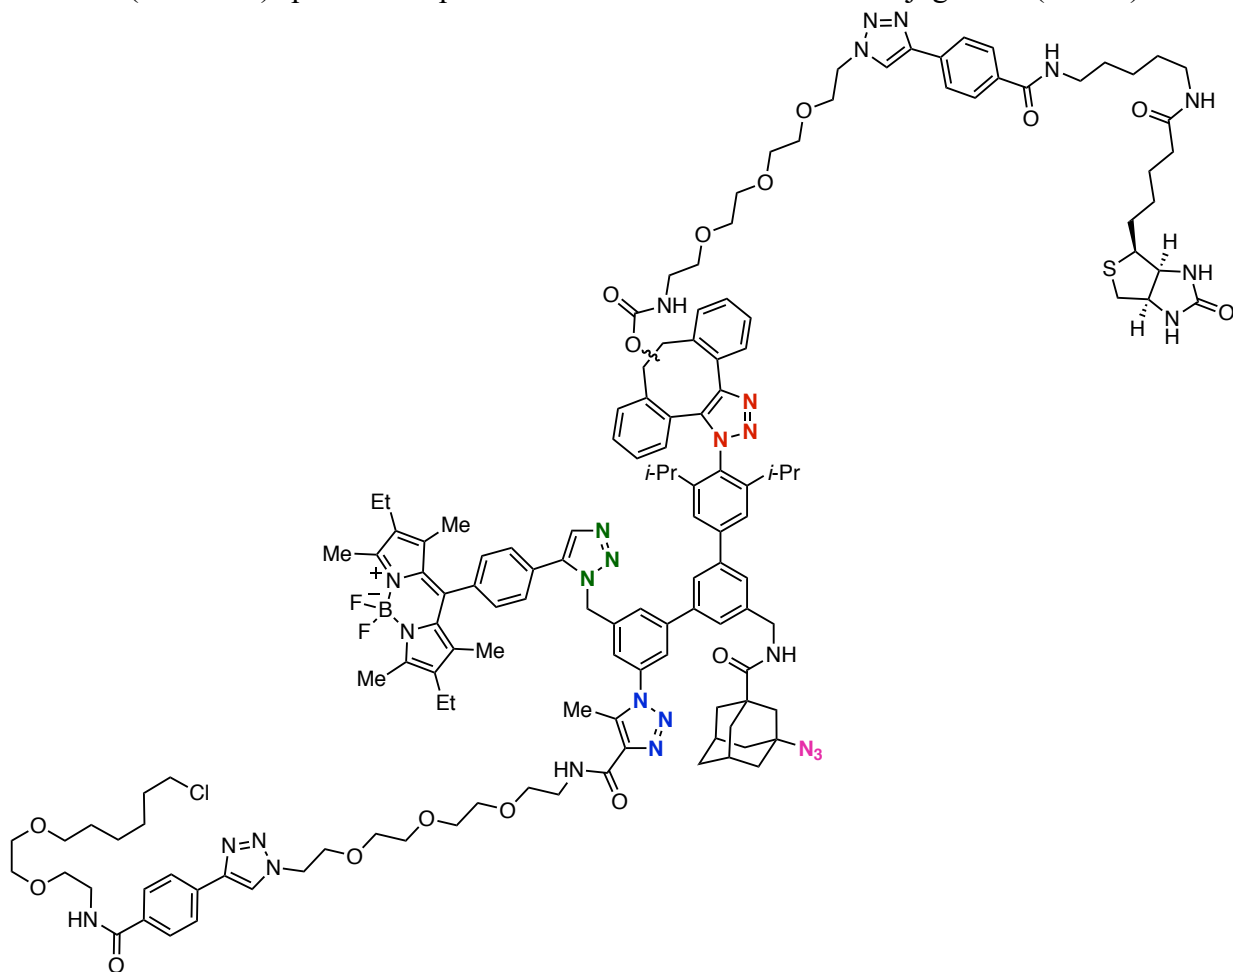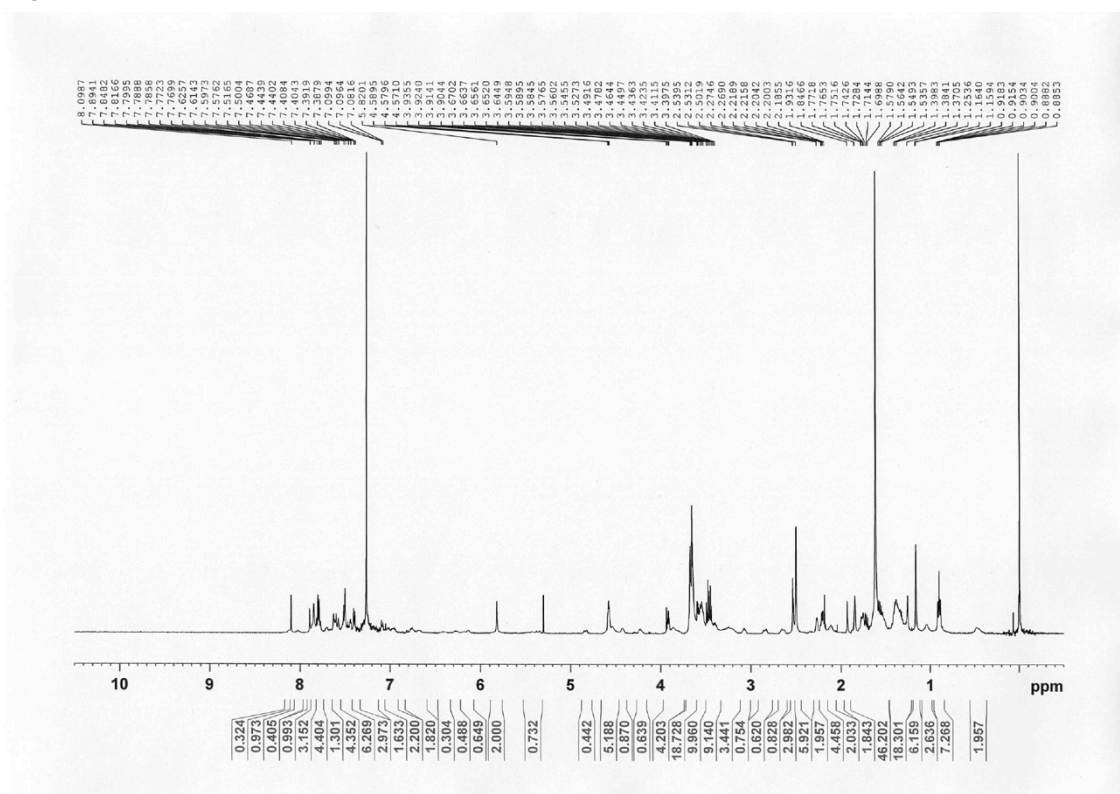



$^1\text{H}$  NMR (500 MHz) spectrum of platform-HTL-BODIPY-biotin-BGL conjugate **27** ( $\text{CDCl}_3$ )

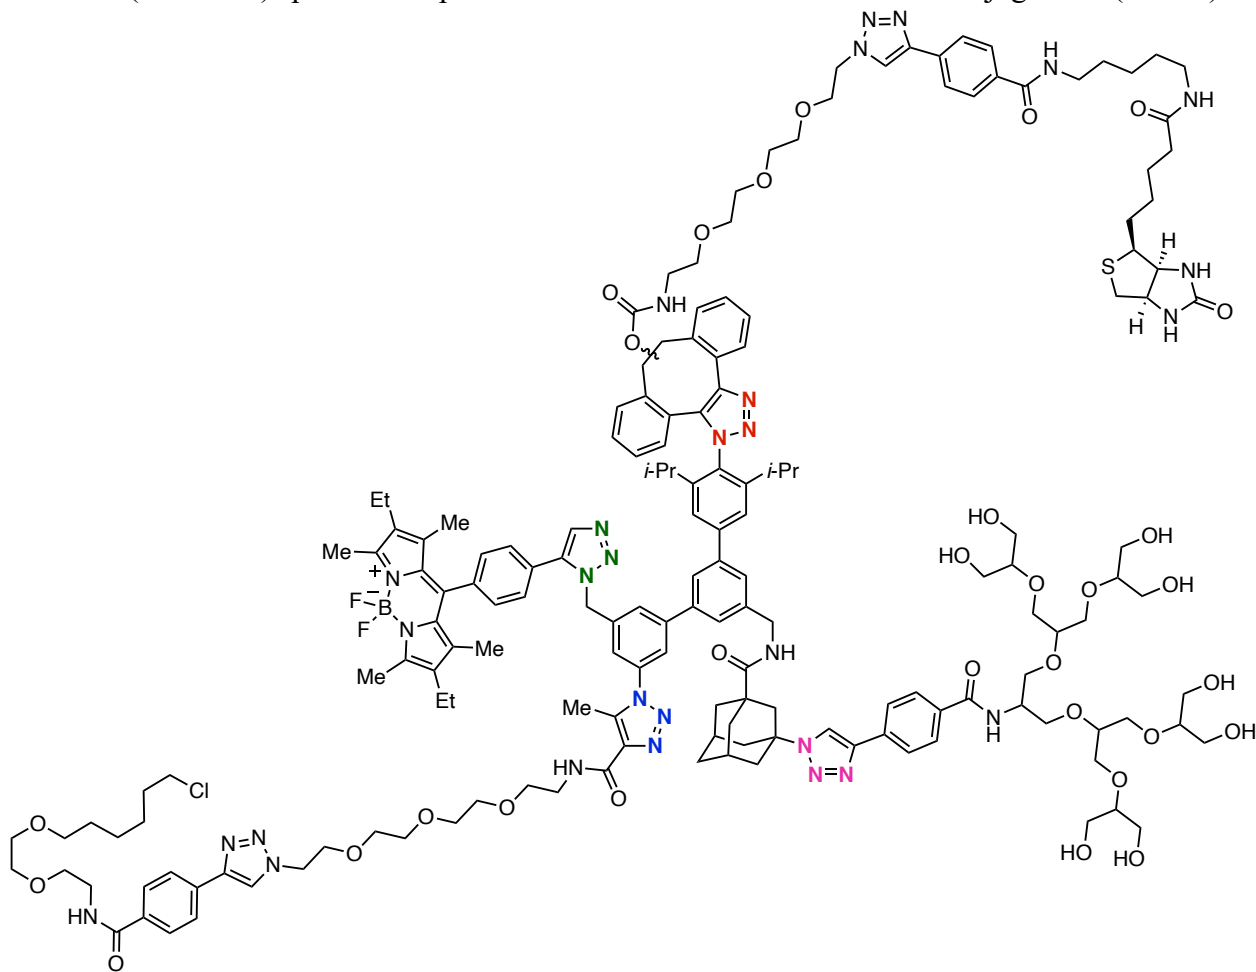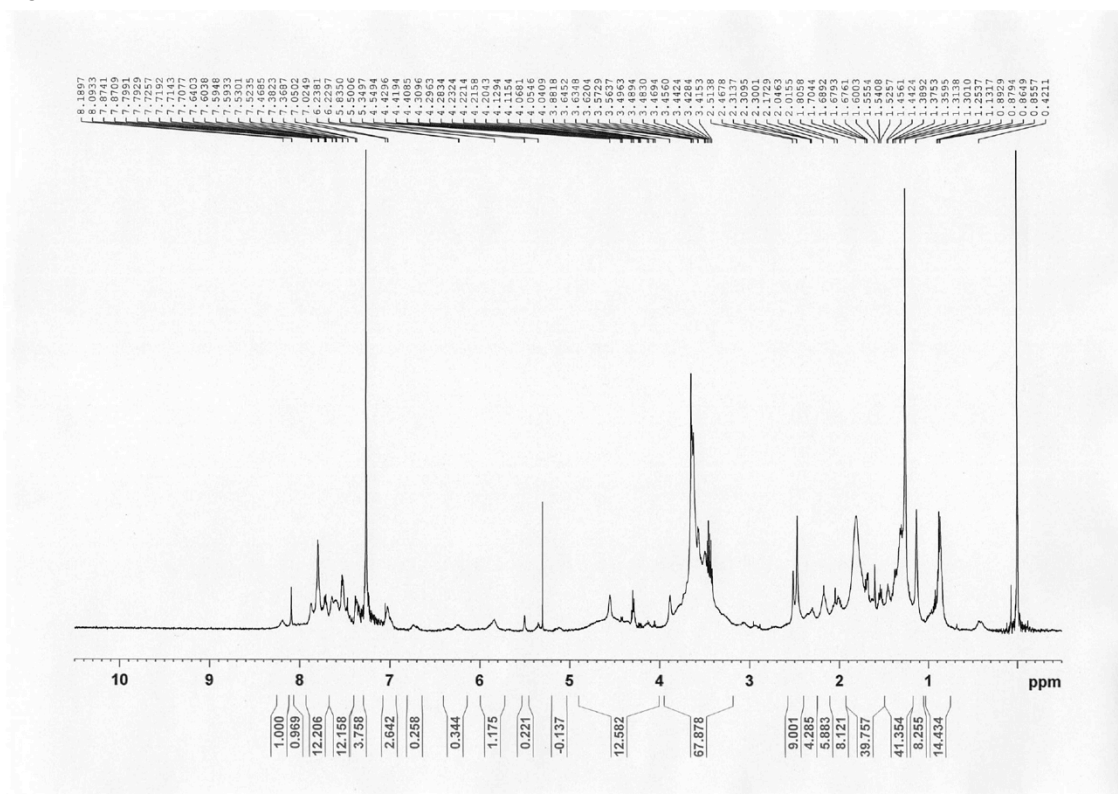

Supplement: d0cc07789e1.pdf [file d0cc07789e1.pdf]
